# Supplementary material for: Magnetic resorcinol-formaldehyde supported Schiff-base/Cu as a robust and recoverable nanocatalyst for the synthesis of tetrahydrobenzo[ b ]pyrans
Source: Royal Society of Chemistry journal article supplement (doi:10.1039/d5na00678c), 2026-01-01
Supplement: d5na00678c1.xlsx [file d5na00678c1.xlsx]

## Sheet: FT-IR spectra of Fe3O4 
4000	98.3367
3999	98.3345
3998	98.3325
3997	98.3306
3996	98.3289
3995	98.3272
3994	98.3257
3993	98.3243
3992	98.3229
3991	98.3216
3990	98.3204
3989	98.3196
3988	98.3192
3987	98.3194
3986	98.3201
3985	98.3212
3984	98.3227
3983	98.3245
3982	98.3264
3981	98.3279
3980	98.3289
3979	98.3292
3978	98.3287
3977	98.3272
3976	98.3248
3975	98.3216
3974	98.3178
3973	98.3138
3972	98.3098
3971	98.306
3970	98.3029
3969	98.3005
3968	98.2991
3967	98.2986
3966	98.2989
3965	98.2999
3964	98.3011
3963	98.3024
3962	98.3033
3961	98.3038
3960	98.3038
3959	98.3032
3958	98.3019
3957	98.3002
3956	98.2981
3955	98.2959
3954	98.2936
3953	98.2914
3952	98.2895
3951	98.288
3950	98.2871
3949	98.2867
3948	98.2869
3947	98.2875
3946	98.2886
3945	98.2899
3944	98.2913
3943	98.2926
3942	98.2938
3941	98.2948
3940	98.2957
3939	98.2963
3938	98.2967
3937	98.2969
3936	98.2968
3935	98.2964
3934	98.2957
3933	98.2948
3932	98.2937
3931	98.2925
3930	98.2911
3929	98.2897
3928	98.2882
3927	98.2869
3926	98.2856
3925	98.2843
3924	98.283
3923	98.2819
3922	98.281
3921	98.2803
3920	98.2798
3919	98.2796
3918	98.2796
3917	98.2797
3916	98.2799
3915	98.2801
3914	98.2801
3913	98.2799
3912	98.2794
3911	98.2786
3910	98.2776
3909	98.2766
3908	98.2755
3907	98.2745
3906	98.2734
3905	98.2724
3904	98.2715
3903	98.2707
3902	98.2702
3901	98.2698
3900	98.2695
3899	98.2695
3898	98.2695
3897	98.2696
3896	98.2697
3895	98.2699
3894	98.27
3893	98.2701
3892	98.27
3891	98.2699
3890	98.2697
3889	98.2695
3888	98.2694
3887	98.2695
3886	98.2698
3885	98.2701
3884	98.2706
3883	98.2711
3882	98.2717
3881	98.2723
3880	98.2729
3879	98.2734
3878	98.2738
3877	98.2742
3876	98.2747
3875	98.2752
3874	98.276
3873	98.2768
3872	98.2779
3871	98.2792
3870	98.2807
3869	98.2825
3868	98.2846
3867	98.2869
3866	98.2894
3865	98.2919
3864	98.2947
3863	98.2975
3862	98.3004
3861	98.3033
3860	98.3059
3859	98.3081
3858	98.3099
3857	98.3114
3856	98.3124
3855	98.313
3854	98.313
3853	98.3127
3852	98.3119
3851	98.311
3850	98.3099
3849	98.3087
3848	98.3077
3847	98.3069
3846	98.3063
3845	98.3061
3844	98.3062
3843	98.3067
3842	98.3073
3841	98.308
3840	98.3085
3839	98.3089
3838	98.309
3837	98.3089
3836	98.3083
3835	98.3073
3834	98.3061
3833	98.3046
3832	98.3031
3831	98.3016
3830	98.3004
3829	98.2995
3828	98.2991
3827	98.2992
3826	98.2999
3825	98.301
3824	98.3026
3823	98.3045
3822	98.3066
3821	98.3085
3820	98.3101
3819	98.3113
3818	98.312
3817	98.3121
3816	98.3116
3815	98.3106
3814	98.3092
3813	98.3076
3812	98.306
3811	98.3046
3810	98.3037
3809	98.3033
3808	98.3037
3807	98.3046
3806	98.306
3805	98.3078
3804	98.3097
3803	98.3114
3802	98.3126
3801	98.3131
3800	98.3129
3799	98.3119
3798	98.3102
3797	98.3078
3796	98.3049
3795	98.3019
3794	98.299
3793	98.2963
3792	98.2939
3791	98.292
3790	98.2907
3789	98.2901
3788	98.2902
3787	98.2909
3786	98.2921
3785	98.2936
3784	98.2952
3783	98.2968
3782	98.2983
3781	98.2999
3780	98.3012
3779	98.3024
3778	98.3034
3777	98.304
3776	98.3044
3775	98.3046
3774	98.3045
3773	98.3041
3772	98.3034
3771	98.3025
3770	98.3015
3769	98.3005
3768	98.2997
3767	98.2992
3766	98.299
3765	98.2993
3764	98.2999
3763	98.3011
3762	98.3028
3761	98.305
3760	98.3075
3759	98.3104
3758	98.3136
3757	98.3169
3756	98.3203
3755	98.3235
3754	98.3265
3753	98.329
3752	98.331
3751	98.3322
3750	98.3326
3749	98.3321
3748	98.3311
3747	98.3295
3746	98.3276
3745	98.3255
3744	98.3235
3743	98.3215
3742	98.3199
3741	98.3187
3740	98.318
3739	98.3179
3738	98.3182
3737	98.3188
3736	98.3196
3735	98.3205
3734	98.3214
3733	98.3221
3732	98.3227
3731	98.323
3730	98.323
3729	98.3228
3728	98.3226
3727	98.3225
3726	98.3226
3725	98.323
3724	98.3237
3723	98.3245
3722	98.3255
3721	98.3265
3720	98.3275
3719	98.3281
3718	98.3285
3717	98.3284
3716	98.328
3715	98.3274
3714	98.3267
3713	98.3258
3712	98.3248
3711	98.3237
3710	98.3225
3709	98.3212
3708	98.3196
3707	98.3179
3706	98.3159
3705	98.3138
3704	98.3117
3703	98.3097
3702	98.308
3701	98.3065
3700	98.3053
3699	98.3044
3698	98.304
3697	98.3042
3696	98.3048
3695	98.3059
3694	98.3071
3693	98.3086
3692	98.3101
3691	98.3117
3690	98.3131
3689	98.3144
3688	98.3153
3687	98.3161
3686	98.3168
3685	98.3177
3684	98.3188
3683	98.3201
3682	98.3215
3681	98.3229
3680	98.3242
3679	98.3253
3678	98.326
3677	98.3262
3676	98.326
3675	98.3253
3674	98.3242
3673	98.3229
3672	98.3215
3671	98.3201
3670	98.3187
3669	98.3173
3668	98.316
3667	98.3149
3666	98.314
3665	98.3133
3664	98.313
3663	98.3129
3662	98.3131
3661	98.3135
3660	98.3139
3659	98.3144
3658	98.3149
3657	98.3152
3656	98.3153
3655	98.3151
3654	98.3147
3653	98.3141
3652	98.3132
3651	98.3119
3650	98.3102
3649	98.3082
3648	98.3059
3647	98.3032
3646	98.3004
3645	98.2976
3644	98.2948
3643	98.2921
3642	98.2896
3641	98.2873
3640	98.2851
3639	98.283
3638	98.2807
3637	98.2783
3636	98.2756
3635	98.2729
3634	98.2701
3633	98.2673
3632	98.2645
3631	98.262
3630	98.2597
3629	98.2575
3628	98.2557
3627	98.2539
3626	98.2522
3625	98.2505
3624	98.2485
3623	98.2462
3622	98.2436
3621	98.2404
3620	98.2368
3619	98.2327
3618	98.2283
3617	98.2237
3616	98.219
3615	98.2145
3614	98.2101
3613	98.2061
3612	98.2025
3611	98.1991
3610	98.196
3609	98.1929
3608	98.1897
3607	98.1863
3606	98.1826
3605	98.1786
3604	98.1744
3603	98.17
3602	98.1654
3601	98.1608
3600	98.1562
3599	98.1518
3598	98.1476
3597	98.1437
3596	98.1401
3595	98.1368
3594	98.1338
3593	98.1309
3592	98.1281
3591	98.1252
3590	98.1222
3589	98.119
3588	98.1156
3587	98.1121
3586	98.1084
3585	98.1048
3584	98.1012
3583	98.0976
3582	98.094
3581	98.0903
3580	98.0865
3579	98.0824
3578	98.0781
3577	98.0734
3576	98.0686
3575	98.0636
3574	98.0583
3573	98.0529
3572	98.0474
3571	98.0419
3570	98.0364
3569	98.031
3568	98.0257
3567	98.0204
3566	98.0154
3565	98.0107
3564	98.0061
3563	98.0017
3562	97.9973
3561	97.9929
3560	97.9884
3559	97.9837
3558	97.9788
3557	97.9737
3556	97.9684
3555	97.963
3554	97.9576
3553	97.952
3552	97.9465
3551	97.9409
3550	97.9354
3549	97.93
3548	97.9246
3547	97.9192
3546	97.9138
3545	97.9085
3544	97.9032
3543	97.898
3542	97.8927
3541	97.8875
3540	97.8822
3539	97.8769
3538	97.8717
3537	97.8665
3536	97.8614
3535	97.8565
3534	97.8518
3533	97.8474
3532	97.8432
3531	97.8393
3530	97.8357
3529	97.8322
3528	97.8287
3527	97.8251
3526	97.8213
3525	97.8172
3524	97.8127
3523	97.8077
3522	97.8023
3521	97.7965
3520	97.7904
3519	97.784
3518	97.7777
3517	97.7715
3516	97.7655
3515	97.7597
3514	97.7543
3513	97.7492
3512	97.7444
3511	97.7399
3510	97.7357
3509	97.7316
3508	97.7275
3507	97.7234
3506	97.7192
3505	97.7148
3504	97.7102
3503	97.7053
3502	97.7003
3501	97.695
3500	97.6896
3499	97.6841
3498	97.6786
3497	97.673
3496	97.6674
3495	97.6618
3494	97.6562
3493	97.6505
3492	97.6449
3491	97.6393
3490	97.6337
3489	97.6282
3488	97.6227
3487	97.6174
3486	97.6122
3485	97.6071
3484	97.6021
3483	97.5972
3482	97.5923
3481	97.5873
3480	97.5823
3479	97.5773
3478	97.5722
3477	97.5673
3476	97.5623
3475	97.5575
3474	97.5527
3473	97.548
3472	97.5435
3471	97.539
3470	97.5345
3469	97.53
3468	97.5255
3467	97.5209
3466	97.5163
3465	97.5116
3464	97.5069
3463	97.5021
3462	97.4974
3461	97.4927
3460	97.488
3459	97.4835
3458	97.479
3457	97.4747
3456	97.4706
3455	97.4666
3454	97.4627
3453	97.4589
3452	97.4553
3451	97.4516
3450	97.4479
3449	97.4443
3448	97.4406
3447	97.4369
3446	97.4332
3445	97.4294
3444	97.4256
3443	97.4218
3442	97.4179
3441	97.414
3440	97.4102
3439	97.4065
3438	97.4028
3437	97.3992
3436	97.3957
3435	97.3924
3434	97.3893
3433	97.3863
3432	97.3833
3431	97.3804
3430	97.3773
3429	97.3743
3428	97.3713
3427	97.3683
3426	97.3654
3425	97.3625
3424	97.3598
3423	97.3572
3422	97.3547
3421	97.3524
3420	97.3503
3419	97.3481
3418	97.3461
3417	97.3441
3416	97.3423
3415	97.3407
3414	97.3393
3413	97.338
3412	97.3366
3411	97.3353
3410	97.3339
3409	97.3325
3408	97.3311
3407	97.3295
3406	97.3279
3405	97.3261
3404	97.3242
3403	97.3223
3402	97.3204
3401	97.3187
3400	97.3169
3399	97.3152
3398	97.3135
3397	97.3119
3396	97.3106
3395	97.3096
3394	97.3089
3393	97.3084
3392	97.308
3391	97.3078
3390	97.3078
3389	97.3079
3388	97.3082
3387	97.3084
3386	97.3085
3385	97.3084
3384	97.3082
3383	97.308
3382	97.3079
3381	97.3076
3380	97.3073
3379	97.307
3378	97.3067
3377	97.3066
3376	97.3066
3375	97.3068
3374	97.3071
3373	97.3075
3372	97.308
3371	97.3084
3370	97.3089
3369	97.3091
3368	97.3092
3367	97.3088
3366	97.3081
3365	97.3073
3364	97.3064
3363	97.3056
3362	97.305
3361	97.3046
3360	97.3046
3359	97.3051
3358	97.306
3357	97.3075
3356	97.3092
3355	97.3111
3354	97.3131
3353	97.3152
3352	97.3173
3351	97.3192
3350	97.3212
3349	97.323
3348	97.3247
3347	97.3262
3346	97.3274
3345	97.3285
3344	97.3295
3343	97.3304
3342	97.3309
3341	97.3312
3340	97.3312
3339	97.3309
3338	97.3305
3337	97.3299
3336	97.3295
3335	97.3291
3334	97.3289
3333	97.329
3332	97.3294
3331	97.3301
3330	97.3311
3329	97.3321
3328	97.3331
3327	97.3341
3326	97.335
3325	97.3358
3324	97.3366
3323	97.3373
3322	97.3379
3321	97.3385
3320	97.3391
3319	97.3398
3318	97.3406
3317	97.3416
3316	97.3429
3315	97.3443
3314	97.3457
3313	97.3473
3312	97.3488
3311	97.3503
3310	97.3517
3309	97.3529
3308	97.3539
3307	97.3547
3306	97.3552
3305	97.3556
3304	97.3559
3303	97.3561
3302	97.3564
3301	97.3567
3300	97.3571
3299	97.3577
3298	97.3586
3297	97.3598
3296	97.3614
3295	97.3632
3294	97.3651
3293	97.367
3292	97.3686
3291	97.3698
3290	97.3708
3289	97.3713
3288	97.3717
3287	97.3718
3286	97.3721
3285	97.3724
3284	97.373
3283	97.3741
3282	97.3757
3281	97.3778
3280	97.3802
3279	97.3829
3278	97.3857
3277	97.3883
3276	97.3906
3275	97.3924
3274	97.3933
3273	97.3934
3272	97.3925
3271	97.3908
3270	97.3884
3269	97.3858
3268	97.383
3267	97.3802
3266	97.3774
3265	97.3748
3264	97.3723
3263	97.3701
3262	97.3683
3261	97.3668
3260	97.3656
3259	97.3649
3258	97.3645
3257	97.3647
3256	97.3653
3255	97.3664
3254	97.3678
3253	97.3693
3252	97.3708
3251	97.3724
3250	97.374
3249	97.3756
3248	97.3773
3247	97.379
3246	97.3805
3245	97.3821
3244	97.3836
3243	97.3851
3242	97.3867
3241	97.3882
3240	97.3897
3239	97.3911
3238	97.3924
3237	97.3935
3236	97.3943
3235	97.3948
3234	97.3948
3233	97.3944
3232	97.3937
3231	97.3927
3230	97.3916
3229	97.3905
3228	97.3895
3227	97.3887
3226	97.3881
3225	97.3878
3224	97.3879
3223	97.3883
3222	97.389
3221	97.3898
3220	97.3907
3219	97.3917
3218	97.3927
3217	97.3937
3216	97.3945
3215	97.3954
3214	97.3961
3213	97.3967
3212	97.3972
3211	97.3976
3210	97.3979
3209	97.3981
3208	97.3983
3207	97.3984
3206	97.3986
3205	97.3988
3204	97.3991
3203	97.3994
3202	97.3996
3201	97.3997
3200	97.3996
3199	97.3993
3198	97.3988
3197	97.398
3196	97.3971
3195	97.3961
3194	97.3952
3193	97.3944
3192	97.3941
3191	97.3942
3190	97.3949
3189	97.3961
3188	97.3979
3187	97.4
3186	97.4026
3185	97.4053
3184	97.4081
3183	97.4109
3182	97.4136
3181	97.4159
3180	97.4179
3179	97.4196
3178	97.4209
3177	97.4218
3176	97.4223
3175	97.4225
3174	97.4225
3173	97.4223
3172	97.4219
3171	97.4216
3170	97.4216
3169	97.4218
3168	97.4223
3167	97.423
3166	97.4241
3165	97.4253
3164	97.4266
3163	97.428
3162	97.4293
3161	97.4306
3160	97.4319
3159	97.4332
3158	97.4345
3157	97.4359
3156	97.4375
3155	97.4391
3154	97.4409
3153	97.4427
3152	97.4447
3151	97.4469
3150	97.4491
3149	97.4514
3148	97.4537
3147	97.4559
3146	97.4578
3145	97.4592
3144	97.4603
3143	97.4608
3142	97.461
3141	97.4609
3140	97.4606
3139	97.4602
3138	97.4598
3137	97.4596
3136	97.4597
3135	97.46
3134	97.4606
3133	97.4615
3132	97.4627
3131	97.464
3130	97.4656
3129	97.4675
3128	97.4697
3127	97.4721
3126	97.4747
3125	97.4775
3124	97.4804
3123	97.4831
3122	97.4858
3121	97.4883
3120	97.4904
3119	97.4923
3118	97.4937
3117	97.4948
3116	97.4954
3115	97.4958
3114	97.4959
3113	97.4959
3112	97.4958
3111	97.4958
3110	97.4958
3109	97.496
3108	97.4966
3107	97.4973
3106	97.4984
3105	97.4996
3104	97.5009
3103	97.5021
3102	97.5032
3101	97.5044
3100	97.5055
3099	97.5067
3098	97.5081
3097	97.5097
3096	97.5116
3095	97.5138
3094	97.5164
3093	97.5193
3092	97.5224
3091	97.5254
3090	97.5282
3089	97.5307
3088	97.5328
3087	97.5343
3086	97.5353
3085	97.5357
3084	97.5356
3083	97.5351
3082	97.5344
3081	97.5335
3080	97.5327
3079	97.5322
3078	97.5321
3077	97.5323
3076	97.5329
3075	97.5336
3074	97.5346
3073	97.5357
3072	97.5368
3071	97.5378
3070	97.5388
3069	97.5397
3068	97.5405
3067	97.5413
3066	97.5421
3065	97.5429
3064	97.5436
3063	97.5442
3062	97.5448
3061	97.5453
3060	97.546
3059	97.5468
3058	97.548
3057	97.5495
3056	97.5514
3055	97.5537
3054	97.5565
3053	97.5596
3052	97.5629
3051	97.5664
3050	97.5697
3049	97.5729
3048	97.5758
3047	97.5782
3046	97.5803
3045	97.582
3044	97.5832
3043	97.5842
3042	97.585
3041	97.5857
3040	97.5864
3039	97.5874
3038	97.5885
3037	97.5898
3036	97.5913
3035	97.5931
3034	97.5948
3033	97.5966
3032	97.5983
3031	97.5999
3030	97.6012
3029	97.6023
3028	97.6032
3027	97.604
3026	97.6048
3025	97.6055
3024	97.6063
3023	97.6071
3022	97.6081
3021	97.609
3020	97.6099
3019	97.611
3018	97.6121
3017	97.6133
3016	97.6146
3015	97.6161
3014	97.6178
3013	97.6196
3012	97.6217
3011	97.6238
3010	97.6262
3009	97.6287
3008	97.6314
3007	97.634
3006	97.6365
3005	97.6389
3004	97.6411
3003	97.643
3002	97.6445
3001	97.6455
3000	97.646
2999	97.6462
2998	97.646
2997	97.6456
2996	97.645
2995	97.6446
2994	97.6443
2993	97.6442
2992	97.6444
2991	97.645
2990	97.646
2989	97.6473
2988	97.6488
2987	97.6505
2986	97.6523
2985	97.6543
2984	97.6563
2983	97.6585
2982	97.6609
2981	97.6634
2980	97.6662
2979	97.6691
2978	97.6725
2977	97.6762
2976	97.6803
2975	97.6846
2974	97.689
2973	97.6935
2972	97.6979
2971	97.702
2970	97.7058
2969	97.7093
2968	97.7125
2967	97.7155
2966	97.7184
2965	97.7215
2964	97.725
2963	97.729
2962	97.7336
2961	97.7387
2960	97.7442
2959	97.7498
2958	97.7551
2957	97.76
2956	97.7643
2955	97.7678
2954	97.7704
2953	97.772
2952	97.7727
2951	97.7726
2950	97.7719
2949	97.7709
2948	97.7699
2947	97.7692
2946	97.7689
2945	97.7691
2944	97.7702
2943	97.7721
2942	97.7748
2941	97.7782
2940	97.7823
2939	97.7867
2938	97.7914
2937	97.7962
2936	97.8012
2935	97.8063
2934	97.8114
2933	97.8164
2932	97.821
2931	97.8253
2930	97.8292
2929	97.8326
2928	97.8355
2927	97.8381
2926	97.8403
2925	97.8421
2924	97.8436
2923	97.8449
2922	97.846
2921	97.8468
2920	97.8473
2919	97.8473
2918	97.8467
2917	97.8455
2916	97.8436
2915	97.8409
2914	97.8375
2913	97.8333
2912	97.8285
2911	97.8232
2910	97.8177
2909	97.812
2908	97.8066
2907	97.8017
2906	97.7974
2905	97.7938
2904	97.791
2903	97.7889
2902	97.7875
2901	97.7866
2900	97.7861
2899	97.7857
2898	97.7856
2897	97.7855
2896	97.7857
2895	97.786
2894	97.7866
2893	97.7874
2892	97.7885
2891	97.7898
2890	97.7911
2889	97.7924
2888	97.7937
2887	97.7947
2886	97.7955
2885	97.7961
2884	97.7965
2883	97.7967
2882	97.7968
2881	97.7967
2880	97.7966
2879	97.7965
2878	97.7965
2877	97.7966
2876	97.7967
2875	97.797
2874	97.7975
2873	97.7981
2872	97.7989
2871	97.7999
2870	97.8012
2869	97.8027
2868	97.8044
2867	97.8063
2866	97.8086
2865	97.8112
2864	97.8143
2863	97.8176
2862	97.8212
2861	97.825
2860	97.8287
2859	97.8322
2858	97.8353
2857	97.8379
2856	97.8398
2855	97.8411
2854	97.8415
2853	97.8413
2852	97.8402
2851	97.8385
2850	97.836
2849	97.8327
2848	97.8288
2847	97.8245
2846	97.8198
2845	97.8149
2844	97.81
2843	97.8051
2842	97.8005
2841	97.7964
2840	97.7929
2839	97.79
2838	97.7878
2837	97.7863
2836	97.7855
2835	97.7854
2834	97.7859
2833	97.787
2832	97.7885
2831	97.7903
2830	97.7921
2829	97.7938
2828	97.7954
2827	97.7968
2826	97.798
2825	97.7989
2824	97.7995
2823	97.7999
2822	97.8003
2821	97.8006
2820	97.8009
2819	97.8013
2818	97.8016
2817	97.802
2816	97.8024
2815	97.8029
2814	97.8036
2813	97.8044
2812	97.8053
2811	97.8061
2810	97.8069
2809	97.8076
2808	97.8082
2807	97.8089
2806	97.8094
2805	97.8098
2804	97.81
2803	97.81
2802	97.81
2801	97.8099
2800	97.8098
2799	97.8097
2798	97.8097
2797	97.8098
2796	97.8101
2795	97.8106
2794	97.8114
2793	97.8124
2792	97.8134
2791	97.8145
2790	97.8155
2789	97.8166
2788	97.8176
2787	97.8186
2786	97.8194
2785	97.8199
2784	97.8202
2783	97.8203
2782	97.8203
2781	97.8201
2780	97.8199
2779	97.8197
2778	97.8197
2777	97.8198
2776	97.8201
2775	97.8207
2774	97.8214
2773	97.8224
2772	97.8234
2771	97.8245
2770	97.8255
2769	97.8266
2768	97.8276
2767	97.8285
2766	97.8293
2765	97.8298
2764	97.8303
2763	97.8305
2762	97.8306
2761	97.8306
2760	97.8304
2759	97.8301
2758	97.8299
2757	97.8296
2756	97.8295
2755	97.8294
2754	97.8295
2753	97.8296
2752	97.8299
2751	97.8303
2750	97.8309
2749	97.8319
2748	97.833
2747	97.8343
2746	97.8357
2745	97.8373
2744	97.8389
2743	97.8406
2742	97.8422
2741	97.8438
2740	97.8454
2739	97.8469
2738	97.8483
2737	97.8497
2736	97.851
2735	97.8521
2734	97.853
2733	97.8537
2732	97.8541
2731	97.8542
2730	97.8542
2729	97.854
2728	97.8537
2727	97.8533
2726	97.853
2725	97.8528
2724	97.8526
2723	97.8527
2722	97.8529
2721	97.8533
2720	97.8539
2719	97.8546
2718	97.8556
2717	97.8567
2716	97.8579
2715	97.8593
2714	97.8605
2713	97.8618
2712	97.8629
2711	97.864
2710	97.865
2709	97.866
2708	97.8669
2707	97.8677
2706	97.8684
2705	97.8689
2704	97.8694
2703	97.8697
2702	97.8699
2701	97.8701
2700	97.8703
2699	97.8706
2698	97.871
2697	97.8716
2696	97.8725
2695	97.8734
2694	97.8744
2693	97.8754
2692	97.8764
2691	97.8774
2690	97.8783
2689	97.8791
2688	97.8798
2687	97.8803
2686	97.8807
2685	97.881
2684	97.8812
2683	97.8813
2682	97.8814
2681	97.8815
2680	97.8816
2679	97.8819
2678	97.8823
2677	97.8829
2676	97.8834
2675	97.8839
2674	97.8843
2673	97.8846
2672	97.885
2671	97.8856
2670	97.8864
2669	97.8875
2668	97.8889
2667	97.8905
2666	97.8925
2665	97.8948
2664	97.8973
2663	97.8997
2662	97.9019
2661	97.9039
2660	97.9056
2659	97.907
2658	97.9083
2657	97.9094
2656	97.9104
2655	97.9115
2654	97.9128
2653	97.9143
2652	97.9163
2651	97.9189
2650	97.9219
2649	97.9254
2648	97.9296
2647	97.9343
2646	97.9394
2645	97.9447
2644	97.9501
2643	97.9554
2642	97.9606
2641	97.9657
2640	97.9706
2639	97.9753
2638	97.9798
2637	97.9844
2636	97.9889
2635	97.9934
2634	97.9978
2633	98.002
2632	98.0059
2631	98.0094
2630	98.0125
2629	98.0152
2628	98.0177
2627	98.0199
2626	98.0217
2625	98.0234
2624	98.0251
2623	98.0268
2622	98.0284
2621	98.0299
2620	98.0314
2619	98.0328
2618	98.0343
2617	98.036
2616	98.0377
2615	98.0396
2614	98.0416
2613	98.0435
2612	98.0454
2611	98.0473
2610	98.0491
2609	98.0509
2608	98.0526
2607	98.0544
2606	98.0562
2605	98.0582
2604	98.0602
2603	98.0623
2602	98.0644
2601	98.0664
2600	98.0683
2599	98.0701
2598	98.0719
2597	98.0737
2596	98.0754
2595	98.0772
2594	98.079
2593	98.0807
2592	98.0825
2591	98.0843
2590	98.0861
2589	98.0879
2588	98.0896
2587	98.0913
2586	98.093
2585	98.0945
2584	98.096
2583	98.0973
2582	98.0984
2581	98.0994
2580	98.1002
2579	98.101
2578	98.1018
2577	98.1026
2576	98.1035
2575	98.1045
2574	98.1056
2573	98.107
2572	98.1086
2571	98.1103
2570	98.1122
2569	98.1141
2568	98.116
2567	98.1178
2566	98.1195
2565	98.1212
2564	98.1227
2563	98.1241
2562	98.1254
2561	98.1266
2560	98.1279
2559	98.1291
2558	98.1304
2557	98.1316
2556	98.1328
2555	98.1339
2554	98.1349
2553	98.1359
2552	98.1367
2551	98.1375
2550	98.1382
2549	98.1388
2548	98.1393
2547	98.1399
2546	98.1406
2545	98.1413
2544	98.142
2543	98.1428
2542	98.1437
2541	98.1446
2540	98.1456
2539	98.1466
2538	98.1476
2537	98.1485
2536	98.1492
2535	98.1497
2534	98.15
2533	98.15
2532	98.15
2531	98.15
2530	98.15
2529	98.15
2528	98.1503
2527	98.1508
2526	98.1514
2525	98.1523
2524	98.1534
2523	98.1544
2522	98.1555
2521	98.1566
2520	98.1576
2519	98.1585
2518	98.1593
2517	98.1599
2516	98.1603
2515	98.1604
2514	98.1604
2513	98.1602
2512	98.16
2511	98.1598
2510	98.1598
2509	98.1599
2508	98.1602
2507	98.1607
2506	98.1613
2505	98.1619
2504	98.1625
2503	98.163
2502	98.1633
2501	98.1636
2500	98.1637
2499	98.1638
2498	98.1639
2497	98.1638
2496	98.1638
2495	98.1638
2494	98.1639
2493	98.1643
2492	98.1649
2491	98.1657
2490	98.1667
2489	98.1679
2488	98.1692
2487	98.1705
2486	98.1717
2485	98.1727
2484	98.1734
2483	98.1737
2482	98.1738
2481	98.1736
2480	98.1733
2479	98.1728
2478	98.1722
2477	98.1716
2476	98.1711
2475	98.1708
2474	98.1706
2473	98.1704
2472	98.1703
2471	98.1702
2470	98.1701
2469	98.1698
2468	98.1694
2467	98.1688
2466	98.1679
2465	98.1668
2464	98.1657
2463	98.1647
2462	98.1641
2461	98.1638
2460	98.1639
2459	98.1644
2458	98.1654
2457	98.1666
2456	98.1681
2455	98.1698
2454	98.1714
2453	98.1729
2452	98.174
2451	98.1748
2450	98.1751
2449	98.1749
2448	98.1744
2447	98.1737
2446	98.1728
2445	98.1721
2444	98.1715
2443	98.1712
2442	98.1711
2441	98.1713
2440	98.1717
2439	98.1723
2438	98.1728
2437	98.1735
2436	98.1742
2435	98.1749
2434	98.1756
2433	98.1765
2432	98.1774
2431	98.1785
2430	98.1797
2429	98.181
2428	98.1823
2427	98.1837
2426	98.1852
2425	98.1866
2424	98.1879
2423	98.189
2422	98.1898
2421	98.1905
2420	98.1908
2419	98.191
2418	98.1909
2417	98.1906
2416	98.1903
2415	98.19
2414	98.1898
2413	98.1898
2412	98.1899
2411	98.19
2410	98.1901
2409	98.1901
2408	98.1902
2407	98.1903
2406	98.1905
2405	98.1907
2404	98.1909
2403	98.1911
2402	98.1914
2401	98.1917
2400	98.192
2399	98.1922
2398	98.1924
2397	98.1925
2396	98.1924
2395	98.1923
2394	98.1923
2393	98.1922
2392	98.1921
2391	98.192
2390	98.1917
2389	98.1914
2388	98.191
2387	98.1905
2386	98.1899
2385	98.1892
2384	98.1883
2383	98.1873
2382	98.1863
2381	98.1853
2380	98.1844
2379	98.1836
2378	98.1827
2377	98.1819
2376	98.1813
2375	98.1807
2374	98.1802
2373	98.1797
2372	98.1792
2371	98.1787
2370	98.1781
2369	98.1775
2368	98.1767
2367	98.1759
2366	98.175
2365	98.174
2364	98.1729
2363	98.1717
2362	98.1706
2361	98.1694
2360	98.1683
2359	98.1672
2358	98.166
2357	98.165
2356	98.164
2355	98.1631
2354	98.1622
2353	98.1614
2352	98.1607
2351	98.1602
2350	98.1598
2349	98.1597
2348	98.1597
2347	98.1599
2346	98.1601
2345	98.1603
2344	98.1603
2343	98.1602
2342	98.1599
2341	98.1594
2340	98.1586
2339	98.1576
2338	98.1566
2337	98.1555
2336	98.1545
2335	98.1534
2334	98.1524
2333	98.1515
2332	98.1507
2331	98.1501
2330	98.1498
2329	98.1495
2328	98.1495
2327	98.1495
2326	98.1496
2325	98.1497
2324	98.1499
2323	98.15
2322	98.15
2321	98.1501
2320	98.15
2319	98.15
2318	98.15
2317	98.15
2316	98.15
2315	98.15
2314	98.1501
2313	98.15
2312	98.15
2311	98.1499
2310	98.1497
2309	98.1496
2308	98.1495
2307	98.1495
2306	98.1495
2305	98.1498
2304	98.1502
2303	98.1508
2302	98.1515
2301	98.1524
2300	98.1534
2299	98.1543
2298	98.1552
2297	98.1562
2296	98.1571
2295	98.158
2294	98.1589
2293	98.1596
2292	98.1602
2291	98.1609
2290	98.1616
2289	98.1624
2288	98.1633
2287	98.1643
2286	98.1655
2285	98.1668
2284	98.1684
2283	98.17
2282	98.1717
2281	98.1731
2280	98.1744
2279	98.1754
2278	98.1763
2277	98.1772
2276	98.178
2275	98.1788
2274	98.1797
2273	98.1808
2272	98.1821
2271	98.1837
2270	98.1854
2269	98.1872
2268	98.1889
2267	98.1906
2266	98.1924
2265	98.1941
2264	98.1958
2263	98.1976
2262	98.1992
2261	98.2008
2260	98.2024
2259	98.2041
2258	98.2058
2257	98.2076
2256	98.2094
2255	98.2113
2254	98.2133
2253	98.2154
2252	98.2173
2251	98.2191
2250	98.2206
2249	98.2217
2248	98.2224
2247	98.2224
2246	98.2216
2245	98.2199
2244	98.2174
2243	98.2141
2242	98.2104
2241	98.2064
2240	98.2027
2239	98.1993
2238	98.1969
2237	98.1956
2236	98.1956
2235	98.1971
2234	98.1999
2233	98.2038
2232	98.2085
2231	98.2134
2230	98.218
2229	98.2218
2228	98.2243
2227	98.225
2226	98.2242
2225	98.2218
2224	98.2185
2223	98.2146
2222	98.2108
2221	98.2077
2220	98.206
2219	98.206
2218	98.2078
2217	98.2109
2216	98.2151
2215	98.2197
2214	98.2242
2213	98.2284
2212	98.232
2211	98.2348
2210	98.2367
2209	98.2374
2208	98.237
2207	98.2354
2206	98.2325
2205	98.2281
2204	98.2225
2203	98.2158
2202	98.2088
2201	98.202
2200	98.1962
2199	98.1918
2198	98.1887
2197	98.1871
2196	98.1868
2195	98.1875
2194	98.1889
2193	98.1905
2192	98.1921
2191	98.1933
2190	98.1936
2189	98.1928
2188	98.1909
2187	98.1879
2186	98.1841
2185	98.1798
2184	98.1754
2183	98.1711
2182	98.167
2181	98.163
2180	98.1591
2179	98.1552
2178	98.1513
2177	98.1472
2176	98.1423
2175	98.1361
2174	98.1287
2173	98.1203
2172	98.1116
2171	98.1035
2170	98.0968
2169	98.0921
2168	98.0901
2167	98.0914
2166	98.0962
2165	98.1045
2164	98.1156
2163	98.1287
2162	98.1428
2161	98.1573
2160	98.1718
2159	98.1863
2158	98.2005
2157	98.2142
2156	98.227
2155	98.2388
2154	98.2498
2153	98.2602
2152	98.2698
2151	98.2783
2150	98.2855
2149	98.2911
2148	98.2953
2147	98.2985
2146	98.3011
2145	98.3034
2144	98.3052
2143	98.3065
2142	98.3072
2141	98.3075
2140	98.3076
2139	98.3078
2138	98.3079
2137	98.3079
2136	98.3077
2135	98.3071
2134	98.3059
2133	98.304
2132	98.3013
2131	98.2981
2130	98.2944
2129	98.2906
2128	98.287
2127	98.2836
2126	98.2806
2125	98.2779
2124	98.2753
2123	98.2729
2122	98.2707
2121	98.2685
2120	98.2665
2119	98.2643
2118	98.2618
2117	98.2587
2116	98.2547
2115	98.2496
2114	98.2435
2113	98.2364
2112	98.2288
2111	98.2207
2110	98.2125
2109	98.2043
2108	98.1963
2107	98.1888
2106	98.1822
2105	98.1766
2104	98.1724
2103	98.1695
2102	98.1678
2101	98.1674
2100	98.1684
2099	98.171
2098	98.175
2097	98.1803
2096	98.1864
2095	98.1929
2094	98.1995
2093	98.206
2092	98.2121
2091	98.2176
2090	98.2222
2089	98.2256
2088	98.2275
2087	98.228
2086	98.2271
2085	98.2251
2084	98.2223
2083	98.2189
2082	98.2154
2081	98.2122
2080	98.2097
2079	98.2083
2078	98.2082
2077	98.2091
2076	98.2106
2075	98.2122
2074	98.2137
2073	98.2146
2072	98.2148
2071	98.214
2070	98.212
2069	98.2088
2068	98.2044
2067	98.1993
2066	98.1939
2065	98.1886
2064	98.1836
2063	98.1791
2062	98.1752
2061	98.1719
2060	98.1697
2059	98.1687
2058	98.169
2057	98.1704
2056	98.1725
2055	98.1752
2054	98.1781
2053	98.181
2052	98.1839
2051	98.1865
2050	98.1889
2049	98.1908
2048	98.1924
2047	98.1938
2046	98.1955
2045	98.1973
2044	98.1994
2043	98.2018
2042	98.2045
2041	98.2076
2040	98.2111
2039	98.215
2038	98.2192
2037	98.2236
2036	98.228
2035	98.2324
2034	98.2367
2033	98.2411
2032	98.2456
2031	98.2501
2030	98.2546
2029	98.2592
2028	98.2639
2027	98.2689
2026	98.2741
2025	98.2795
2024	98.2849
2023	98.2901
2022	98.295
2021	98.2995
2020	98.3036
2019	98.3072
2018	98.3102
2017	98.3127
2016	98.3147
2015	98.3166
2014	98.3185
2013	98.3205
2012	98.3224
2011	98.3243
2010	98.3258
2009	98.3269
2008	98.3276
2007	98.3277
2006	98.3273
2005	98.3264
2004	98.3252
2003	98.3238
2002	98.3224
2001	98.3212
[truncated: 1,601 more rows]

## Sheet: FT-IR spectra of Mag@RF
4000	99.46
3999	99.47
3998	99.48
3997	99.49
3996	99.49
3995	99.5
3994	99.5
3993	99.51
3992	99.51
3991	99.52
3990	99.52
3989	99.53
3988	99.53
3987	99.53
3986	99.53
3985	99.52
3984	99.52
3983	99.52
3982	99.51
3981	99.51
3980	99.51
3979	99.51
3978	99.51
3977	99.51
3976	99.51
3975	99.52
3974	99.52
3973	99.53
3972	99.53
3971	99.54
3970	99.55
3969	99.56
3968	99.57
3967	99.57
3966	99.58
3965	99.58
3964	99.59
3963	99.59
3962	99.59
3961	99.59
3960	99.59
3959	99.59
3958	99.58
3957	99.58
3956	99.57
3955	99.56
3954	99.56
3953	99.55
3952	99.55
3951	99.55
3950	99.54
3949	99.54
3948	99.54
3947	99.54
3946	99.54
3945	99.54
3944	99.54
3943	99.54
3942	99.54
3941	99.53
3940	99.53
3939	99.52
3938	99.51
3937	99.5
3936	99.49
3935	99.48
3934	99.48
3933	99.47
3932	99.46
3931	99.45
3930	99.44
3929	99.43
3928	99.42
3927	99.42
3926	99.42
3925	99.42
3924	99.42
3923	99.43
3922	99.44
3921	99.45
3920	99.47
3919	99.48
3918	99.49
3917	99.5
3916	99.51
3915	99.51
3914	99.5
3913	99.49
3912	99.48
3911	99.46
3910	99.45
3909	99.44
3908	99.44
3907	99.43
3906	99.43
3905	99.43
3904	99.44
3903	99.45
3902	99.46
3901	99.48
3900	99.49
3899	99.5
3898	99.51
3897	99.52
3896	99.52
3895	99.52
3894	99.52
3893	99.51
3892	99.51
3891	99.5
3890	99.49
3889	99.48
3888	99.47
3887	99.47
3886	99.48
3885	99.49
3884	99.49
3883	99.49
3882	99.49
3881	99.5
3880	99.5
3879	99.49
3878	99.48
3877	99.46
3876	99.45
3875	99.45
3874	99.43
3873	99.42
3872	99.42
3871	99.43
3870	99.44
3869	99.45
3868	99.47
3867	99.47
3866	99.49
3865	99.52
3864	99.55
3863	99.56
3862	99.57
3861	99.57
3860	99.57
3859	99.55
3858	99.51
3857	99.46
3856	99.41
3855	99.38
3854	99.37
3853	99.38
3852	99.39
3851	99.42
3850	99.45
3849	99.5
3848	99.54
3847	99.56
3846	99.57
3845	99.57
3844	99.57
3843	99.55
3842	99.52
3841	99.49
3840	99.46
3839	99.44
3838	99.44
3837	99.44
3836	99.45
3835	99.47
3834	99.5
3833	99.54
3832	99.59
3831	99.63
3830	99.66
3829	99.68
3828	99.69
3827	99.68
3826	99.67
3825	99.64
3824	99.6
3823	99.56
3822	99.53
3821	99.5
3820	99.46
3819	99.43
3818	99.41
3817	99.41
3816	99.42
3815	99.43
3814	99.45
3813	99.47
3812	99.48
3811	99.49
3810	99.49
3809	99.47
3808	99.45
3807	99.43
3806	99.4
3805	99.36
3804	99.31
3803	99.27
3802	99.24
3801	99.22
3800	99.21
3799	99.22
3798	99.24
3797	99.28
3796	99.33
3795	99.39
3794	99.45
3793	99.5
3792	99.55
3791	99.59
3790	99.61
3789	99.63
3788	99.63
3787	99.62
3786	99.61
3785	99.59
3784	99.56
3783	99.53
3782	99.5
3781	99.47
3780	99.45
3779	99.43
3778	99.42
3777	99.41
3776	99.39
3775	99.39
3774	99.38
3773	99.38
3772	99.37
3771	99.38
3770	99.39
3769	99.4
3768	99.41
3767	99.42
3766	99.43
3765	99.43
3764	99.42
3763	99.41
3762	99.44
3761	99.43
3760	99.43
3759	99.42
3758	99.41
3757	99.4
3756	99.39
3755	99.38
3754	99.37
3753	99.37
3752	99.38
3751	99.39
3750	99.41
3749	99.43
3748	99.44
3747	99.43
3746	99.44
3745	99.47
3744	99.51
3743	99.54
3742	99.57
3741	99.59
3740	99.6
3739	99.61
3738	99.61
3737	99.6
3736	99.58
3735	99.57
3734	99.55
3733	99.54
3732	99.53
3731	99.53
3730	99.53
3729	99.54
3728	99.55
3727	99.55
3726	99.56
3725	99.56
3724	99.56
3723	99.54
3722	99.51
3721	99.47
3720	99.41
3719	99.34
3718	99.25
3717	99.15
3716	99.05
3715	98.94
3714	98.84
3713	98.75
3712	98.67
3711	98.6
3710	98.54
3709	98.49
3708	98.43
3707	98.38
3706	98.32
3705	98.26
3704	98.18
3703	98.09
3702	97.97
3701	97.84
3700	97.68
3699	97.49
3698	97.29
3697	97.07
3696	96.84
3695	96.61
3694	96.37
3693	96.12
3692	95.88
3691	95.65
3690	95.42
3689	95.21
3688	95.02
3687	94.83
3686	94.66
3685	94.48
3684	94.3
3683	94.11
3682	93.91
3681	93.7
3680	93.48
3679	93.25
3678	93.02
3677	92.8
3676	92.59
3675	92.38
3674	92.17
3673	91.96
3672	91.76
3671	91.57
3670	91.38
3669	91.18
3668	90.98
3667	90.77
3666	90.55
3665	90.3
3664	90.01
3663	89.68
3662	89.31
3661	88.91
3660	88.47
3659	88
3658	87.52
3657	87.02
3656	86.51
3655	86
3654	85.48
3653	84.97
3652	84.47
3651	83.98
3650	83.51
3649	83.06
3648	82.63
3647	82.21
3646	81.79
3645	81.37
3644	80.94
3643	80.49
3642	80.03
3641	79.54
3640	79.03
3639	78.51
3638	77.96
3637	77.39
3636	76.81
3635	76.21
3634	75.6
3633	74.98
3632	74.36
3631	73.74
3630	73.14
3629	72.55
3628	71.96
3627	71.39
3626	70.83
3625	70.28
3624	69.73
3623	69.19
3622	68.65
3621	68.11
3620	67.58
3619	67.05
3618	66.53
3617	66.01
3616	65.49
3615	64.98
3614	64.47
3613	63.96
3612	63.46
3611	62.96
3610	62.47
3609	61.98
3608	61.51
3607	61.03
3606	60.56
3605	60.1
3604	59.63
3603	59.16
3602	58.69
3601	58.22
3600	57.75
3599	57.28
3598	56.81
3597	56.34
3596	55.87
3595	55.41
3594	54.94
3593	54.48
3592	54.03
3591	53.58
3590	53.14
3589	52.71
3588	52.28
3587	51.87
3586	51.47
3585	51.07
3584	50.69
3583	50.31
3582	49.94
3581	49.58
3580	49.21
3579	48.85
3578	48.49
3577	48.13
3576	47.76
3575	47.4
3574	47.04
3573	46.68
3572	46.32
3571	45.96
3570	45.6
3569	45.24
3568	44.9
3567	44.56
3566	44.23
3565	43.9
3564	43.58
3563	43.27
3562	42.96
3561	42.65
3560	42.35
3559	42.04
3558	41.74
3557	41.44
3556	41.13
3555	40.82
3554	40.51
3553	40.2
3552	39.88
3551	39.57
3550	39.26
3549	38.96
3548	38.66
3547	38.36
3546	38.07
3545	37.78
3544	37.51
3543	37.24
3542	36.98
3541	36.73
3540	36.49
3539	36.25
3538	36.01
3537	35.78
3536	35.55
3535	35.32
3534	35.09
3533	34.86
3532	34.63
3531	34.4
3530	34.17
3529	33.94
3528	33.71
3527	33.48
3526	33.25
3525	33.02
3524	32.79
3523	32.57
3522	32.34
3521	32.13
3520	31.91
3519	31.7
3518	31.49
3517	31.27
3516	31.06
3515	30.85
3514	30.64
3513	30.42
3512	30.21
3511	30
3510	29.79
3509	29.58
3508	29.37
3507	29.16
3506	28.95
3505	28.74
3504	28.54
3503	28.34
3502	28.14
3501	27.95
3500	27.77
3499	27.59
3498	27.41
3497	27.23
3496	27.06
3495	26.89
3494	26.73
3493	26.57
3492	26.41
3491	26.25
3490	26.09
3489	25.93
3488	25.77
3487	25.62
3486	25.47
3485	25.32
3484	25.17
3483	25.03
3482	24.88
3481	24.74
3480	24.6
3479	24.45
3478	24.32
3477	24.18
3476	24.04
3475	23.91
3474	23.78
3473	23.65
3472	23.52
3471	23.39
3470	23.27
3469	23.15
3468	23.04
3467	22.94
3466	22.84
3465	22.75
3464	22.67
3463	22.59
3462	22.51
3461	22.43
3460	22.36
3459	22.29
3458	22.23
3457	22.16
3456	22.1
3455	22.04
3454	21.98
3453	21.91
3452	21.85
3451	21.79
3450	21.72
3449	21.66
3448	21.59
3447	21.53
3446	21.47
3445	21.4
3444	21.34
3443	21.28
3442	21.23
3441	21.17
3440	21.12
3439	21.07
3438	21.02
3437	20.98
3436	20.95
3435	20.92
3434	20.91
3433	20.9
3432	20.89
3431	20.9
3430	20.91
3429	20.92
3428	20.94
3427	20.97
3426	21
3425	21.03
3424	21.06
3423	21.09
3422	21.12
3421	21.14
3420	21.17
3419	21.2
3418	21.22
3417	21.25
3416	21.27
3415	21.3
3414	21.32
3413	21.34
3412	21.36
3411	21.38
3410	21.41
3409	21.43
3408	21.46
3407	21.49
3406	21.53
3405	21.56
3404	21.59
3403	21.63
3402	21.66
3401	21.71
3400	21.76
3399	21.82
3398	21.88
3397	21.96
3396	22.03
3395	22.12
3394	22.2
3393	22.29
3392	22.38
3391	22.48
3390	22.59
3389	22.7
3388	22.82
3387	22.93
3386	23.05
3385	23.16
3384	23.27
3383	23.38
3382	23.49
3381	23.6
3380	23.7
3379	23.8
3378	23.9
3377	24
3376	24.1
3375	24.2
3374	24.3
3373	24.4
3372	24.5
3371	24.61
3370	24.72
3369	24.84
3368	24.97
3367	25.1
3366	25.24
3365	25.39
3364	25.54
3363	25.69
3362	25.84
3361	25.99
3360	26.14
3359	26.29
3358	26.44
3357	26.6
3356	26.74
3355	26.89
3354	27.03
3353	27.17
3352	27.3
3351	27.44
3350	27.57
3349	27.71
3348	27.85
3347	28
3346	28.14
3345	28.28
3344	28.43
3343	28.57
3342	28.72
3341	28.87
3340	29.02
3339	29.18
3338	29.33
3337	29.49
3336	29.64
3335	29.8
3334	29.96
3333	30.11
3332	30.27
3331	30.42
3330	30.58
3329	30.73
3328	30.88
3327	31.03
3326	31.18
3325	31.33
3324	31.48
3323	31.63
3322	31.77
3321	31.91
3320	32.04
3319	32.17
3318	32.29
3317	32.41
3316	32.52
3315	32.63
3314	32.73
3313	32.83
3312	32.93
3311	33.02
3310	33.12
3309	33.21
3308	33.3
3307	33.4
3306	33.5
3305	33.61
3304	33.72
3303	33.84
3302	33.96
3301	34.08
3300	34.2
3299	34.32
3298	34.44
3297	34.55
3296	34.67
3295	34.79
3294	34.9
3293	35.01
3292	35.12
3291	35.23
3290	35.34
3289	35.45
3288	35.55
3287	35.66
3286	35.76
3285	35.87
3284	35.96
3283	36.06
3282	36.15
3281	36.24
3280	36.32
3279	36.41
3278	36.48
3277	36.56
3276	36.63
3275	36.71
3274	36.78
3273	36.86
3272	36.93
3271	37.01
3270	37.1
3269	37.19
3268	37.29
3267	37.39
3266	37.49
3265	37.59
3264	37.69
3263	37.79
3262	37.9
3261	38
3260	38.1
3259	38.2
3258	38.3
3257	38.39
3256	38.48
3255	38.58
3254	38.67
3253	38.76
3252	38.85
3251	38.94
3250	39.03
3249	39.12
3248	39.21
3247	39.31
3246	39.4
3245	39.49
3244	39.59
3243	39.68
3242	39.78
3241	39.87
3240	39.97
3239	40.06
3238	40.16
3237	40.26
3236	40.35
3235	40.45
3234	40.56
3233	40.66
3232	40.77
3231	40.88
3230	41
3229	41.11
3228	41.23
3227	41.35
3226	41.47
3225	41.59
3224	41.71
3223	41.83
3222	41.95
3221	42.08
3220	42.2
3219	42.32
3218	42.44
3217	42.56
3216	42.68
3215	42.81
3214	42.93
3213	43.06
3212	43.19
3211	43.32
3210	43.45
3209	43.58
3208	43.72
3207	43.85
3206	43.99
3205	44.13
3204	44.26
3203	44.4
3202	44.54
3201	44.68
3200	44.82
3199	44.96
3198	45.11
3197	45.25
3196	45.4
3195	45.54
3194	45.69
3193	45.83
3192	45.98
3191	46.13
3190	46.27
3189	46.42
3188	46.57
3187	46.72
3186	46.86
3185	47.01
3184	47.16
3183	47.3
3182	47.45
3181	47.59
3180	47.74
3179	47.89
3178	48.03
3177	48.18
3176	48.32
3175	48.47
3174	48.61
3173	48.75
3172	48.9
3171	49.04
3170	49.18
3169	49.32
3168	49.46
3167	49.6
3166	49.73
3165	49.87
3164	49.99
3163	50.12
3162	50.24
3161	50.37
3160	50.49
3159	50.61
3158	50.73
3157	50.85
3156	50.97
3155	51.09
3154	51.22
3153	51.34
3152	51.47
3151	51.6
3150	51.74
3149	51.87
3148	52.01
3147	52.15
3146	52.29
3145	52.43
3144	52.57
3143	52.71
3142	52.85
3141	52.98
3140	53.12
3139	53.26
3138	53.4
3137	53.54
3136	53.67
3135	53.81
3134	53.94
3133	54.07
3132	54.2
3131	54.32
3130	54.43
3129	54.54
3128	54.65
3127	54.75
3126	54.85
3125	54.95
3124	55.04
3123	55.13
3122	55.22
3121	55.31
3120	55.41
3119	55.51
3118	55.63
3117	55.75
3116	55.88
3115	56.03
3114	56.18
3113	56.34
3112	56.5
3111	56.66
3110	56.82
3109	56.99
3108	57.16
3107	57.33
3106	57.5
3105	57.67
3104	57.83
3103	57.99
3102	58.14
3101	58.28
3100	58.43
3099	58.56
3098	58.7
3097	58.83
3096	58.96
3095	59.08
3094	59.19
3093	59.3
3092	59.4
3091	59.5
3090	59.59
3089	59.69
3088	59.78
3087	59.87
3086	59.97
3085	60.07
3084	60.17
3083	60.27
3082	60.39
3081	60.5
3080	60.63
3079	60.75
3078	60.89
3077	61.03
3076	61.18
3075	61.33
3074	61.48
3073	61.63
3072	61.78
3071	61.93
3070	62.07
3069	62.21
3068	62.35
3067	62.49
3066	62.62
3065	62.76
3064	62.89
3063	63.02
3062	63.14
3061	63.26
3060	63.38
3059	63.5
3058	63.61
3057	63.72
3056	63.83
3055	63.93
3054	64.04
3053	64.13
3052	64.23
3051	64.32
3050	64.41
3049	64.5
3048	64.6
3047	64.69
3046	64.78
3045	64.87
3044	64.97
3043	65.06
3042	65.16
3041	65.27
3040	65.37
3039	65.49
3038	65.6
3037	65.71
3036	65.81
3035	65.92
3034	66.02
3033	66.13
3032	66.24
3031	66.34
3030	66.45
3029	66.54
3028	66.64
3027	66.72
3026	66.8
3025	66.87
3024	66.94
3023	67
3022	67.06
3021	67.12
3020	67.18
3019	67.24
3018	67.29
3017	67.35
3016	67.41
3015	67.47
3014	67.53
3013	67.61
3012	67.68
3011	67.77
3010	67.86
3009	67.95
3008	68.05
3007	68.14
3006	68.23
3005	68.31
3004	68.39
3003	68.46
3002	68.53
3001	68.59
3000	68.65
2999	68.7
2998	68.74
2997	68.78
2996	68.81
2995	68.84
2994	68.86
2993	68.89
2992	68.91
2991	68.93
2990	68.95
2989	68.96
2988	68.98
2987	68.99
2986	68.99
2985	68.99
2984	68.99
2983	68.98
2982	68.97
2981	68.96
2980	68.94
2979	68.92
2978	68.9
2977	68.88
2976	68.86
2975	68.84
2974	68.82
2973	68.8
2972	68.78
2971	68.76
2970	68.75
2969	68.73
2968	68.72
2967	68.71
2966	68.7
2965	68.69
2964	68.69
2963	68.68
2962	68.68
2961	68.69
2960	68.69
2959	68.69
2958	68.7
2957	68.7
2956	68.7
2955	68.7
2954	68.7
2953	68.7
2952	68.69
2951	68.68
2950	68.67
2949	68.65
2948	68.63
2947	68.6
2946	68.57
2945	68.53
2944	68.5
2943	68.46
2942	68.42
2941	68.37
2940	68.32
2939	68.27
2938	68.22
2937	68.16
2936	68.1
2935	68.05
2934	67.99
2933	67.93
2932	67.87
2931	67.82
2930	67.77
2929	67.73
2928	67.69
2927	67.67
2926	67.66
2925	67.67
2924	67.69
2923	67.73
2922	67.79
2921	67.88
2920	67.99
2919	68.13
2918	68.29
2917	68.47
2916	68.67
2915	68.89
2914	69.13
2913	69.38
2912	69.64
2911	69.91
2910	70.18
2909	70.45
2908	70.71
2907	70.96
2906	71.21
2905	71.44
2904	71.66
2903	71.88
2902	72.08
2901	72.27
2900	72.46
2899	72.64
2898	72.81
2897	72.99
2896	73.16
2895	73.33
2894	73.5
2893	73.68
2892	73.85
2891	74.03
2890	74.2
2889	74.37
2888	74.54
2887	74.71
2886	74.87
2885	75.02
2884	75.16
2883	75.3
2882	75.43
2881	75.56
2880	75.68
2879	75.79
2878	75.89
2877	75.99
2876	76.09
2875	76.18
2874	76.26
2873	76.35
2872	76.43
2871	76.51
2870	76.59
2869	76.66
2868	76.72
2867	76.78
2866	76.84
2865	76.88
2864	76.93
2863	76.97
2862	77
2861	77.04
2860	77.08
2859	77.12
2858	77.17
2857	77.24
2856	77.33
2855	77.44
2854	77.58
2853	77.74
2852	77.93
2851	78.16
2850	78.41
2849	78.69
2848	79
2847	79.33
2846	79.68
2845	80.04
2844	80.41
2843	80.79
2842	81.16
2841	81.52
2840	81.88
2839	82.22
2838	82.56
2837	82.88
2836	83.19
2835	83.49
2834	83.77
2833	84.04
2832	84.29
2831	84.54
2830	84.78
2829	85.01
2828	85.23
2827	85.45
2826	85.66
2825	85.87
2824	86.07
2823	86.26
2822	86.45
2821	86.64
2820	86.82
2819	87
2818	87.18
2817	87.36
2816	87.54
2815	87.71
2814	87.89
2813	88.06
2812	88.23
2811	88.4
2810	88.56
2809	88.73
2808	88.89
2807	89.06
2806	89.22
2805	89.38
2804	89.53
2803	89.69
2802	89.84
2801	89.98
2800	90.13
2799	90.27
2798	90.41
2797	90.55
2796	90.69
2795	90.83
2794	90.97
2793	91.1
2792	91.23
2791	91.36
2790	91.49
2789	91.62
2788	91.75
2787	91.88
2786	92
2785	92.13
2784	92.25
2783	92.36
2782	92.48
2781	92.59
2780	92.7
2779	92.81
2778	92.91
2777	93.02
2776	93.12
2775	93.23
2774	93.33
2773	93.44
2772	93.54
2771	93.65
2770	93.76
2769	93.86
2768	93.97
2767	94.08
2766	94.19
2765	94.3
2764	94.41
2763	94.52
2762	94.63
2761	94.73
2760	94.84
2759	94.94
2758	95.04
2757	95.13
2756	95.23
2755	95.32
2754	95.41
2753	95.51
2752	95.6
2751	95.69
2750	95.77
2749	95.86
2748	95.94
2747	96.03
2746	96.12
2745	96.2
2744	96.29
2743	96.38
2742	96.47
2741	96.55
2740	96.64
2739	96.72
2738	96.8
2737	96.89
2736	96.97
2735	97.05
2734	97.13
2733	97.21
2732	97.28
2731	97.36
2730	97.43
2729	97.5
2728	97.57
2727	97.65
2726	97.72
2725	97.79
2724	97.86
2723	97.94
2722	98.01
2721	98.08
2720	98.15
2719	98.23
2718	98.3
2717	98.37
2716	98.44
2715	98.51
2714	98.57
2713	98.64
2712	98.7
2711	98.77
2710	98.83
2709	98.89
2708	98.95
2707	99.02
2706	99.08
2705	99.14
2704	99.2
2703	99.26
2702	99.32
2701	99.39
2700	99.45
2699	99.49
2698	99.53
2697	99.56
2696	99.58
2695	99.6
2694	99.6
2693	99.6
2692	99.6
2691	99.59
2690	99.58
2689	99.56
2688	99.54
2687	99.52
2686	99.5
2685	99.47
2684	99.45
2683	99.43
2682	99.42
2681	99.4
2680	99.39
2679	99.39
2678	99.38
2677	99.38
2676	99.38
2675	99.39
2674	99.39
2673	99.39
2672	99.39
2671	99.4
2670	99.41
2669	99.41
2668	99.42
2667	99.42
2666	99.43
2665	99.44
2664	99.44
2663	99.45
2662	99.45
2661	99.46
2660	99.46
2659	99.46
2658	99.47
2657	99.47
2656	99.47
2655	99.48
2654	99.48
2653	99.48
2652	99.48
2651	99.48
2650	99.49
2649	99.49
2648	99.49
2647	99.49
2646	99.49
2645	99.49
2644	99.49
2643	99.49
2642	99.48
2641	99.48
2640	99.48
2639	99.48
2638	99.47
2637	99.47
2636	99.46
2635	99.46
2634	99.45
2633	99.45
2632	99.45
2631	99.44
2630	99.44
2629	99.43
2628	99.43
2627	99.44
2626	99.44
2625	99.44
2624	99.43
2623	99.43
2622	99.43
2621	99.42
2620	99.42
2619	99.42
2618	99.42
2617	99.41
2616	99.41
2615	99.41
2614	99.41
2613	99.41
2612	99.4
2611	99.4
2610	99.4
2609	99.4
2608	99.4
2607	99.4
2606	99.4
2605	99.4
2604	99.39
2603	99.39
2602	99.39
2601	99.39
2600	99.39
2599	99.39
2598	99.39
2597	99.38
2596	99.38
2595	99.38
2594	99.38
2593	99.38
2592	99.39
2591	99.39
2590	99.39
2589	99.4
2588	99.4
2587	99.41
2586	99.41
2585	99.41
2584	99.42
2583	99.42
2582	99.42
2581	99.42
2580	99.42
2579	99.42
2578	99.42
2577	99.42
2576	99.42
2575	99.41
2574	99.41
2573	99.41
2572	99.4
2571	99.4
2570	99.4
2569	99.4
2568	99.39
2567	99.39
2566	99.39
2565	99.39
2564	99.39
2563	99.39
2562	99.39
2561	99.39
2560	99.39
2559	99.39
2558	99.39
2557	99.4
2556	99.4
2555	99.4
2554	99.41
2553	99.41
2552	99.41
2551	99.41
2550	99.39
2549	99.39
2548	99.39
2547	99.39
2546	99.39
2545	99.38
2544	99.38
2543	99.38
2542	99.38
2541	99.38
2540	99.38
2539	99.38
2538	99.38
2537	99.38
2536	99.38
2535	99.38
2534	99.38
2533	99.38
2532	99.38
2531	99.38
2530	99.38
2529	99.38
2528	99.39
2527	99.39
2526	99.39
2525	99.39
2524	99.39
2523	99.4
2522	99.4
2521	99.4
2520	99.41
2519	99.41
2518	99.42
2517	99.42
2516	99.43
2515	99.44
2514	99.44
2513	99.45
2512	99.46
2511	99.46
2510	99.47
2509	99.47
2508	99.48
2507	99.48
2506	99.49
2505	99.49
2504	99.49
2503	99.49
2502	99.5
2501	99.5
2500	99.5
2499	99.5
2498	99.5
2497	99.5
2496	99.5
2495	99.5
2494	99.5
2493	99.5
2492	99.49
2491	99.49
2490	99.49
2489	99.48
2488	99.48
2487	99.48
2486	99.47
2485	99.47
2484	99.46
2483	99.46
2482	99.46
2481	99.46
2480	99.46
2479	99.46
2478	99.46
2477	99.45
2476	99.45
2475	99.45
2474	99.45
2473	99.44
2472	99.44
2471	99.44
2470	99.43
2469	99.42
2468	99.42
2467	99.41
2466	99.41
2465	99.4
2464	99.4
2463	99.39
2462	99.39
2461	99.38
2460	99.38
2459	99.37
2458	99.37
2457	99.36
2456	99.36
2455	99.36
2454	99.36
2453	99.36
2452	99.35
2451	99.36
2450	99.36
2449	99.36
2448	99.36
2447	99.36
2446	99.37
2445	99.37
2444	99.37
2443	99.37
2442	99.37
2441	99.37
2440	99.37
2439	99.37
2438	99.37
2437	99.37
2436	99.37
2435	99.37
2434	99.36
2433	99.36
2432	99.36
2431	99.36
2430	99.36
2429	99.35
2428	99.35
2427	99.36
2426	99.36
2425	99.36
2424	99.37
2423	99.39
2422	99.4
2421	99.41
2420	99.42
2419	99.43
2418	99.44
2417	99.45
2416	99.46
2415	99.47
2414	99.48
2413	99.49
2412	99.5
2411	99.51
2410	99.51
2409	99.52
2408	99.53
2407	99.54
2406	99.54
2405	99.55
2404	99.56
2403	99.56
2402	99.57
2401	99.57
2400	99.58
2399	99.58
2398	99.58
2397	99.58
2396	99.58
2395	99.57
2394	99.56
2393	99.54
2392	99.51
2391	99.47
2390	99.42
2389	99.35
2388	99.27
2387	99.17
2386	99.05
2385	98.92
2384	98.78
2383	98.62
2382	98.46
2381	98.29
2380	98.12
2379	97.94
2378	97.77
2377	97.6
2376	97.44
2375	97.29
2374	97.15
2373	97.02
2372	96.91
2371	96.8
2370	96.71
2369	96.63
2368	96.57
2367	96.53
2366	96.51
2365	96.51
2364	96.55
2363	96.62
2362	96.72
2361	96.85
2360	96.99
2359	97.14
2358	97.3
2357	97.47
2356	97.65
2355	97.82
2354	97.97
2353	98.1
2352	98.2
2351	98.25
2350	98.27
2349	98.24
2348	98.18
2347	98.11
2346	98.02
2345	97.92
2344	97.82
2343	97.71
2342	97.61
2341	97.51
2340	97.43
2339	97.37
2338	97.33
2337	97.31
2336	97.31
2335	97.33
2334	97.38
2333	97.43
2332	97.5
2331	97.59
2330	97.68
2329	97.79
2328	97.91
2327	98.03
2326	98.16
2325	98.3
2324	98.44
2323	98.58
2322	98.72
2321	98.85
2320	98.98
2319	99.09
2318	99.18
2317	99.27
2316	99.33
2315	99.38
2314	99.41
2313	99.43
2312	99.43
2311	99.41
2310	99.39
2309	99.36
2308	99.32
2307	99.29
2306	99.25
2305	99.22
2304	99.19
2303	99.17
2302	99.16
2301	99.15
2300	99.15
2299	99.15
2298	99.16
2297	99.18
2296	99.2
2295	99.22
2294	99.24
2293	99.27
2292	99.29
2291	99.32
2290	99.34
2289	99.36
2288	99.38
2287	99.4
2286	99.41
2285	99.42
2284	99.43
2283	99.44
2282	99.45
2281	99.45
2280	99.45
2279	99.45
2278	99.45
2277	99.45
2276	99.45
2275	99.45
2274	99.45
2273	99.45
2272	99.44
2271	99.44
2270	99.44
2269	99.44
2268	99.45
2267	99.45
2266	99.45
2265	99.45
2264	99.45
2263	99.45
2262	99.45
2261	99.45
2260	99.45
2259	99.45
2258	99.45
2257	99.45
2256	99.45
2255	99.45
2254	99.45
2253	99.45
2252	99.45
2251	99.45
2250	99.45
2249	99.45
2248	99.44
2247	99.44
2246	99.44
2245	99.44
2244	99.44
2243	99.44
2242	99.44
2241	99.44
2240	99.44
2239	99.44
2238	99.44
2237	99.44
2236	99.44
2235	99.44
2234	99.44
2233	99.44
2232	99.44
2231	99.44
2230	99.44
2229	99.44
2228	99.44
2227	99.44
2226	99.44
2225	99.44
2224	99.44
2223	99.44
2222	99.45
2221	99.45
2220	99.45
2219	99.45
2218	99.45
2217	99.45
2216	99.45
2215	99.45
2214	99.45
2213	99.45
2212	99.45
2211	99.45
2210	99.45
2209	99.45
2208	99.45
2207	99.45
2206	99.45
2205	99.45
2204	99.45
2203	99.45
2202	99.45
2201	99.45
2200	99.45
2199	99.46
2198	99.46
2197	99.46
2196	99.46
2195	99.46
2194	99.46
2193	99.46
2192	99.46
2191	99.46
2190	99.46
2189	99.46
2188	99.45
2187	99.45
2186	99.45
2185	99.45
2184	99.45
2183	99.45
2182	99.45
2181	99.45
2180	99.45
2179	99.45
2178	99.46
2177	99.46
2176	99.46
2175	99.46
2174	99.46
2173	99.46
2172	99.46
2171	99.45
2170	99.45
2169	99.45
2168	99.45
2167	99.45
2166	99.45
2165	99.44
2164	99.44
2163	99.44
2162	99.44
2161	99.44
2160	99.44
2159	99.43
2158	99.43
2157	99.43
2156	99.43
2155	99.43
2154	99.43
2153	99.42
2152	99.42
2151	99.42
2150	99.42
2149	99.42
2148	99.42
2147	99.42
2146	99.42
2145	99.42
2144	99.42
2143	99.42
2142	99.42
2141	99.42
2140	99.41
2139	99.41
2138	99.42
2137	99.42
2136	99.42
2135	99.43
2134	99.43
2133	99.43
2132	99.44
2131	99.44
2130	99.44
2129	99.44
2128	99.45
2127	99.45
2126	99.45
2125	99.45
2124	99.45
2123	99.45
2122	99.45
2121	99.45
2120	99.45
2119	99.45
2118	99.45
2117	99.45
2116	99.45
2115	99.45
2114	99.45
2113	99.45
2112	99.44
2111	99.44
2110	99.44
2109	99.44
2108	99.44
2107	99.44
2106	99.45
2105	99.45
2104	99.46
2103	99.46
2102	99.47
2101	99.47
2100	99.47
2099	99.48
2098	99.48
2097	99.49
2096	99.49
2095	99.5
2094	99.5
2093	99.5
2092	99.51
2091	99.51
2090	99.52
2089	99.52
2088	99.52
2087	99.52
2086	99.52
2085	99.52
2084	99.52
2083	99.52
2082	99.52
2081	99.52
2080	99.51
2079	99.51
2078	99.51
2077	99.51
2076	99.5
2075	99.5
2074	99.5
2073	99.5
2072	99.49
2071	99.49
2070	99.49
2069	99.48
2068	99.48
2067	99.48
2066	99.47
2065	99.47
2064	99.47
2063	99.46
2062	99.46
2061	99.46
2060	99.46
2059	99.45
2058	99.45
2057	99.45
2056	99.45
2055	99.45
2054	99.45
2053	99.45
2052	99.45
2051	99.45
2050	99.45
2049	99.45
2048	99.45
2047	99.45
2046	99.45
2045	99.45
2044	99.45
2043	99.45
2042	99.46
2041	99.46
2040	99.46
2039	99.46
2038	99.47
2037	99.47
2036	99.47
2035	99.47
2034	99.47
2033	99.47
2032	99.48
2031	99.48
2030	99.48
2029	99.48
2028	99.49
2027	99.49
2026	99.49
2025	99.49
2024	99.5
2023	99.5
2022	99.5
2021	99.5
2020	99.5
2019	99.5
2018	99.5
2017	99.5
2016	99.51
2015	99.51
2014	99.51
2013	99.52
2012	99.52
2011	99.52
2010	99.52
2009	99.53
2008	99.53
2007	99.53
2006	99.53
2005	99.53
2004	99.53
2003	99.53
2002	99.53
2001	99.53
[truncated: 1,601 more rows]

## Sheet: FT-IR spectra of Mag@RF SB-Cu
4000	99.84
3999	99.84
3998	99.84
3997	99.84
3996	99.84
3995	99.84
3994	99.83
3993	99.83
3992	99.83
3991	99.83
3990	99.83
3989	99.83
3988	99.83
3987	99.83
3986	99.83
3985	99.83
3984	99.83
3983	99.83
3982	99.83
3981	99.83
3980	99.83
3979	99.83
3978	99.84
3977	99.84
3976	99.84
3975	99.84
3974	99.83
3973	99.83
3972	99.83
3971	99.83
3970	99.83
3969	99.82
3968	99.82
3967	99.82
3966	99.81
3965	99.81
3964	99.81
3963	99.81
3962	99.81
3961	99.81
3960	99.81
3959	99.81
3958	99.81
3957	99.81
3956	99.81
3955	99.81
3954	99.81
3953	99.81
3952	99.81
3951	99.81
3950	99.81
3949	99.81
3948	99.81
3947	99.81
3946	99.8
3945	99.8
3944	99.8
3943	99.79
3942	99.79
3941	99.79
3940	99.78
3939	99.78
3938	99.78
3937	99.78
3936	99.78
3935	99.78
3934	99.78
3933	99.79
3932	99.79
3931	99.79
3930	99.79
3929	99.8
3928	99.8
3927	99.8
3926	99.8
3925	99.81
3924	99.81
3923	99.81
3922	99.81
3921	99.81
3920	99.81
3919	99.81
3918	99.81
3917	99.81
3916	99.81
3915	99.81
3914	99.81
3913	99.82
3912	99.82
3911	99.83
3910	99.83
3909	99.84
3908	99.85
3907	99.86
3906	99.87
3905	99.88
3904	99.89
3903	99.89
3902	99.9
3901	99.9
3900	99.9
3899	99.9
3898	99.9
3897	99.9
3896	99.89
3895	99.89
3894	99.88
3893	99.87
3892	99.86
3891	99.85
3890	99.84
3889	99.83
3888	99.82
3887	99.81
3886	99.81
3885	99.8
3884	99.79
3883	99.79
3882	99.79
3881	99.79
3880	99.79
3879	99.79
3878	99.79
3877	99.79
3876	99.8
3875	99.8
3874	99.81
3873	99.81
3872	99.81
3871	99.82
3870	99.82
3869	99.83
3868	99.83
3867	99.83
3866	99.84
3865	99.84
3864	99.84
3863	99.85
3862	99.85
3861	99.86
3860	99.86
3859	99.86
3858	99.86
3857	99.87
3856	99.87
3855	99.86
3854	99.86
3853	99.86
3852	99.85
3851	99.85
3850	99.84
3849	99.84
3848	99.83
3847	99.83
3846	99.83
3845	99.83
3844	99.83
3843	99.83
3842	99.83
3841	99.83
3840	99.83
3839	99.84
3838	99.84
3837	99.84
3836	99.84
3835	99.84
3834	99.84
3833	99.83
3832	99.82
3831	99.82
3830	99.81
3829	99.8
3828	99.79
3827	99.78
3826	99.78
3825	99.77
3824	99.77
3823	99.77
3822	99.77
3821	99.77
3820	99.77
3819	99.78
3818	99.79
3817	99.79
3816	99.8
3815	99.81
3814	99.82
3813	99.83
3812	99.84
3811	99.85
3810	99.86
3809	99.87
3808	99.87
3807	99.88
3806	99.88
3805	99.88
3804	99.88
3803	99.88
3802	99.88
3801	99.87
3800	99.87
3799	99.86
3798	99.85
3797	99.83
3796	99.82
3795	99.8
3794	99.79
3793	99.77
3792	99.76
3791	99.75
3790	99.73
3789	99.72
3788	99.71
3787	99.71
3786	99.7
3785	99.7
3784	99.7
3783	99.7
3782	99.7
3781	99.7
3780	99.7
3779	99.71
3778	99.71
3777	99.71
3776	99.71
3775	99.71
3774	99.7
3773	99.7
3772	99.69
3771	99.68
3770	99.67
3769	99.65
3768	99.64
3767	99.63
3766	99.61
3765	99.6
3764	99.59
3763	99.59
3762	99.58
3761	99.59
3760	99.59
3759	99.6
3758	99.62
3757	99.64
3756	99.66
3755	99.69
3754	99.72
3753	99.75
3752	99.78
3751	99.81
3750	99.84
3749	99.87
3748	99.89
3747	99.91
3746	99.92
3745	99.93
3744	99.93
3743	99.93
3742	99.93
3741	99.93
3740	99.92
3739	99.91
3738	99.91
3737	99.9
3736	99.89
3735	99.89
3734	99.89
3733	99.89
3732	99.89
3731	99.89
3730	99.89
3729	99.9
3728	99.9
3727	99.9
3726	99.91
3725	99.91
3724	99.91
3723	99.91
3722	99.91
3721	99.91
3720	99.91
3719	99.91
3718	99.91
3717	99.9
3716	99.9
3715	99.89
3714	99.89
3713	99.88
3712	99.88
3711	99.87
3710	99.86
3709	99.86
3708	99.85
3707	99.84
3706	99.83
3705	99.82
3704	99.81
3703	99.8
3702	99.79
3701	99.78
3700	99.78
3699	99.77
3698	99.77
3697	99.77
3696	99.78
3695	99.78
3694	99.79
3693	99.8
3692	99.8
3691	99.81
3690	99.82
3689	99.83
3688	99.84
3687	99.84
3686	99.84
3685	99.84
3684	99.84
3683	99.83
3682	99.82
3681	99.81
3680	99.78
3679	99.75
3678	99.72
3677	99.67
3676	99.62
3675	99.55
3674	99.47
3673	99.39
3672	99.29
3671	99.18
3670	99.06
3669	98.92
3668	98.78
3667	98.63
3666	98.47
3665	98.31
3664	98.14
3663	97.97
3662	97.79
3661	97.61
3660	97.43
3659	97.25
3658	97.06
3657	96.88
3656	96.7
3655	96.51
3654	96.32
3653	96.12
3652	95.92
3651	95.72
3650	95.51
3649	95.29
3648	95.06
3647	94.83
3646	94.59
3645	94.34
3644	94.09
3643	93.83
3642	93.57
3641	93.31
3640	93.04
3639	92.78
3638	92.51
3637	92.24
3636	91.98
3635	91.71
3634	91.45
3633	91.19
3632	90.93
3631	90.67
3630	90.41
3629	90.14
3628	89.88
3627	89.62
3626	89.35
3625	89.09
3624	88.81
3623	88.54
3622	88.26
3621	87.98
3620	87.7
3619	87.41
3618	87.12
3617	86.83
3616	86.53
3615	86.24
3614	85.94
3613	85.63
3612	85.33
3611	85.02
3610	84.72
3609	84.41
3608	84.1
3607	83.79
3606	83.49
3605	83.18
3604	82.87
3603	82.57
3602	82.27
3601	81.97
3600	81.67
3599	81.38
3598	81.09
3597	80.8
3596	80.51
3595	80.23
3594	79.95
3593	79.67
3592	79.39
3591	79.12
3590	78.84
3589	78.57
3588	78.3
3587	78.02
3586	77.75
3585	77.48
3584	77.21
3583	76.95
3582	76.68
3581	76.42
3580	76.16
3579	75.9
3578	75.64
3577	75.39
3576	75.13
3575	74.88
3574	74.63
3573	74.39
3572	74.14
3571	73.9
3570	73.66
3569	73.42
3568	73.18
3567	72.94
3566	72.7
3565	72.46
3564	72.22
3563	71.98
3562	71.75
3561	71.51
3560	71.27
3559	71.03
3558	70.79
3557	70.56
3556	70.32
3555	70.08
3554	69.85
3553	69.62
3552	69.39
3551	69.16
3550	68.93
3549	68.7
3548	68.48
3547	68.26
3546	68.04
3545	67.82
3544	67.61
3543	67.4
3542	67.19
3541	66.98
3540	66.78
3539	66.57
3538	66.37
3537	66.18
3536	65.98
3535	65.79
3534	65.59
3533	65.4
3532	65.21
3531	65.02
3530	64.83
3529	64.64
3528	64.45
3527	64.26
3526	64.07
3525	63.88
3524	63.68
3523	63.49
3522	63.3
3521	63.11
3520	62.91
3519	62.72
3518	62.53
3517	62.33
3516	62.13
3515	61.94
3514	61.74
3513	61.54
3512	61.35
3511	61.15
3510	60.95
3509	60.75
3508	60.56
3507	60.36
3506	60.16
3505	59.96
3504	59.76
3503	59.56
3502	59.37
3501	59.17
3500	58.97
3499	58.78
3498	58.58
3497	58.39
3496	58.19
3495	58
3494	57.81
3493	57.62
3492	57.43
3491	57.25
3490	57.06
3489	56.88
3488	56.7
3487	56.53
3486	56.35
3485	56.18
3484	56.01
3483	55.85
3482	55.69
3481	55.53
3480	55.37
3479	55.22
3478	55.06
3477	54.92
3476	54.77
3475	54.63
3474	54.49
3473	54.35
3472	54.22
3471	54.09
3470	53.96
3469	53.84
3468	53.72
3467	53.6
3466	53.49
3465	53.37
3464	53.27
3463	53.16
3462	53.05
3461	52.95
3460	52.85
3459	52.75
3458	52.65
3457	52.56
3456	52.46
3455	52.36
3454	52.27
3453	52.17
3452	52.08
3451	51.99
3450	51.9
3449	51.81
3448	51.72
3447	51.63
3446	51.55
3445	51.47
3444	51.39
3443	51.31
3442	51.25
3441	51.18
3440	51.12
3439	51.07
3438	51.02
3437	50.98
3436	50.95
3435	50.92
3434	50.9
3433	50.88
3432	50.88
3431	50.87
3430	50.88
3429	50.89
3428	50.9
3427	50.92
3426	50.94
3425	50.97
3424	51
3423	51.03
3422	51.06
3421	51.1
3420	51.13
3419	51.17
3418	51.21
3417	51.24
3416	51.28
3415	51.32
3414	51.36
3413	51.4
3412	51.44
3411	51.48
3410	51.52
3409	51.56
3408	51.61
3407	51.66
3406	51.71
3405	51.77
3404	51.82
3403	51.89
3402	51.95
3401	52.02
3400	52.1
3399	52.18
3398	52.26
3397	52.35
3396	52.44
3395	52.54
3394	52.64
3393	52.75
3392	52.86
3391	52.97
3390	53.09
3389	53.2
3388	53.32
3387	53.45
3386	53.57
3385	53.69
3384	53.81
3383	53.94
3382	54.06
3381	54.18
3380	54.31
3379	54.43
3378	54.55
3377	54.68
3376	54.8
3375	54.93
3374	55.06
3373	55.19
3372	55.32
3371	55.45
3370	55.59
3369	55.73
3368	55.87
3367	56.02
3366	56.17
3365	56.32
3364	56.47
3363	56.63
3362	56.78
3361	56.94
3360	57.1
3359	57.26
3358	57.41
3357	57.57
3356	57.73
3355	57.88
3354	58.03
3353	58.18
3352	58.33
3351	58.48
3350	58.63
3349	58.78
3348	58.92
3347	59.07
3346	59.22
3345	59.36
3344	59.51
3343	59.65
3342	59.8
3341	59.95
3340	60.09
3339	60.24
3338	60.39
3337	60.54
3336	60.69
3335	60.84
3334	60.99
3333	61.14
3332	61.29
3331	61.44
3330	61.59
3329	61.74
3328	61.88
3327	62.03
3326	62.18
3325	62.32
3324	62.46
3323	62.6
3322	62.74
3321	62.87
3320	63.01
3319	63.14
3318	63.27
3317	63.39
3316	63.52
3315	63.64
3314	63.77
3313	63.89
3312	64.01
3311	64.13
3310	64.24
3309	64.36
3308	64.48
3307	64.6
3306	64.72
3305	64.84
3304	64.96
3303	65.08
3302	65.2
3301	65.32
3300	65.44
3299	65.56
3298	65.69
3297	65.81
3296	65.92
3295	66.04
3294	66.16
3293	66.27
3292	66.38
3291	66.49
3290	66.6
3289	66.71
3288	66.81
3287	66.92
3286	67.02
3285	67.12
3284	67.22
3283	67.31
3282	67.41
3281	67.51
3280	67.6
3279	67.7
3278	67.8
3277	67.89
3276	67.99
3275	68.08
3274	68.18
3273	68.28
3272	68.37
3271	68.47
3270	68.57
3269	68.66
3268	68.76
3267	68.86
3266	68.95
3265	69.05
3264	69.15
3263	69.24
3262	69.34
3261	69.44
3260	69.54
3259	69.64
3258	69.74
3257	69.84
3256	69.94
3255	70.04
3254	70.14
3253	70.24
3252	70.35
3251	70.45
3250	70.56
3249	70.66
3248	70.77
3247	70.87
3246	70.98
3245	71.08
3244	71.19
3243	71.3
3242	71.41
3241	71.51
3240	71.62
3239	71.73
3238	71.84
3237	71.95
3236	72.06
3235	72.17
3234	72.28
3233	72.39
3232	72.5
3231	72.62
3230	72.73
3229	72.84
3228	72.96
3227	73.07
3226	73.19
3225	73.31
3224	73.43
3223	73.54
3222	73.66
3221	73.78
3220	73.91
3219	74.03
3218	74.15
3217	74.28
3216	74.4
3215	74.52
3214	74.65
3213	74.78
3212	74.9
3211	75.03
3210	75.16
3209	75.29
3208	75.42
3207	75.54
3206	75.67
3205	75.8
3204	75.93
3203	76.06
3202	76.19
3201	76.32
3200	76.45
3199	76.58
3198	76.71
3197	76.85
3196	76.98
3195	77.12
3194	77.25
3193	77.39
3192	77.53
3191	77.67
3190	77.81
3189	77.95
3188	78.1
3187	78.24
3186	78.38
3185	78.53
3184	78.67
3183	78.81
3182	78.96
3181	79.1
3180	79.24
3179	79.38
3178	79.52
3177	79.66
3176	79.81
3175	79.95
3174	80.09
3173	80.23
3172	80.37
3171	80.51
3170	80.65
3169	80.79
3168	80.93
3167	81.07
3166	81.21
3165	81.35
3164	81.49
3163	81.63
3162	81.77
3161	81.91
3160	82.05
3159	82.19
3158	82.33
3157	82.48
3156	82.62
3155	82.76
3154	82.9
3153	83.04
3152	83.19
3151	83.33
3150	83.48
3149	83.62
3148	83.76
3147	83.91
3146	84.06
3145	84.2
3144	84.35
3143	84.49
3142	84.64
3141	84.78
3140	84.93
3139	85.08
3138	85.22
3137	85.37
3136	85.51
3135	85.65
3134	85.79
3133	85.93
3132	86.07
3131	86.21
3130	86.35
3129	86.48
3128	86.61
3127	86.75
3126	86.88
3125	87.01
3124	87.14
3123	87.27
3122	87.4
3121	87.53
3120	87.66
3119	87.79
3118	87.92
3117	88.06
3116	88.19
3115	88.33
3114	88.47
3113	88.61
3112	88.75
3111	88.89
3110	89.03
3109	89.17
3108	89.31
3107	89.46
3106	89.6
3105	89.73
3104	89.87
3103	90.01
3102	90.14
3101	90.27
3100	90.4
3099	90.52
3098	90.65
3097	90.77
3096	90.88
3095	91
3094	91.11
3093	91.22
3092	91.33
3091	91.43
3090	91.54
3089	91.64
3088	91.74
3087	91.84
3086	91.94
3085	92.04
3084	92.14
3083	92.24
3082	92.33
3081	92.43
3080	92.53
3079	92.62
3078	92.72
3077	92.81
3076	92.9
3075	93
3074	93.09
3073	93.18
3072	93.28
3071	93.37
3070	93.46
3069	93.55
3068	93.64
3067	93.73
3066	93.82
3065	93.91
3064	94
3063	94.1
3062	94.19
3061	94.28
3060	94.38
3059	94.48
3058	94.58
3057	94.68
3056	94.78
3055	94.88
3054	94.99
3053	95.1
3052	95.21
3051	95.32
3050	95.43
3049	95.54
3048	95.65
3047	95.77
3046	95.88
3045	95.99
3044	96.1
3043	96.21
3042	96.32
3041	96.43
3040	96.53
3039	96.63
3038	96.73
3037	96.83
3036	96.92
3035	97.01
3034	97.1
3033	97.18
3032	97.27
3031	97.34
3030	97.42
3029	97.5
3028	97.57
3027	97.64
3026	97.7
3025	97.77
3024	97.84
3023	97.9
3022	97.97
3021	98.03
3020	98.1
3019	98.16
3018	98.23
3017	98.29
3016	98.36
3015	98.43
3014	98.49
3013	98.56
3012	98.63
3011	98.7
3010	98.77
3009	98.84
3008	98.9
3007	98.97
3006	99.04
3005	99.1
3004	99.16
3003	99.22
3002	99.28
3001	99.34
3000	99.39
2999	99.44
2998	99.49
2997	99.54
2996	99.58
2995	99.62
2994	99.65
2993	99.68
2992	99.7
2991	99.71
2990	99.72
2989	99.73
2988	99.72
2987	99.71
2986	99.68
2985	99.65
2984	99.61
2983	99.56
2982	99.51
2981	99.44
2980	99.36
2979	99.28
2978	99.19
2977	99.09
2976	98.99
2975	98.88
2974	98.76
2973	98.64
2972	98.52
2971	98.4
2970	98.27
2969	98.14
2968	98.01
2967	97.88
2966	97.75
2965	97.62
2964	97.48
2963	97.34
2962	97.2
2961	97.06
2960	96.91
2959	96.75
2958	96.6
2957	96.43
2956	96.26
2955	96.08
2954	95.9
2953	95.71
2952	95.51
2951	95.31
2950	95.1
2949	94.89
2948	94.68
2947	94.46
2946	94.25
2945	94.03
2944	93.82
2943	93.61
2942	93.41
2941	93.22
2940	93.03
2939	92.86
2938	92.7
2937	92.55
2936	92.41
2935	92.29
2934	92.19
2933	92.1
2932	92.03
2931	91.97
2930	91.93
2929	91.91
2928	91.9
2927	91.91
2926	91.93
2925	91.96
2924	92.01
2923	92.07
2922	92.13
2921	92.2
2920	92.28
2919	92.36
2918	92.45
2917	92.54
2916	92.63
2915	92.72
2914	92.81
2913	92.9
2912	92.99
2911	93.07
2910	93.15
2909	93.22
2908	93.29
2907	93.35
2906	93.41
2905	93.46
2904	93.51
2903	93.55
2902	93.58
2901	93.61
2900	93.63
2899	93.64
2898	93.66
2897	93.66
2896	93.67
2895	93.67
2894	93.66
2893	93.66
2892	93.65
2891	93.64
2890	93.63
2889	93.62
2888	93.61
2887	93.59
2886	93.58
2885	93.57
2884	93.56
2883	93.55
2882	93.54
2881	93.53
2880	93.51
2879	93.5
2878	93.49
2877	93.48
2876	93.46
2875	93.45
2874	93.43
2873	93.42
2872	93.4
2871	93.39
2870	93.37
2869	93.36
2868	93.35
2867	93.35
2866	93.34
2865	93.34
2864	93.35
2863	93.36
2862	93.38
2861	93.41
2860	93.44
2859	93.48
2858	93.53
2857	93.58
2856	93.65
2855	93.72
2854	93.79
2853	93.88
2852	93.97
2851	94.06
2850	94.16
2849	94.27
2848	94.38
2847	94.5
2846	94.61
2845	94.73
2844	94.86
2843	94.98
2842	95.11
2841	95.23
2840	95.36
2839	95.49
2838	95.62
2837	95.74
2836	95.87
2835	96
2834	96.12
2833	96.25
2832	96.37
2831	96.49
2830	96.61
2829	96.73
2828	96.85
2827	96.96
2826	97.08
2825	97.19
2824	97.3
2823	97.4
2822	97.51
2821	97.61
2820	97.71
2819	97.81
2818	97.9
2817	98
2816	98.09
2815	98.17
2814	98.26
2813	98.34
2812	98.41
2811	98.49
2810	98.56
2809	98.63
2808	98.7
2807	98.76
2806	98.82
2805	98.88
2804	98.94
2803	98.99
2802	99.04
2801	99.09
2800	99.14
2799	99.19
2798	99.23
2797	99.27
2796	99.31
2795	99.35
2794	99.38
2793	99.42
2792	99.45
2791	99.48
2790	99.51
2789	99.54
2788	99.57
2787	99.59
2786	99.62
2785	99.64
2784	99.66
2783	99.68
2782	99.7
2781	99.72
2780	99.74
2779	99.75
2778	99.77
2777	99.78
2776	99.79
2775	99.81
2774	99.82
2773	99.83
2772	99.84
2771	99.85
2770	99.86
2769	99.86
2768	99.87
2767	99.87
2766	99.88
2765	99.88
2764	99.89
2763	99.89
2762	99.89
2761	99.89
2760	99.89
2759	99.89
2758	99.89
2757	99.89
2756	99.9
2755	99.9
2754	99.9
2753	99.9
2752	99.9
2751	99.9
2750	99.91
2749	99.91
2748	99.91
2747	99.91
2746	99.92
2745	99.92
2744	99.92
2743	99.92
2742	99.92
2741	99.92
2740	99.92
2739	99.91
2738	99.91
2737	99.91
2736	99.91
2735	99.9
2734	99.9
2733	99.9
2732	99.89
2731	99.89
2730	99.88
2729	99.88
2728	99.87
2727	99.87
2726	99.87
2725	99.86
2724	99.86
2723	99.86
2722	99.86
2721	99.85
2720	99.85
2719	99.85
2718	99.85
2717	99.85
2716	99.85
2715	99.85
2714	99.85
2713	99.85
2712	99.85
2711	99.85
2710	99.85
2709	99.85
2708	99.85
2707	99.85
2706	99.85
2705	99.85
2704	99.85
2703	99.85
2702	99.85
2701	99.85
2700	99.86
2699	99.86
2698	99.86
2697	99.86
2696	99.86
2695	99.86
2694	99.87
2693	99.87
2692	99.87
2691	99.87
2690	99.87
2689	99.87
2688	99.88
2687	99.88
2686	99.88
2685	99.88
2684	99.88
2683	99.88
2682	99.88
2681	99.88
2680	99.88
2679	99.88
2678	99.88
2677	99.88
2676	99.88
2675	99.88
2674	99.88
2673	99.88
2672	99.87
2671	99.87
2670	99.87
2669	99.86
2668	99.86
2667	99.86
2666	99.85
2665	99.85
2664	99.85
2663	99.84
2662	99.84
2661	99.84
2660	99.84
2659	99.84
2658	99.84
2657	99.84
2656	99.84
2655	99.84
2654	99.84
2653	99.84
2652	99.84
2651	99.84
2650	99.84
2649	99.84
2648	99.85
2647	99.85
2646	99.85
2645	99.85
2644	99.85
2643	99.85
2642	99.85
2641	99.85
2640	99.85
2639	99.85
2638	99.84
2637	99.84
2636	99.84
2635	99.84
2634	99.84
2633	99.84
2632	99.84
2631	99.84
2630	99.85
2629	99.85
2628	99.85
2627	99.85
2626	99.85
2625	99.85
2624	99.85
2623	99.85
2622	99.85
2621	99.85
2620	99.86
2619	99.86
2618	99.86
2617	99.86
2616	99.86
2615	99.86
2614	99.86
2613	99.87
2612	99.87
2611	99.87
2610	99.87
2609	99.87
2608	99.87
2607	99.87
2606	99.87
2605	99.87
2604	99.87
2603	99.87
2602	99.86
2601	99.86
2600	99.86
2599	99.86
2598	99.86
2597	99.86
2596	99.86
2595	99.86
2594	99.86
2593	99.86
2592	99.86
2591	99.86
2590	99.85
2589	99.85
2588	99.85
2587	99.85
2586	99.85
2585	99.85
2584	99.84
2583	99.84
2582	99.84
2581	99.84
2580	99.83
2579	99.83
2578	99.83
2577	99.83
2576	99.82
2575	99.82
2574	99.82
2573	99.81
2572	99.81
2571	99.81
2570	99.8
2569	99.8
2568	99.8
2567	99.79
2566	99.79
2565	99.79
2564	99.79
2563	99.78
2562	99.78
2561	99.78
2560	99.78
2559	99.78
2558	99.78
2557	99.78
2556	99.78
2555	99.78
2554	99.78
2553	99.78
2552	99.79
2551	99.79
2550	99.79
2549	99.79
2548	99.8
2547	99.8
2546	99.81
2545	99.81
2544	99.81
2543	99.82
2542	99.82
2541	99.83
2540	99.84
2539	99.84
2538	99.85
2537	99.86
2536	99.86
2535	99.87
2534	99.88
2533	99.88
2532	99.89
2531	99.9
2530	99.9
2529	99.91
2528	99.91
2527	99.92
2526	99.92
2525	99.93
2524	99.93
2523	99.93
2522	99.93
2521	99.93
2520	99.93
2519	99.93
2518	99.93
2517	99.93
2516	99.93
2515	99.93
2514	99.93
2513	99.93
2512	99.93
2511	99.93
2510	99.94
2509	99.94
2508	99.94
2507	99.94
2506	99.94
2505	99.94
2504	99.94
2503	99.95
2502	99.95
2501	99.95
2500	99.95
2499	99.95
2498	99.95
2497	99.95
2496	99.95
2495	99.95
2494	99.95
2493	99.95
2492	99.95
2491	99.95
2490	99.95
2489	99.95
2488	99.95
2487	99.94
2486	99.94
2485	99.94
2484	99.94
2483	99.94
2482	99.94
2481	99.94
2480	99.94
2479	99.94
2478	99.93
2477	99.93
2476	99.93
2475	99.93
2474	99.93
2473	99.93
2472	99.93
2471	99.93
2470	99.93
2469	99.93
2468	99.93
2467	99.92
2466	99.92
2465	99.92
2464	99.92
2463	99.92
2462	99.92
2461	99.91
2460	99.91
2459	99.91
2458	99.91
2457	99.91
2456	99.91
2455	99.91
2454	99.9
2453	99.9
2452	99.9
2451	99.9
2450	99.9
2449	99.89
2448	99.89
2447	99.89
2446	99.89
2445	99.88
2444	99.88
2443	99.88
2442	99.88
2441	99.87
2440	99.87
2439	99.87
2438	99.86
2437	99.86
2436	99.86
2435	99.86
2434	99.85
2433	99.85
2432	99.85
2431	99.85
2430	99.85
2429	99.85
2428	99.85
2427	99.85
2426	99.85
2425	99.85
2424	99.86
2423	99.86
2422	99.86
2421	99.87
2420	99.87
2419	99.87
2418	99.88
2417	99.88
2416	99.88
2415	99.89
2414	99.89
2413	99.89
2412	99.9
2411	99.9
2410	99.91
2409	99.91
2408	99.92
2407	99.92
2406	99.92
2405	99.93
2404	99.93
2403	99.93
2402	99.94
2401	99.94
2400	99.94
2399	99.94
2398	99.94
2397	99.93
2396	99.93
2395	99.93
2394	99.92
2393	99.92
2392	99.91
2391	99.91
2390	99.9
2389	99.9
2388	99.89
2387	99.89
2386	99.88
2385	99.88
2384	99.87
2383	99.87
2382	99.87
2381	99.87
2380	99.86
2379	99.86
2378	99.87
2377	99.87
2376	99.87
2375	99.87
2374	99.88
2373	99.89
2372	99.89
2371	99.9
2370	99.91
2369	99.93
2368	99.94
2367	99.95
2366	99.96
2365	99.97
2364	99.98
2363	99.99
2362	99.99
2361	99.99
2360	99.98
2359	99.97
2358	99.95
2357	99.93
2356	99.9
2355	99.87
2354	99.83
2353	99.79
2352	99.75
2351	99.71
2350	99.67
2349	99.63
2348	99.59
2347	99.57
2346	99.54
2345	99.53
2344	99.53
2343	99.53
2342	99.54
2341	99.56
2340	99.59
2339	99.62
2338	99.66
2337	99.7
2336	99.74
2335	99.78
2334	99.83
2333	99.87
2332	99.9
2331	99.93
2330	99.96
2329	99.98
2328	99.99
2327	100
2326	100
2325	100
2324	99.98
2323	99.97
2322	99.95
2321	99.93
2320	99.9
2319	99.87
2318	99.84
2317	99.8
2316	99.77
2315	99.74
2314	99.7
2313	99.67
2312	99.64
2311	99.62
2310	99.59
2309	99.58
2308	99.56
2307	99.55
2306	99.54
2305	99.53
2304	99.53
2303	99.54
2302	99.54
2301	99.55
2300	99.57
2299	99.58
2298	99.6
2297	99.62
2296	99.64
2295	99.66
2294	99.68
2293	99.7
2292	99.72
2291	99.74
2290	99.76
2289	99.77
2288	99.79
2287	99.8
2286	99.81
2285	99.82
2284	99.83
2283	99.84
2282	99.84
2281	99.84
2280	99.85
2279	99.85
2278	99.85
2277	99.84
2276	99.84
2275	99.84
2274	99.84
2273	99.83
2272	99.83
2271	99.83
2270	99.83
2269	99.83
2268	99.82
2267	99.82
2266	99.82
2265	99.82
2264	99.83
2263	99.83
2262	99.83
2261	99.83
2260	99.83
2259	99.83
2258	99.84
2257	99.84
2256	99.84
2255	99.84
2254	99.85
2253	99.85
2252	99.85
2251	99.85
2250	99.86
2249	99.86
2248	99.86
2247	99.86
2246	99.86
2245	99.86
2244	99.86
2243	99.86
2242	99.86
2241	99.86
2240	99.86
2239	99.86
2238	99.86
2237	99.86
2236	99.86
2235	99.86
2234	99.86
2233	99.85
2232	99.85
2231	99.85
2230	99.85
2229	99.85
2228	99.85
2227	99.85
2226	99.85
2225	99.85
2224	99.85
2223	99.85
2222	99.84
2221	99.84
2220	99.84
2219	99.84
2218	99.84
2217	99.84
2216	99.84
2215	99.84
2214	99.84
2213	99.84
2212	99.84
2211	99.84
2210	99.84
2209	99.84
2208	99.84
2207	99.84
2206	99.84
2205	99.84
2204	99.84
2203	99.84
2202	99.84
2201	99.84
2200	99.85
2199	99.85
2198	99.85
2197	99.85
2196	99.85
2195	99.85
2194	99.85
2193	99.85
2192	99.85
2191	99.85
2190	99.85
2189	99.85
2188	99.85
2187	99.85
2186	99.85
2185	99.85
2184	99.85
2183	99.85
2182	99.85
2181	99.85
2180	99.85
2179	99.85
2178	99.85
2177	99.85
2176	99.85
2175	99.85
2174	99.85
2173	99.85
2172	99.85
2171	99.85
2170	99.85
2169	99.85
2168	99.85
2167	99.85
2166	99.85
2165	99.85
2164	99.85
2163	99.85
2162	99.85
2161	99.85
2160	99.85
2159	99.85
2158	99.85
2157	99.85
2156	99.85
2155	99.85
2154	99.84
2153	99.84
2152	99.84
2151	99.84
2150	99.84
2149	99.84
2148	99.83
2147	99.83
2146	99.83
2145	99.83
2144	99.83
2143	99.83
2142	99.83
2141	99.83
2140	99.83
2139	99.83
2138	99.83
2137	99.83
2136	99.83
2135	99.83
2134	99.84
2133	99.84
2132	99.84
2131	99.84
2130	99.84
2129	99.84
2128	99.84
2127	99.84
2126	99.84
2125	99.84
2124	99.84
2123	99.84
2122	99.84
2121	99.84
2120	99.84
2119	99.84
2118	99.84
2117	99.84
2116	99.83
2115	99.83
2114	99.83
2113	99.83
2112	99.83
2111	99.83
2110	99.83
2109	99.83
2108	99.83
2107	99.83
2106	99.83
2105	99.83
2104	99.83
2103	99.83
2102	99.83
2101	99.83
2100	99.83
2099	99.83
2098	99.83
2097	99.83
2096	99.83
2095	99.83
2094	99.83
2093	99.83
2092	99.83
2091	99.83
2090	99.83
2089	99.83
2088	99.83
2087	99.83
2086	99.83
2085	99.83
2084	99.83
2083	99.83
2082	99.83
2081	99.82
2080	99.82
2079	99.82
2078	99.82
2077	99.82
2076	99.83
2075	99.83
2074	99.83
2073	99.83
2072	99.83
2071	99.83
2070	99.83
2069	99.83
2068	99.83
2067	99.83
2066	99.83
2065	99.83
2064	99.83
2063	99.83
2062	99.83
2061	99.83
2060	99.83
2059	99.83
2058	99.83
2057	99.82
2056	99.82
2055	99.82
2054	99.82
2053	99.82
2052	99.82
2051	99.82
2050	99.82
2049	99.82
2048	99.82
2047	99.82
2046	99.82
2045	99.81
2044	99.81
2043	99.81
2042	99.81
2041	99.81
2040	99.81
2039	99.81
2038	99.81
2037	99.81
2036	99.81
2035	99.81
2034	99.81
2033	99.81
2032	99.81
2031	99.81
2030	99.81
2029	99.81
2028	99.81
2027	99.81
2026	99.81
2025	99.81
2024	99.82
2023	99.82
2022	99.82
2021	99.82
2020	99.82
2019	99.82
2018	99.83
2017	99.83
2016	99.83
2015	99.83
2014	99.83
2013	99.83
2012	99.84
2011	99.84
2010	99.84
2009	99.84
2008	99.84
2007	99.84
2006	99.84
2005	99.84
2004	99.84
2003	99.84
2002	99.84
2001	99.84
[truncated: 1,601 more rows]

## Sheet: PXRD pattern of Mag@RF SB-Cu
10	13.5605
10.02	2.59127
10.04	-3.66369
10.06	-4.74723
10.08	-2.85933
10.1	-3.14286
10.12	1.7736
10.14	2.17578
10.16	2.40654
10.18	1.60872
10.2	3.78233
10.22	1.67022
10.24	2.58669
10.26	2.07458
10.28	-0.15181
10.3	-0.63534
10.32	-3.34744
10.34	-0.65955
10.36	-3.05737
10.38	-0.68376
10.4	-0.59586
10.42	3.37775
10.44	-0.9915
10.46	0.86782
10.48	-2.70142
10.5	1.24362
10.52	-2.06849
10.54	4.24798
10.56	7.16444
10.58	7.68091
10.6	0.99738
10.62	-0.000441189
10.64	2.31603
10.66	13.6611
10.68	15.749
10.7	11.9797
10.72	2.63904
10.74	2.18407
10.76	3.81483
10.78	6.07415
10.8	4.76205
10.82	-2.43577
10.84	-2.80502
10.86	1.99716
10.88	6.97077
10.9	7.05867
10.92	3.63228
10.94	3.34874
10.96	3.66521
10.98	4.21025
11	7.98386
11.02	9.98604
11.04	7.1025
11.06	-0.72389
11.08	-7.03599
11.1	-3.51952
11.12	3.1398
11.14	6.11341
11.16	0.68702
11.18	-0.88223
11.2	-3.13719
11.22	-5.33501
11.24	-3.53283
11.26	0.04078
11.28	2.01439
11.3	4.70229
11.32	2.73304
11.34	0.53522
11.36	-1.8626
11.38	2.05387
11.4	4.19891
11.42	3.71537
11.44	0.83184
11.46	1.00545
11.48	0.20763
11.5	-0.21876
11.52	-0.10229
11.54	6.87132
11.56	6.84493
11.58	6.56139
11.6	4.84929
11.62	-0.00567
11.64	-4.51778
11.66	-3.57274
11.68	-1.45627
11.7	-1.25409
11.72	1.14809
11.74	2.03599
11.76	5.12388
11.78	6.24035
11.8	4.21396
11.82	-0.81243
11.84	-1.72454
11.86	1.19193
11.88	10.6512
11.9	12.1677
11.92	-0.40153
11.94	-7.31363
11.96	2.08855
11.98	3.14787
12	-2.7928
12.02	-5.39062
12.04	0.52584
12.06	0.89945
12.08	-2.32694
12.1	-2.55333
12.12	2.84885
12.14	10.4225
12.16	5.25322
12.18	-0.97317
12.2	0.42901
12.22	-0.51167
12.24	3.14766
12.26	3.54984
12.28	4.15202
12.3	-2.90294
12.32	-3.04362
12.34	-1.84144
12.36	5.38931
12.38	10.7343
12.4	9.53653
12.42	3.48157
12.44	-0.0591
12.46	0.77165
12.48	5.63097
12.5	8.8903
12.52	3.66391
12.54	-1.41963
12.56	0.58255
12.58	7.32759
12.6	6.41549
12.62	1.90338
12.64	-2.12301
12.66	-3.92083
12.68	-0.17579
12.7	2.54068
12.72	0.42857
12.74	-4.62639
12.76	-1.68135
12.78	-1.0506
12.8	-0.13413
12.82	1.21091
12.84	1.8988
12.86	-0.07044
12.88	-4.38255
12.9	-7.29465
12.92	-5.6639
12.94	1.68114
12.96	0.7976
12.98	-0.05736
13	-3.76946
13.02	1.28986
13.04	-1.62224
13.06	4.15137
13.08	6.86783
13.1	9.27001
13.12	8.4722
13.14	8.0458
13.16	3.90513
13.18	-0.14983
13.2	-0.34765
13.22	3.42596
13.24	1.19957
13.26	4.63032
13.28	2.46107
13.3	2.80611
13.32	-1.24885
13.34	-1.27524
13.36	-3.21592
13.38	-4.78516
13.4	-3.49727
13.42	-1.66652
13.44	-0.75005
13.46	-0.60501
13.48	0.62574
13.5	-0.02922
13.52	0.08725
13.54	5.518
13.56	7.03447
13.58	5.00807
13.6	3.38168
13.62	5.64101
13.64	2.04319
13.66	2.44537
13.68	3.27612
13.7	4.93545
13.72	0.33763
13.74	-0.34591
13.76	-1.45801
13.78	3.14417
13.8	9.08921
13.82	6.29139
13.84	5.60786
13.86	0.72432
13.88	2.84079
13.9	3.44297
13.92	4.84515
13.94	-1.26695
13.96	-3.00763
13.98	1.76598
14	4.13959
14.02	2.39892
14.04	0.25824
14.06	0.46042
14.08	-1.30883
14.1	1.66478
14.12	-2.24732
14.14	2.64057
14.16	-3.3001
14.18	1.18779
14.2	-1.55288
14.22	1.62073
14.24	-3.37709
14.26	-0.80348
14.28	2.9987
14.3	7.62945
14.32	4.03163
14.34	4.49096
14.36	4.52171
14.38	4.43818
14.4	-0.38821
14.42	-2.90032
14.44	-0.06957
14.46	0.78976
14.48	5.22051
14.5	3.02269
14.52	4.48201
14.54	0.45562
14.56	3.82923
14.58	2.03141
14.6	-0.50926
14.62	-3.19279
14.64	2.06653
14.66	5.15443
14.68	7.35661
14.7	8.01593
14.72	9.78954
14.74	2.22029
14.76	-2.32038
14.78	-1.74677
14.8	1.71255
14.82	-2.77098
14.84	-0.7688
14.86	7.34766
14.88	9.12127
14.9	3.09488
14.92	4.26849
14.94	0.09925
14.96	-0.32714
14.98	-2.09639
15	-0.43707
15.02	-1.37774
15.04	1.59587
15.06	5.11233
15.08	5.57166
15.1	5.48812
15.12	0.0903
15.14	-2.25037
15.16	-2.87676
15.18	-1.04601
15.2	5.95617
15.22	4.30121
15.24	1.58911
15.26	-1.66586
15.28	-2.2351
15.3	-2.86149
15.32	0.76926
15.34	5.37144
15.36	2.17362
15.38	3.7758
15.4	3.2637
15.42	9.15159
15.44	4.29663
15.46	2.69881
15.48	-2.61329
15.5	7.53175
15.52	5.47678
15.54	6.70754
15.56	2.39543
15.58	7.02618
15.6	2.45694
15.62	0.20197
15.64	3.14701
15.66	6.60634
15.68	6.89423
15.7	8.03927
15.72	11.0129
15.74	7.98649
15.76	2.81724
15.78	0.90514
15.8	-1.40697
15.82	-0.0905
15.84	0.62597
15.86	4.34243
15.88	1.37319
15.9	-1.8532
15.92	-6.62245
15.94	-1.5917
15.96	-0.9038
15.98	-2.21591
16	-3.4423
16.02	0.55988
16.04	2.27635
16.06	6.04996
16.08	2.50928
16.1	1.99718
16.12	4.62793
16.14	6.23011
16.16	-2.93914
16.18	1.23447
16.2	7.03665
16.22	9.55312
16.24	0.78387
16.26	-1.27109
16.28	0.44538
16.3	7.64756
16.32	7.7926
16.34	2.88049
16.36	0.13982
16.38	-1.82943
16.4	-2.25582
16.42	1.57493
16.44	5.14854
16.46	1.03644
16.48	-1.2471
16.5	-0.24491
16.52	4.84298
16.54	3.01659
16.56	5.1902
16.58	4.04952
16.6	3.42313
16.62	1.3396
16.64	9.05607
16.66	9.02968
16.68	5.03186
16.7	1.49118
16.72	6.09336
16.74	3.55269
16.76	1.04058
16.78	-0.70009
16.8	2.81637
16.82	4.58998
16.84	5.99216
16.86	3.45149
16.88	6.11081
16.9	3.45585
16.92	-0.14197
16.94	2.1745
16.96	6.60525
16.98	5.32172
17	-5.93324
17.02	-8.15963
17.04	-5.55745
17.06	6.53044
17.08	8.30405
17.1	7.67766
17.12	4.79413
17.14	8.59631
17.16	8.74135
17.18	9.25781
17.2	5.14571
17.22	5.57646
17.24	6.7215
17.26	5.12368
17.28	-1.33128
17.3	3.24233
17.32	6.10165
17.34	6.50383
17.36	0.84887
17.38	2.82248
17.4	5.56752
17.42	6.79827
17.44	9.08617
17.46	7.97406
17.48	9.46196
17.5	6.007
17.52	8.63775
17.54	7.61136
17.56	7.04211
17.58	7.01572
17.6	7.04647
17.62	4.62008
17.64	3.27943
17.66	4.73869
17.68	5.85489
17.7	8.48521
17.72	5.97266
17.74	4.7744
17.76	0.77614
17.78	5.69217
17.8	7.23677
17.82	7.03851
17.84	3.78311
17.86	1.32771
17.88	1.47231
17.9	2.50263
17.92	5.50437
17.94	4.2204
17.96	9.05071
17.98	12.1382
18	7.8542
18.02	3.02737
18.04	6.82911
18.06	6.31657
18.08	8.06117
18.1	10.2915
18.12	11.1218
18.14	10.4664
18.16	8.611
18.18	12.4985
18.2	13.1573
18.22	15.8448
18.24	11.3037
18.26	12.134
18.28	10.7357
18.3	8.82319
18.32	10.9392
18.34	14.6267
18.36	13.457
18.38	10.1445
18.4	9.37476
18.42	12.5194
18.44	13.6354
18.46	17.2371
18.48	15.7246
18.5	12.4406
18.52	3.81379
18.54	6.01553
18.56	6.98871
18.58	10.219
18.6	9.39219
18.62	11.2511
18.64	7.68139
18.66	4.79742
18.68	6.11345
18.7	4.34376
18.72	4.91693
18.74	9.54725
18.76	10.949
18.78	6.32216
18.8	0.75247
18.82	2.63993
18.84	4.55596
18.86	5.07199
18.88	8.95944
18.9	11.2469
18.92	11.7629
18.94	4.05039
18.96	2.25213
18.98	4.59673
19	3.19847
19.02	8.34307
19.04	8.83053
19.06	14.6323
19.08	6.00544
19.1	5.75004
19.12	2.18036
19.14	5.72496
19.16	2.38384
19.18	5.78558
19.2	8.53018
19.22	9.84621
19.24	7.7051
19.26	5.13541
19.28	4.76573
19.3	6.71033
19.32	6.4835
19.34	5.31381
19.36	5.62984
19.38	10.7459
19.4	6.80475
19.42	7.57792
19.44	4.57967
19.46	6.32427
19.48	3.55458
19.5	7.61347
19.52	6.98664
19.54	10.8741
19.56	11.2473
19.58	13.9347
19.6	9.85075
19.62	3.53821
19.64	0.51138
19.66	4.54169
19.68	7.68629
19.7	7.57375
19.72	5.03263
19.74	4.20581
19.76	1.77898
19.78	3.26643
19.8	4.92532
19.82	9.21278
19.84	7.38595
19.86	11.3877
19.88	9.27515
19.9	9.9626
19.92	6.22149
19.94	9.10895
19.96	7.05355
19.98	3.541
20	7.85703
20.02	7.00163
20.04	9.66052
20.06	6.14797
20.08	7.09257
20.1	2.26574
20.12	0.01034
20.14	-0.98791
20.16	0.8424
20.18	2.90129
20.2	7.87446
20.22	6.13334
20.24	5.99223
20.26	4.07969
20.28	5.82429
20.3	1.91174
20.32	3.48491
20.34	5.31523
20.36	2.17411
20.38	2.97586
20.4	4.9776
20.42	2.83648
20.44	1.83823
20.46	7.89711
20.48	8.956
20.5	2.41488
20.52	4.70234
20.54	6.1898
20.56	5.44868
20.58	4.879
20.6	5.65217
20.62	5.65391
20.64	4.94137
20.66	8.14311
20.68	9.54485
20.7	8.88945
20.72	4.31977
20.74	-1.30706
20.76	-3.64818
20.78	-0.24643
20.8	11.241
20.82	12.6713
20.84	7.84451
20.86	3.36054
20.88	6.39085
20.9	4.64974
20.92	1.68005
20.94	-2.86107
20.96	-2.63075
20.98	1.22813
21	3.74416
21.02	3.57448
21.04	5.2905
21.06	7.57796
21.08	7.86542
21.1	9.35288
21.12	12.4689
21.14	17.5849
21.16	17.5295
21.18	10.0456
21.2	6.70445
21.22	7.10619
21.24	8.7365
21.26	5.05253
21.28	-0.40287
21.3	1.68459
21.32	7.57204
21.34	12.3166
21.36	9.77553
21.38	7.09156
21.4	7.2933
21.42	8.92361
21.44	12.1254
21.46	9.24139
21.48	6.78599
21.5	5.78773
21.52	-0.35339
21.54	-3.06593
21.56	4.07867
21.58	11.309
21.6	9.39644
21.62	8.45533
21.64	3.4285
21.66	0.9731
21.68	0.40341
21.7	4.77658
21.72	4.4069
21.74	5.9515
21.76	3.58181
21.78	0.38355
21.8	3.55672
21.82	4.90132
21.84	3.24592
21.86	4.93338
21.88	7.9637
21.9	6.07972
21.92	0.48147
21.94	-1.11679
21.96	0.31352
21.98	2.71527
22	4.28844
22.02	11.2616
22.04	11.6919
22.06	7.89366
22.08	1.09541
22.1	-0.47428
22.12	3.64175
22.14	6.87206
22.16	9.47381
22.18	3.21841
22.2	2.07729
22.22	-0.72097
22.24	0.53792
22.26	-2.91748
22.28	-1.37288
22.3	3.17172
22.32	8.4306
22.34	5.06092
22.36	4.06266
22.38	11.9787
22.4	13.7233
22.42	12.325
22.44	8.86963
22.46	13.0999
22.48	9.61597
22.5	6.30343
22.52	4.56232
22.54	1.99263
22.56	2.1658
22.58	4.7104
22.6	6.22643
22.62	3.1996
22.64	4.25849
22.66	8.6888
22.68	7.09054
22.7	5.60657
22.72	4.29403
22.74	7.89577
22.76	7.52608
22.78	-0.07217
22.8	-3.92757
22.82	-3.41154
22.84	-2.6098
22.86	-3.49377
22.88	2.13654
22.9	9.05257
22.92	14.54
22.94	9.99891
22.96	4.11494
22.98	3.0024
23	10.9756
23.02	10.663
23.04	7.8362
23.06	4.43794
23.08	5.98254
23.1	2.47
23.12	1.32888
23.14	3.61634
23.16	9.70379
23.18	11.3341
23.2	15.593
23.22	13.6805
23.24	6.45362
23.26	4.99822
23.28	7.54282
23.3	11.3731
23.32	9.66059
23.34	9.66234
23.36	4.60694
23.38	5.35153
23.4	10.5818
23.42	12.5836
23.44	11.3282
23.46	7.81565
23.48	7.58882
23.5	7.19056
23.52	11.7637
23.54	14.1941
23.56	11.8529
23.58	4.16896
23.6	-1.05787
23.62	-2.62755
23.64	4.0599
23.66	8.09022
23.68	8.32053
23.7	6.00799
23.72	6.55259
23.74	10.8972
23.76	8.81322
23.78	8.10067
23.8	8.50242
23.82	13.7899
23.84	14.4773
23.86	15.8505
23.88	8.7951
23.9	10.6254
23.92	12.5986
23.94	16.0289
23.96	12.7735
23.98	8.63239
24	5.29127
24.02	2.92158
24.04	6.69476
24.06	10.2394
24.08	8.18396
24.1	10.1286
24.12	7.47315
24.14	10.1606
24.16	5.4195
24.18	11.8498
24.2	9.82298
24.22	7.99615
24.24	11.5979
24.26	15.4282
24.28	11.7442
24.3	4.74598
24.32	9.3763
24.34	13.0066
24.36	11.0655
24.38	7.49581
24.4	2.58327
24.42	-0.18642
24.44	1.90104
24.46	4.67421
24.48	1.33309
24.5	0.44912
24.52	7.39372
24.54	6.68118
24.56	2.16864
24.58	0.59895
24.6	1.02926
24.62	-1.39757
24.64	-0.48154
24.66	4.69163
24.68	2.66481
24.7	3.20941
24.72	2.98258
24.74	1.95575
24.76	-0.18537
24.78	3.9878
24.8	8.50383
24.82	5.877
24.84	6.05018
24.86	3.68049
24.88	1.7108
24.9	5.36969
24.92	2.45715
24.94	3.03032
24.96	2.63206
24.98	10.5767
25	4.72126
25.02	-0.93414
25.04	-1.81811
25.06	2.4122
25.08	8.52823
25.1	6.15854
25.12	3.90314
25.14	0.33346
25.16	5.99234
25.18	5.30837
25.2	5.28154
25.22	4.45471
25.24	5.34217
25.26	0.22963
25.28	1.71708
25.3	3.9474
25.32	5.77771
25.34	3.06517
25.36	3.35263
25.38	2.61151
25.4	5.29897
25.42	8.07214
25.44	5.93103
25.46	0.04705
25.48	-1.52263
25.5	-0.52089
25.52	1.25228
25.54	-1.80312
25.56	-0.08709
25.58	2.94322
25.6	8.60211
25.62	3.34671
25.64	0.34845
25.66	1.40734
25.68	5.09479
25.7	3.75368
25.72	5.49828
25.74	5.95716
25.76	5.50176
25.78	-1.18221
25.8	2.01954
25.82	6.73556
25.84	12.1944
25.86	4.93905
25.88	-1.65921
25.9	0.82825
25.92	2.80142
25.94	1.80316
25.96	-6.30938
25.98	-1.07907
26	5.26553
26.02	8.49585
26.04	5.06902
26.06	5.09933
26.08	9.81536
26.1	11.36
26.12	7.64742
26.14	2.33487
26.16	-0.06338
26.18	1.90979
26.2	-3.20276
26.22	-4.5153
26.24	2.17216
26.26	10.4882
26.28	9.00422
26.3	4.34882
26.32	4.35056
26.34	2.58087
26.36	0.21119
26.38	1.12721
26.4	4.50039
26.42	5.18784
26.44	2.78958
26.46	2.30561
26.48	1.82164
26.5	0.13767
26.52	1.2537
26.54	1.5983
26.56	2.05718
26.58	3.17321
26.6	4.80353
26.62	15.291
26.64	20.4927
26.66	12.8945
26.68	-0.5895
26.7	0.86938
26.72	7.35684
26.74	7.33001
26.76	7.10318
26.78	8.50492
26.8	6.2781
26.82	1.67984
26.84	-0.46128
26.86	0.59761
26.88	0.05649
26.9	0.02967
26.92	-0.62573
26.94	1.77601
26.96	3.52061
26.98	0.95092
27	-3.87591
27.02	0.15441
27.04	3.69901
27.06	2.70075
27.08	2.01678
27.1	3.13281
27.12	5.13455
27.14	5.96486
27.16	8.22375
27.18	5.42549
27.2	7.17009
27.22	1.8004
27.24	-4.59785
27.26	-5.42468
27.28	0.94849
27.3	3.46452
27.32	2.23769
27.34	4.09657
27.36	4.89832
27.38	5.50006
27.4	1.98752
27.42	0.56069
27.44	2.27672
27.46	3.79274
27.48	3.59449
27.5	5.39623
27.52	6.82654
27.54	2.57114
27.56	1.54431
27.58	3.34606
27.6	2.7478
27.62	-4.76474
27.64	-4.163
27.66	-2.2184
27.68	-2.98809
27.7	-8.07206
27.72	-5.75603
27.74	-2.09714
27.76	0.59031
27.78	5.59206
27.8	4.82237
27.82	3.28125
27.84	-0.40272
27.86	0.31331
27.88	1.71505
27.9	2.65965
27.92	2.63282
27.94	-0.70829
27.96	-1.39226
27.98	-2.53338
28	1.41122
28.02	0.09868
28.04	1.10042
28.06	-0.81212
28.08	2.27534
28.1	-0.32292
28.12	2.93597
28.14	3.25199
28.16	3.73945
28.18	-0.37309
28.2	2.71436
28.22	2.03039
28.24	-1.39644
28.26	-4.70898
28.28	1.09276
28.3	4.40879
28.32	2.12482
28.34	-0.10201
28.36	-2.78598
28.38	-6.01281
28.4	-5.01107
28.42	0.30496
28.44	5.76385
28.46	4.70845
28.48	3.28162
28.5	0.91193
28.52	5.02796
28.54	7.14399
28.56	5.14573
28.58	-2.79538
28.6	-5.30793
28.62	-2.47761
28.64	-0.99015
28.66	-0.7027
28.68	2.95619
28.7	4.90079
28.72	8.90253
28.74	5.98999
28.76	3.50602
28.78	1.79347
28.8	1.59521
28.82	-0.31733
28.84	-1.31559
28.86	2.71473
28.88	2.40219
28.9	4.48964
28.92	4.5771
28.94	2.66456
28.96	-0.9337
28.98	-0.33196
29	-5.18736
29.02	-1.87133
29.04	-3.64102
29.06	1.41787
29.08	2.24818
29.1	5.79278
29.12	3.6231
29.14	1.1677
29.16	2.68372
29.18	-0.40025
29.2	-0.9985
29.22	0.3452
29.24	6.52083
29.26	10.7882
29.28	8.8318
29.3	7.76115
29.32	3.77599
29.34	1.79084
29.36	-1.96575
29.38	4.56338
29.4	8.86393
29.42	8.76449
29.44	4.03647
29.46	2.73703
29.48	3.63759
29.5	4.36672
29.52	7.78156
29.54	2.16783
29.56	-1.18876
29.58	-4.65963
29.6	0.92664
29.62	1.97005
29.64	2.3849
29.66	3.71402
29.68	1.30029
29.7	1.22942
29.72	2.47284
29.74	8.03053
29.76	2.04538
29.78	0.54593
29.8	6.44649
29.82	9.14705
29.84	4.79046
29.86	5.91959
29.88	8.47729
29.9	10.7207
29.92	9.0784
29.94	7.66467
29.96	8.7938
29.98	13.0372
30	16.5092
30.02	14.1812
30.04	19.596
30.06	16.8966
30.08	19.1686
30.1	14.0691
30.12	14.9125
30.14	19.4988
30.16	23.3708
30.18	24.9285
30.2	18.9719
30.22	24.7296
30.24	24.4302
30.26	27.6736
30.28	28.2598
30.3	27.9318
30.32	25.4324
30.34	23.0472
30.36	26.6049
30.38	30.4769
30.4	33.2632
30.42	30.278
30.44	29.0929
30.46	36.5077
30.48	37.4368
30.5	35.366
30.52	30.5237
30.54	29.3956
30.56	29.5819
30.58	33.1968
30.6	33.2973
30.62	30.1979
30.64	29.9556
30.66	24.3133
30.68	17.7853
30.7	16.0287
30.72	17.6721
30.74	21.9441
30.76	23.5875
30.78	17.7166
30.8	9.58859
30.82	12.232
30.84	13.9611
30.86	13.4046
30.88	9.44796
30.9	6.6628
30.92	10.1919
30.94	20.0353
30.96	20.4502
30.98	8.12217
31	4.67987
31.02	14.8947
31.04	15.0524
31.06	10.8673
31.08	7.36781
31.1	5.92551
31.12	-4.20251
31.14	-0.44481
31.16	11.37
31.18	15.6706
31.2	5.34258
31.22	5.0717
31.24	8.08655
31.26	9.50139
31.28	4.20194
31.3	4.55964
31.32	5.71734
31.34	4.73219
31.36	3.80417
31.38	1.87616
31.4	3.37671
31.42	5.42012
31.44	5.37782
31.46	2.47838
31.48	2.06465
31.5	6.25092
31.52	2.75148
31.54	-1.14797
31.56	3.12402
31.58	2.65315
31.6	5.58227
31.62	3.76855
31.64	8.61196
31.66	-0.91606
31.68	-1.2155
31.7	-3.48637
31.72	0.92847
31.74	4.77188
31.76	3.64387
31.78	1.20157
31.8	2.5307
31.82	4.14554
31.84	1.10324
31.86	-2.42478
31.88	-3.83851
31.9	0.57633
31.92	7.07689
31.94	5.17745
31.96	-1.55057
31.98	-2.1643
32	9.7934
32.02	8.77967
32.04	5.9088
32.06	2.38079
32.08	7.2242
32.1	3.66761
32.12	0.88245
32.14	1.2973
32.16	3.42642
32.18	1.38412
32.2	-1.34389
32.22	-0.90048
32.24	0.97151
32.26	0.81492
32.28	4.28691
32.3	2.8446
32.32	-1.48341
32.34	-3.06857
32.36	5.40342
32.38	5.44683
32.4	7.31881
32.42	6.13366
32.44	5.9485
32.46	4.73477
32.48	5.97818
32.5	2.13588
32.52	-1.13499
32.54	0.19414
32.56	7.38041
32.58	6.82382
32.6	2.01009
32.62	-1.57507
32.64	5.66835
32.66	6.48319
32.68	0.58375
32.7	-2.25855
32.72	-1.18657
32.74	-0.82887
32.76	-1.2426
32.78	-1.0849
32.8	-1.67006
32.82	1.45907
32.84	1.61677
32.86	-0.13982
32.88	-2.72498
32.9	-2.25299
32.92	-2.92386
32.94	-2.05188
32.96	0.70582
32.98	1.92066
33	2.87836
33.02	0.23606
33.04	-1.00624
33.06	2.72289
33.08	8.3663
33.1	6.58114
33.12	0.0817
33.14	-2.7606
33.16	-1.54576
33.18	0.1548
33.2	3.85535
33.22	2.52734
33.24	5.14218
33.26	7.64274
33.28	10.8862
33.3	8.04385
33.32	4.94441
33.34	-1.21218
33.36	-0.79734
33.38	0.16036
33.4	7.91806
33.42	6.30433
33.44	1.83346
33.46	-6.00884
33.48	4.006
33.5	5.84941
33.52	3.94997
33.54	-0.00662
33.56	4.17965
33.58	4.93735
33.6	6.72362
33.62	0.28132
33.64	-2.18955
33.66	-2.23185
33.68	3.72585
33.7	2.96926
33.72	3.64125
33.74	-0.6582
33.76	-0.18621
33.78	6.42863
33.8	10.9578
33.82	16.6869
33.84	10.016
33.86	0.20229
33.88	-6.78287
33.9	3.06054
33.92	6.47538
33.94	5.7188
33.96	2.41935
33.98	5.20562
34	10.649
34.02	11.1782
34.04	7.16444
34.06	1.23642
34.08	0.82269
34.1	2.92332
34.12	9.50998
34.14	8.26527
34.16	5.474
34.18	1.25182
34.2	3.00167
34.22	3.92295
34.24	9.98709
34.26	10.3369
34.28	7.6868
34.3	5.7795
34.32	7.44364
34.34	4.13635
34.36	0.45763
34.38	3.77891
34.4	9.18591
34.42	8.90719
34.44	8.99989
34.46	8.8926
34.48	5.55674
34.5	6.24945
34.52	6.51359
34.54	4.72058
34.56	0.67043
34.58	1.67743
34.6	3.57014
34.62	2.83427
34.64	4.89841
34.66	2.47683
34.68	1.65526
34.7	3.26225
34.72	11.9835
34.74	11.6762
34.76	6.08324
34.78	3.29023
34.8	5.38294
34.82	10.5899
34.84	15.3684
34.86	14.7182
34.88	10.4395
34.9	14.3322
34.92	20.8249
34.94	20.2033
34.96	12.2103
34.98	9.30303
35	11.1957
35.02	11.917
35.04	17.7812
35.06	19.1882
35.08	20.7666
35.1	10.345
35.12	14.7234
35.14	18.2447
35.16	25.8231
35.18	18.4873
35.2	18.7514
35.22	18.4155
35.24	22.194
35.26	23.4295
35.28	30.6079
35.3	33.7007
35.32	42.5076
35.34	46.8861
35.36	45.9788
35.38	39.1286
35.4	41.1642
35.42	44.6569
35.44	49.6925
35.46	49.8138
35.48	49.6493
35.5	54.8278
35.52	63.7776
35.54	67.8989
35.56	67.1059
35.58	66.7986
35.6	74.2056
35.62	96.4697
35.64	98.3053
35.66	83.5409
35.68	78.1478
35.7	99.9834
35.72	96.9047
35.74	87.6831
35.76	85.7187
35.78	95.1257
35.8	94.0469
35.82	93.8825
35.84	93.6324
35.86	98.7251
35.88	104.475
35.9	99.4819
35.92	87.1461
35.94	82.6388
35.96	90.96
35.98	96.7956
36	93.2026
36.02	81.9525
36.04	78.6166
36.06	76.8807
36.08	71.1449
36.1	69.609
36.12	61.5589
36.14	58.7373
36.16	54.0586
36.18	58.2941
36.2	50.0154
36.22	50.4224
36.24	45.858
36.26	36.3792
36.28	34.3577
36.3	41.9075
36.32	41.1145
36.34	34.2072
36.36	32.1857
36.38	34.4498
36.4	27.4568
36.42	20.9781
36.44	20.0422
36.46	22.6778
36.48	26.0848
36.5	22.806
36.52	18.013
36.54	15.0772
36.56	13.3699
36.58	12.634
36.6	6.89816
36.62	8.04801
36.64	13.6836
36.66	21.8334
36.68	16.5547
36.7	12.9046
36.72	14.4258
36.74	14.9757
36.76	10.2398
36.78	9.10397
36.8	7.31096
36.82	8.80367
36.84	10.9535
36.86	10.7605
36.88	6.11037
36.9	7.88879
36.92	8.75293
36.94	8.41707
36.96	8.90978
36.98	7.31677
37	8.12377
37.02	7.44505
37.04	9.93776
37.06	9.63046
37.08	12.7232
37.1	6.41588
37.12	1.93716
37.14	-0.74156
37.16	3.03687
37.18	2.67243
37.2	1.47943
37.22	-2.68501
37.24	-0.7923
37.26	7.50041
37.28	6.5074
37.3	5.25726
37.32	7.89282
37.34	6.67125
37.36	2.27824
37.38	0.74238
37.4	2.89223
37.42	1.58494
37.44	0.84908
37.46	0.88464
37.48	3.34878
37.5	4.49863
37.52	4.67705
37.54	4.59833
37.56	6.94816
37.58	6.09713
37.6	7.59295
37.62	3.1229
37.64	-1.80047
37.66	-4.03909
37.68	-0.50628
37.7	6.62653
37.72	9.73077
37.74	5.46358
37.76	3.22496
37.78	4.5292
37.8	9.60487
37.82	4.76625
37.84	3.24191
37.86	2.48901
37.88	4.33611
37.9	4.04034
37.92	4.25887
37.94	5.44882
37.96	1.06735
37.98	-0.85699
38	-1.98132
38.02	0.23721
38.04	1.25573
38.06	-0.18289
38.08	-1.62151
38.1	-0.06013
38.12	2.7584
38.14	2.06264
38.16	0.70973
38.18	4.15683
38.2	7.4325
38.22	5.25102
38.24	-0.15903
38.26	-1.22622
38.28	-2.37912
38.3	-3.5606
38.32	-3.08493
38.34	-2.69498
38.36	-2.27645
38.38	-2.6865
38.4	-2.92512
38.42	-2.22088
38.44	2.19764
38.46	6.9876
38.48	4.14898
38.5	3.22465
38.52	0.15746
38.54	-2.50973
38.56	1.33736
38.58	6.67017
38.6	6.34584
38.62	2.45008
38.64	1.78289
38.66	-0.51287
38.68	1.70565
38.7	7.52418
38.72	9.57127
38.74	8.53265
38.76	3.20832
38.78	-1.54458
38.8	-3.64035
38.82	-0.39325
38.84	-1.8033
38.86	-1.78477
38.88	-1.93768
38.9	-2.00487
38.92	-2.44349
38.94	0.3179
38.96	1.62213
38.98	-1.53077
39	0.7449
39.02	4.59199
39.04	3.95337
39.06	1.45761
39.08	3.27614
39.1	2.63752
39.12	-1.17253
39.14	1.41743
39.16	2.26452
39.18	-0.80267
39.2	-6.29843
39.22	-5.16562
39.24	-6.51852
39.26	-1.04286
39.28	-1.4529
39.3	2.42276
39.32	1.95557
39.34	2.7741
39.36	0.90691
39.38	0.63972
39.4	-0.37033
39.42	-3.32323
39.44	-0.56185
39.46	-1.05761
39.48	2.73234
39.5	0.60801
39.52	1.08367
39.54	-1.38352
39.56	2.09215
39.58	0.65353
39.6	0.90063
39.62	2.7763
39.64	5.88053
39.66	3.41334
39.68	-0.71099
39.7	-3.09246
39.72	-1.6168
39.74	-0.08399
39.76	1.93454
39.78	1.66735
39.8	-3.17127
39.82	-3.6956
39.84	-4.44851
39.86	0.85573
39.88	-1.18289
39.9	0.06421
39.92	-3.51727
39.94	-2.6416
39.96	-2.70879
39.98	-2.40455
40	0.12826
40.02	0.97535
40.04	1.62245
40.06	-0.35903
40.08	-0.96907
40.1	-1.23626
40.12	-3.13202
40.14	-4.39921
40.16	-6.18069
40.18	-5.61931
40.2	1.39922
40.22	6.90345
40.24	4.57912
40.26	-2.17378
40.28	-1.52669
40.3	0.94898
40.32	-3.57535
40.34	-3.47111
40.36	-0.85259
40.38	-2.09121
40.4	1.75589
40.42	6.8887
40.44	9.90722
40.46	2.18289
40.48	1.77284
40.5	-1.26578
40.52	-1.79011
40.54	-3.28587
40.56	0.67551
40.58	2.03689
40.6	2.54113
40.62	2.07394
40.64	3.74961
40.66	2.02528
40.68	1.52951
40.7	-0.93768
40.72	-5.03344
40.74	-3.7292
40.76	1.08933
40.78	0.93642
40.8	-2.38791
40.82	0.00204
40.84	1.84914
40.86	0.06766
40.88	-4.28524
40.9	-6.72386
40.92	-0.47677
40.94	3.28462
40.96	4.38885
40.98	0.20738
41	7.94019
41.02	7.98728
41.04	4.52009
41.06	-5.06138
41.08	-5.04286
41.1	-0.71005
41.12	4.50848
41.14	1.09843
41.16	-3.05447
41.18	-5.17881
41.2	0.23972
41.22	1.17253
41.24	3.2482
41.26	3.06672
41.28	4.25667
41.3	-0.89623
41.32	-2.93485
41.34	0.02653
41.36	2.67363
41.38	-1.73642
41.4	-0.08932
41.42	6.3292
41.44	5.7763
41.46	-1.03375
41.48	-1.81523
41.5	4.83187
41.52	0.02182
41.54	-2.93108
41.56	-1.94113
41.58	3.33454
41.6	1.15306
41.62	3.4573
41.64	7.5044
41.66	6.40863
41.68	3.65573
41.7	1.67426
41.72	2.80707
41.74	3.62559
41.76	2.98697
41.78	3.0055
41.8	2.59545
41.82	2.04254
41.84	-0.68179
41.86	-0.89184
41.88	5.09812
41.9	5.77378
41.92	2.13542
41.94	-2.78857
41.96	2.25296
41.98	5.51573
42	6.2886
42.02	4.54829
42.04	4.86513
42.06	0.58196
42.08	-0.12977
42.1	1.92992
42.12	5.84676
42.14	4.59217
42.16	5.02329
42.18	10.1401
42.2	10.5712
42.22	5.25952
42.24	-0.5665
42.26	2.72176
42.28	3.95289
42.3	0.2983
42.32	-0.21344
42.34	0.56054
42.36	2.24881
42.38	-1.40578
42.4	0.31105
42.42	-0.62925
42.44	3.9733
42.46	5.71871
42.48	6.92126
42.5	4.98095
42.52	1.32636
42.54	-0.18537
42.56	4.47432
42.58	8.39116
42.6	6.908
42.62	2.25341
42.64	2.79881
42.66	5.40137
42.68	7.28963
42.7	0.12075
42.72	-1.76241
42.74	3.46871
42.76	7.32841
42.78	4.9881
42.8	5.99065
42.82	3.42178
42.84	3.93861
42.86	8.22688
42.88	11.9437
42.9	7.54627
42.92	7.63453
42.94	8.80851
42.96	7.21107
42.98	5.29933
43	10.159
43.02	11.6759
43.04	8.7927
43.06	4.85239
43.08	7.22637
43.1	8.8575
43.12	9.97433
43.14	13.434
43.16	13.608
43.18	14.6106
43.2	14.0417
43.22	16.4442
43.24	16.7325
43.26	18.2779
43.28	23.509
43.3	23.9973
43.32	22.6856
43.34	24.4595
43.36	25.1478
43.38	22.3504
43.4	18.4101
43.42	21.2983
43.44	15.158
43.46	16.7891
43.48	18.1346
43.5	23.68
43.52	21.6539
43.54	23.4279
43.56	19.9733
43.58	17.1187
43.6	16.9213
43.62	17.781
43.64	15.2121
43.66	15.1289
43.68	17.1601
43.7	20.0769
43.72	12.5366
43.74	14.9677
43.76	15.6274
43.78	25.2871
43.8	21.9182
43.82	16.6636
43.84	6.72333
43.86	8.4116
43.88	11.0999
43.9	13.6167
43.92	13.0192
43.94	11.1647
43.96	13.4244
43.98	9.59833
44	7.91517
44.02	9.06058
44.04	9.97742
44.06	8.23711
44.08	6.03966
44.1	2.72793
44.12	2.41619
44.14	8.47589
44.16	9.93558
44.18	5.88099
44.2	6.71211
44.22	7.40038
44.24	8.37436
44.26	4.83405
44.28	2.52232
44.3	3.35344
44.32	9.75599
44.34	6.7014
44.36	5.07538
44.38	2.79222
44.4	2.1662
44.42	-3.65982
44.44	-2.68584
44.46	1.231
44.48	2.46212
44.5	-1.82104
44.52	-3.10421
44.54	-1.01594
44.56	-3.24196
44.58	-4.66798
44.6	-5.094
44.62	0.16569
44.64	-0.20318
44.66	-0.48635
44.68	-4.82665
44.7	-5.88124
44.72	-1.76441
44.74	4.15243
44.76	3.18355
44.78	3.72896
44.8	4.16009
44.82	2.39121
44.84	-3.60624
44.86	-2.11797
44.88	-2.00114
44.9	-3.14144
44.92	-3.93889
44.94	-3.50777
44.96	0.52336
44.98	-0.67409
45	0.52846
45.02	-0.58328
45.04	1.53356
45.06	-0.49246
45.08	3.53867
45.1	2.08415
45.12	2.80072
45.14	1.08826
45.16	4.57548
45.18	4.00563
45.2	2.37865
45.22	-1.30548
45.24	0.06753
45.26	2.1834
45.28	1.52784
45.3	-0.95629
45.32	-1.41185
45.34	-1.2674
45.36	2.44847
45.38	1.56434
45.4	-2.00551
45.42	-6.80392
45.44	-3.68805
45.46	0.62782
45.48	0.11512
45.5	-3.91187
45.52	-6.05314
45.54	-2.1087
45.56	0.29289
45.58	1.35161
45.6	0.78177
45.62	1.75478
45.64	-0.70078
45.66	-3.07062
45.68	-4.21189
45.7	-2.78174
45.72	-4.18015
45.74	-1.32142
45.76	-2.51984
45.78	-2.60397
45.8	-0.91667
45.82	-0.22937
45.84	-1.9135
45.86	-6.19763
45.88	-4.25319
45.9	-2.4516
45.92	2.29284
45.94	1.95157
45.96	3.49601
45.98	1.69759
46	1.24203
46.02	0.30076
46.04	-1.46908
46.06	-3.95321
46.08	-4.55163
46.1	0.07853
46.12	0.85154
46.14	2.96741
46.16	3.19757
46.18	5.88487
46.2	5.1436
46.22	1.63089
46.24	-2.85323
46.26	-3.99451
46.28	0.14993
46.3	3.18009
46.32	4.5531
46.34	2.2404
46.36	2.07056
46.38	-0.75643
46.4	0.15944
46.42	-3.86754
46.44	-5.83739
46.46	-2.97866
46.48	0.36578
46.5	2.65308
46.52	2.14038
46.54	2.19911
46.56	-2.39931
46.58	-4.76915
46.6	-5.65328
46.62	-0.08027
46.64	2.52132
46.66	1.7229
46.68	-4.50409
46.7	0.32607
46.72	2.7848
46.74	2.15781
46.76	-5.15489
46.78	-5.69616
46.8	-4.60886
46.82	-3.37871
46.84	2.02288
46.86	2.51018
46.88	1.9689
46.9	-1.42951
46.92	1.85779
46.94	-0.11206
46.96	1.43239
46.98	1.14826
47	1.14984
47.02	-2.24857
47.04	1.15301
47.06	0.26888
47.08	2.58475
47.1	1.98634
47.12	3.84506
47.14	-0.69621
47.16	-3.89462
47.18	-5.8359
47.2	-2.7486
47.22	-0.11844
47.24	1.65457
47.26	0.22758
47.28	1.11488
47.3	0.63075
47.32	0.03234
47.34	-1.13751
47.36	-0.45021
47.38	-0.56291
47.4	2.78153
47.42	3.32598
47.44	1.67042
47.46	-3.18514
47.48	-4.81213
47.5	-3.1534
47.52	-0.09467
47.54	4.13548
47.56	0.93707
47.58	-1.77563
47.6	-3.00262
47.62	-3.80103
47.64	-3.57088
47.66	-4.42644
47.68	-0.96771
47.7	-1.68041
47.72	-2.02168
47.74	0.15133
47.76	5.18149
47.78	3.01164
47.8	-2.24391
47.82	-4.64233
47.84	0.13068
47.86	1.81798
47.88	1.24814
47.9	-2.46456
47.92	-3.43441
47.94	-0.63282
47.96	0.68305
47.98	-1.02965
48	-2.31378
48.02	0.37352
48.04	2.14653
48.06	2.23383
48.08	2.49256
48.1	-0.62014
48.12	-3.58999
48.14	0.06874
48.16	0.0989
48.18	-2.58523
48.2	-4.66936
48.22	-1.18206
48.24	-0.46619
48.26	1.33539
48.28	2.02269
48.3	1.9957
48.32	-0.37414
48.34	-2.34398
48.36	-3.68526
48.38	-4.36939
48.4	-4.08209
48.42	-1.42336
48.44	1.37822
48.46	-0.36305
48.48	-3.21861
48.5	-3.01702
48.52	-3.64401
48.54	-3.49957
48.56	-4.1837
48.58	-1.92497
48.6	-1.29481
48.62	0.6782
48.64	-2.0345
48.66	0.4528
48.68	-1.2599
48.7	-3.7726
48.72	-5.59959
48.74	-0.76943
48.76	-1.16785
48.78	-0.08055
48.8	1.00675
48.82	1.06548
48.84	-0.81865
48.86	-0.41707
48.88	0.12737
48.9	1.1861
48.92	0.15911
48.94	-4.6393
48.96	-4.80914
48.98	-4.00756
49	-4.14883
49.02	-4.46153
49.04	-1.25995
49.06	0.82735
49.08	-0.42821
49.1	-1.34091
49.12	-1.79647
49.14	-1.90917
49.16	-1.73615
49.18	-3.44886
49.2	-2.04727
49.22	4.0686
49.24	6.32733
49.26	2.92891
49.28	0.27335
49.3	1.67494
49.32	1.79081
49.34	0.90668
49.36	2.79398
49.38	0.99556
49.4	-4.46
49.42	-3.85841
49.44	-2.99968
49.46	0.43047
49.48	-0.1108
49.5	-0.05207
49.52	-2.65049
49.54	-1.07747
49.56	-0.87589
49.58	-4.61716
49.6	-1.90129
49.62	3.10029
49.64	0.81616
49.66	-1.32511
49.68	0.67648
49.7	2.42092
49.72	1.96536
49.74	2.62409
49.76	3.45424
49.78	1.82726
49.8	-1.68544
49.82	-3.25529
49.84	-0.2537
49.86	-0.82355
49.88	-2.85053
49.9	-4.50609
49.92	-0.90451
49.94	-0.36007
49.96	0.44152
49.98	0.0431
[truncated: 1,501 more rows]

## Sheet: TG analysis of Mag@RFSB-Cu
Temperature (℃)	Weight (%)	Derivative Weight (%/min)	Heat Flow Endo Down (mW)
25.62	100.027	0.947	19.9979
25.62	100.032	0.654	19.9962
25.63	100.036	0.581	19.9948
25.63	100.039	0.559	19.9936
25.62	100.043	0.561	19.9926
25.63	100.046	0.567	19.992
25.63	100.05	0.57	19.9915
25.63	100.055	0.566	19.9909
25.62	100.059	0.558	19.9901
25.63	100.065	0.548	19.9907
25.63	100.07	0.537	19.9929
25.64	100.075	0.526	19.9969
25.64	100.08	0.515	20.0059
25.64	100.085	0.504	20.0203
25.64	100.089	0.494	20.0402
25.64	100.093	0.484	20.0659
25.63	100.098	0.474	20.097
25.63	100.102	0.465	20.1327
25.61	100.105	0.457	20.1721
25.63	100.109	0.448	20.2148
25.65	100.113	0.44	20.2597
25.64	100.116	0.432	20.3058
25.64	100.12	0.424	20.3526
25.67	100.123	0.417	20.3999
25.67	100.126	0.409	20.4475
25.69	100.129	0.402	20.4953
25.69	100.132	0.395	20.5295
25.71	100.135	0.388	20.5647
25.73	100.138	0.382	20.601
25.75	100.141	0.376	20.6382
25.77	100.144	0.37	20.6765
25.79	100.147	0.364	20.7158
25.82	100.149	0.358	20.7562
25.84	100.152	0.352	20.7976
25.87	100.155	0.347	20.8399
25.89	100.157	0.342	20.8833
25.93	100.16	0.336	20.9277
25.94	100.162	0.331	20.9732
25.98	100.165	0.326	21.0197
26.02	100.167	0.321	21.0675
26.04	100.17	0.316	21.1165
26.08	100.172	0.311	21.1667
26.11	100.174	0.306	21.2181
26.14	100.176	0.302	21.2706
26.17	100.178	0.297	21.3241
26.22	100.181	0.292	21.3787
26.25	100.183	0.288	21.4344
26.29	100.185	0.283	21.491
26.32	100.187	0.278	21.5486
26.35	100.188	0.274	21.6067
26.38	100.19	0.27	21.6653
26.43	100.192	0.267	21.7245
26.46	100.194	0.265	21.7841
26.5	100.196	0.262	21.8439
26.54	100.197	0.26	21.9039
26.58	100.199	0.257	21.964
26.61	100.201	0.255	22.0242
26.67	100.202	0.252	22.0843
26.69	100.204	0.25	22.1443
26.73	100.206	0.247	22.2043
26.78	100.207	0.244	22.2642
26.8	100.209	0.241	22.324
26.86	100.21	0.238	22.3838
26.89	100.212	0.235	22.4434
26.95	100.214	0.233	22.5029
27	100.215	0.23	22.5624
27.03	100.216	0.227	22.622
27.09	100.218	0.224	22.6818
27.12	100.219	0.221	22.7418
27.19	100.221	0.218	22.8021
27.22	100.222	0.215	22.8626
27.27	100.223	0.212	22.9234
27.31	100.224	0.209	22.9844
27.38	100.226	0.206	23.0459
27.42	100.227	0.203	23.1077
27.48	100.228	0.2	23.1699
27.54	100.229	0.197	23.2324
27.6	100.23	0.194	23.2953
27.64	100.231	0.191	23.3587
27.69	100.232	0.188	23.4224
27.74	100.233	0.185	23.4865
27.81	100.234	0.183	23.5511
27.86	100.235	0.18	23.616
27.92	100.236	0.177	23.6814
27.95	100.237	0.174	23.7472
28.03	100.238	0.171	23.8134
28.08	100.239	0.168	23.88
28.13	100.239	0.165	23.947
28.19	100.24	0.162	24.0144
28.25	100.241	0.159	24.0822
28.32	100.242	0.156	24.1501
28.37	100.242	0.153	24.2184
28.43	100.243	0.15	24.2869
28.5	100.243	0.147	24.3556
28.57	100.244	0.144	24.4246
28.63	100.245	0.141	24.4938
28.7	100.245	0.138	24.5633
28.75	100.245	0.135	24.6329
28.81	100.246	0.132	24.7029
28.86	100.246	0.129	24.7729
28.94	100.247	0.126	24.8432
29	100.248	0.121	24.9135
29.06	100.249	0.117	24.984
29.13	100.25	0.114	25.0545
29.2	100.251	0.11	25.1252
29.26	100.253	0.107	25.196
29.34	100.254	0.104	25.267
29.4	100.255	0.1	25.338
29.47	100.256	0.097	25.4092
29.54	100.257	0.093	25.4806
29.61	100.258	0.089	25.5521
29.68	100.259	0.085	25.6238
29.74	100.26	0.081	25.6957
29.81	100.261	0.077	25.7678
29.88	100.262	0.073	25.8402
29.96	100.263	0.069	25.9127
30.02	100.263	0.066	25.9855
30.09	100.264	0.062	26.0586
30.16	100.265	0.059	26.1318
30.24	100.266	0.055	26.2053
30.31	100.266	0.052	26.279
30.38	100.267	0.049	26.3529
30.47	100.267	0.045	26.427
30.54	100.268	0.042	26.5014
30.6	100.268	0.039	26.5759
30.7	100.269	0.036	26.6506
30.77	100.269	0.033	26.7256
30.83	100.27	0.03	26.8008
30.91	100.27	0.027	26.8762
30.99	100.271	0.024	26.9518
31.06	100.271	0.021	27.0276
31.14	100.271	0.018	27.1035
31.23	100.271	0.015	27.1797
31.31	100.272	0.012	27.256
31.38	100.272	0.00886	27.3325
31.47	100.272	0.00593	27.4092
31.55	100.272	0.00302	27.486
31.62	100.273	0.000111	27.5629
31.7	100.273	-0.00278	27.64
31.77	100.273	-0.00567	27.7173
31.86	100.273	-0.00853	27.7947
31.93	100.273	-0.011	27.8724
32.03	100.273	-0.014	27.9502
32.11	100.273	-0.017	28.0281
32.2	100.273	-0.02	28.1063
32.27	100.273	-0.023	28.1846
32.35	100.273	-0.025	28.2631
32.43	100.273	-0.028	28.3417
32.52	100.273	-0.031	28.4205
32.59	100.273	-0.034	28.4994
32.68	100.272	-0.036	28.5785
32.76	100.272	-0.039	28.6578
32.86	100.272	-0.042	28.7372
32.95	100.272	-0.045	28.8167
33.03	100.272	-0.047	28.8964
33.11	100.271	-0.05	28.9763
33.18	100.271	-0.053	29.0563
33.28	100.271	-0.055	29.1364
33.37	100.27	-0.058	29.2167
33.46	100.27	-0.061	29.2972
33.54	100.269	-0.064	29.3778
33.63	100.269	-0.066	29.4585
33.72	100.268	-0.069	29.5393
33.83	100.268	-0.072	29.6203
33.89	100.267	-0.074	29.7014
33.99	100.267	-0.077	29.7826
34.08	100.266	-0.08	29.864
34.17	100.266	-0.083	29.9456
34.26	100.265	-0.085	30.0273
34.35	100.265	-0.088	30.1091
34.43	100.264	-0.091	30.1911
34.54	100.263	-0.093	30.2732
34.63	100.262	-0.096	30.3554
34.7	100.262	-0.099	30.4378
34.8	100.261	-0.101	30.5204
34.9	100.26	-0.104	30.603
34.98	100.259	-0.107	30.6858
35.07	100.258	-0.109	30.7687
35.17	100.258	-0.112	30.8517
35.26	100.257	-0.115	30.9347
35.36	100.256	-0.117	31.0179
35.46	100.255	-0.12	31.1011
35.55	100.254	-0.123	31.1845
35.65	100.253	-0.125	31.2679
35.73	100.252	-0.128	31.3514
35.81	100.251	-0.13	31.435
35.92	100.25	-0.133	31.5187
36.03	100.249	-0.136	31.6026
36.12	100.247	-0.138	31.6865
36.21	100.246	-0.141	31.7706
36.31	100.245	-0.143	31.8547
36.41	100.244	-0.146	31.9389
36.51	100.243	-0.149	32.0232
36.6	100.242	-0.151	32.1075
36.69	100.24	-0.154	32.192
36.8	100.239	-0.156	32.2764
36.89	100.238	-0.159	32.361
36.99	100.236	-0.161	32.4456
37.08	100.235	-0.164	32.5303
37.18	100.234	-0.166	32.615
37.28	100.232	-0.169	32.6999
37.38	100.231	-0.172	32.7848
37.47	100.229	-0.175	32.8697
37.58	100.228	-0.178	32.9548
37.67	100.226	-0.181	33.0399
37.78	100.225	-0.184	33.125
37.88	100.223	-0.187	33.2103
37.97	100.222	-0.19	33.2956
38.08	100.22	-0.193	33.3809
38.18	100.218	-0.196	33.4663
38.28	100.217	-0.199	33.5517
38.39	100.215	-0.202	33.6372
38.49	100.213	-0.205	33.7228
38.59	100.212	-0.208	33.8084
38.68	100.21	-0.211	33.8941
38.79	100.208	-0.214	33.9798
38.89	100.206	-0.216	34.0656
38.98	100.204	-0.219	34.1515
39.09	100.203	-0.222	34.2374
39.19	100.201	-0.225	34.3234
39.3	100.199	-0.228	34.4094
39.41	100.197	-0.231	34.4955
39.52	100.195	-0.234	34.5817
39.61	100.193	-0.237	34.668
39.71	100.191	-0.239	34.7543
39.81	100.189	-0.242	34.8406
39.92	100.187	-0.245	34.927
40.03	100.185	-0.248	35.0134
40.13	100.183	-0.251	35.0999
40.22	100.18	-0.253	35.1864
40.34	100.178	-0.256	35.273
40.44	100.176	-0.259	35.3596
40.56	100.174	-0.262	35.4463
40.66	100.172	-0.265	35.533
40.75	100.169	-0.267	35.6197
40.87	100.167	-0.27	35.7065
40.98	100.165	-0.273	35.7933
41.08	100.162	-0.276	35.8801
41.18	100.16	-0.278	35.967
41.28	100.158	-0.281	36.054
41.4	100.155	-0.284	36.1409
41.51	100.153	-0.286	36.228
41.61	100.15	-0.289	36.3151
41.71	100.148	-0.292	36.4022
41.83	100.145	-0.295	36.4894
41.92	100.143	-0.297	36.5766
42.04	100.14	-0.3	36.6638
42.16	100.138	-0.303	36.7511
42.26	100.135	-0.305	36.8385
42.37	100.132	-0.308	36.9258
42.47	100.13	-0.311	37.0133
42.58	100.127	-0.313	37.1007
42.71	100.124	-0.316	37.1882
42.81	100.122	-0.318	37.2757
42.9	100.119	-0.321	37.3633
43.01	100.116	-0.324	37.4509
43.13	100.113	-0.326	37.5385
43.25	100.11	-0.329	37.6262
43.35	100.107	-0.331	37.7139
43.44	100.104	-0.334	37.8017
43.57	100.102	-0.337	37.8895
43.68	100.099	-0.339	37.9774
43.79	100.096	-0.342	38.0653
43.91	100.093	-0.344	38.1533
44.02	100.09	-0.347	38.2413
44.12	100.087	-0.349	38.3294
44.23	100.083	-0.352	38.4175
44.36	100.08	-0.354	38.5056
44.47	100.077	-0.357	38.5937
44.57	100.074	-0.359	38.6819
44.7	100.071	-0.362	38.77
44.8	100.068	-0.364	38.8582
44.91	100.064	-0.367	38.9463
45.04	100.061	-0.369	39.0344
45.14	100.058	-0.372	39.1224
45.24	100.055	-0.374	39.2105
45.35	100.051	-0.376	39.2987
45.48	100.048	-0.379	39.3868
45.59	100.045	-0.381	39.4749
45.71	100.041	-0.384	39.563
45.82	100.038	-0.386	39.6511
45.92	100.035	-0.388	39.7392
46.05	100.031	-0.391	39.8274
46.15	100.028	-0.393	39.9155
46.28	100.024	-0.395	40.0036
46.38	100.021	-0.398	40.0917
46.5	100.017	-0.4	40.1798
46.61	100.014	-0.402	40.2679
46.74	100.01	-0.404	40.356
46.85	100.006	-0.407	40.444
46.96	100.003	-0.409	40.532
47.08	99.999	-0.411	40.62
47.19	99.996	-0.413	40.708
47.31	99.992	-0.416	40.796
47.41	99.988	-0.418	40.8839
47.53	99.984	-0.42	40.9719
47.65	99.981	-0.422	41.0598
47.78	99.977	-0.424	41.1478
47.89	99.973	-0.426	41.2358
47.99	99.969	-0.429	41.3238
48.12	99.966	-0.431	41.4118
48.24	99.962	-0.433	41.4998
48.35	99.958	-0.435	41.5878
48.47	99.954	-0.437	41.6758
48.59	99.95	-0.439	41.7638
48.71	99.946	-0.441	41.8518
48.83	99.942	-0.443	41.9398
48.94	99.939	-0.445	42.0278
49.06	99.935	-0.447	42.1158
49.17	99.931	-0.449	42.2037
49.29	99.927	-0.451	42.2916
49.41	99.923	-0.453	42.3794
49.52	99.919	-0.455	42.4672
49.65	99.915	-0.457	42.5549
49.76	99.911	-0.459	42.6427
49.87	99.907	-0.461	42.7304
50	99.902	-0.463	42.8181
50.12	99.898	-0.465	42.9058
50.24	99.894	-0.467	42.9936
50.35	99.89	-0.468	43.0813
50.47	99.886	-0.47	43.169
50.58	99.882	-0.472	43.2568
50.72	99.878	-0.474	43.3446
50.84	99.873	-0.476	43.4324
50.95	99.869	-0.478	43.5201
51.08	99.865	-0.479	43.6079
51.19	99.861	-0.481	43.6956
51.3	99.856	-0.483	43.7833
51.42	99.852	-0.485	43.8708
51.54	99.848	-0.486	43.9584
51.66	99.844	-0.488	44.0459
51.78	99.839	-0.49	44.1333
51.9	99.835	-0.491	44.2207
52.04	99.831	-0.493	44.308
52.16	99.826	-0.495	44.3953
52.27	99.822	-0.496	44.4825
52.38	99.818	-0.498	44.5697
52.51	99.813	-0.499	44.6569
52.63	99.809	-0.501	44.744
52.75	99.804	-0.502	44.831
52.87	99.8	-0.504	44.918
53	99.795	-0.505	45.005
53.12	99.791	-0.507	45.0919
53.23	99.786	-0.508	45.1787
53.35	99.782	-0.51	45.2655
53.48	99.777	-0.511	45.3523
53.61	99.773	-0.513	45.439
53.73	99.768	-0.514	45.5256
53.86	99.764	-0.515	45.6122
53.97	99.759	-0.517	45.6987
54.1	99.755	-0.518	45.7852
54.2	99.75	-0.52	45.8715
54.34	99.745	-0.521	45.9578
54.45	99.741	-0.522	46.0441
54.58	99.736	-0.523	46.1303
54.7	99.731	-0.525	46.2164
54.82	99.727	-0.526	46.3025
54.94	99.722	-0.527	46.3885
55.07	99.717	-0.528	46.4745
55.19	99.713	-0.529	46.5604
55.33	99.708	-0.531	46.6463
55.44	99.703	-0.532	46.7321
55.56	99.699	-0.533	46.818
55.69	99.694	-0.534	46.9037
55.81	99.689	-0.535	46.9894
55.93	99.684	-0.536	47.0751
56.07	99.68	-0.537	47.1607
56.18	99.675	-0.538	47.2462
56.3	99.67	-0.539	47.3316
56.43	99.665	-0.54	47.4168
56.55	99.661	-0.541	47.502
56.66	99.656	-0.542	47.5872
56.8	99.651	-0.543	47.6722
56.92	99.646	-0.544	47.7571
57.05	99.641	-0.545	47.842
57.17	99.637	-0.545	47.9268
57.28	99.632	-0.546	48.0116
57.41	99.627	-0.547	48.0963
57.54	99.622	-0.548	48.181
57.68	99.617	-0.549	48.2657
57.79	99.612	-0.55	48.3503
57.92	99.607	-0.55	48.435
58.04	99.603	-0.551	48.5196
58.17	99.598	-0.552	48.6042
58.3	99.593	-0.552	48.6888
58.43	99.588	-0.553	48.7733
58.55	99.583	-0.554	48.8577
58.68	99.578	-0.554	48.942
58.81	99.573	-0.555	49.0263
58.92	99.568	-0.556	49.1105
59.04	99.563	-0.556	49.1946
59.18	99.558	-0.557	49.2787
59.3	99.553	-0.557	49.3627
59.43	99.549	-0.558	49.4466
59.53	99.544	-0.558	49.5305
59.68	99.539	-0.559	49.6144
59.82	99.534	-0.559	49.6981
59.93	99.529	-0.56	49.7819
60.06	99.524	-0.56	49.8655
60.19	99.519	-0.561	49.9491
60.3	99.514	-0.561	50.0326
60.45	99.509	-0.562	50.116
60.55	99.504	-0.562	50.1994
60.69	99.499	-0.562	50.2828
60.81	99.494	-0.563	50.366
60.95	99.489	-0.563	50.4492
61.06	99.484	-0.563	50.5324
61.2	99.479	-0.564	50.6154
61.33	99.474	-0.564	50.6983
61.44	99.469	-0.564	50.7812
61.57	99.464	-0.564	50.864
61.72	99.459	-0.565	50.9467
61.84	99.454	-0.565	51.0293
61.97	99.449	-0.565	51.1119
62.07	99.444	-0.565	51.1943
62.22	99.439	-0.565	51.2767
62.34	99.435	-0.566	51.3589
62.46	99.43	-0.566	51.441
62.6	99.425	-0.566	51.5231
62.73	99.42	-0.566	51.6051
62.84	99.415	-0.566	51.687
62.99	99.41	-0.566	51.7689
63.12	99.405	-0.566	51.8507
63.24	99.4	-0.566	51.9324
63.36	99.395	-0.566	52.014
63.48	99.39	-0.566	52.0955
63.62	99.385	-0.566	52.177
63.76	99.38	-0.566	52.2583
63.88	99.375	-0.566	52.3397
64.02	99.37	-0.566	52.4209
64.13	99.365	-0.566	52.502
64.28	99.36	-0.566	52.5831
64.4	99.355	-0.566	52.664
64.53	99.35	-0.565	52.7449
64.66	99.345	-0.565	52.8255
64.78	99.34	-0.565	52.9061
64.92	99.335	-0.565	52.9868
65.04	99.33	-0.565	53.0673
65.17	99.325	-0.564	53.1478
65.3	99.32	-0.564	53.2283
65.42	99.315	-0.564	53.3087
65.55	99.31	-0.564	53.389
65.68	99.305	-0.563	53.4692
65.82	99.3	-0.563	53.5494
65.95	99.295	-0.562	53.6295
66.08	99.29	-0.562	53.7095
66.21	99.285	-0.562	53.7894
66.35	99.28	-0.561	53.8692
66.48	99.275	-0.561	53.949
66.61	99.27	-0.56	54.0287
66.71	99.265	-0.56	54.1083
66.85	99.261	-0.559	54.1878
67	99.256	-0.559	54.2672
67.12	99.251	-0.558	54.3466
67.25	99.246	-0.558	54.4258
67.38	99.241	-0.557	54.5049
67.5	99.236	-0.557	54.5839
67.63	99.231	-0.556	54.6629
67.77	99.226	-0.555	54.7417
67.92	99.222	-0.555	54.8205
68.02	99.217	-0.554	54.8992
68.17	99.212	-0.554	54.9777
68.29	99.207	-0.553	55.0562
68.41	99.202	-0.552	55.1346
68.57	99.197	-0.551	55.2129
68.69	99.193	-0.551	55.2911
68.81	99.188	-0.55	55.3692
68.95	99.183	-0.549	55.4474
69.08	99.178	-0.548	55.5254
69.2	99.173	-0.548	55.6034
69.34	99.169	-0.547	55.6813
69.46	99.164	-0.546	55.7592
69.6	99.159	-0.545	55.837
69.74	99.154	-0.544	55.9146
69.87	99.15	-0.544	55.9922
70	99.145	-0.543	56.0697
70.13	99.14	-0.542	56.1471
70.26	99.136	-0.541	56.2244
70.4	99.131	-0.54	56.3017
70.53	99.126	-0.539	56.3789
70.66	99.121	-0.538	56.4559
70.77	99.117	-0.537	56.5328
70.91	99.112	-0.536	56.6096
71.05	99.107	-0.535	56.6863
71.18	99.103	-0.534	56.7629
71.3	99.098	-0.533	56.8394
71.44	99.094	-0.532	56.9159
71.59	99.089	-0.531	56.9922
71.73	99.084	-0.53	57.0685
71.84	99.08	-0.529	57.1447
71.97	99.075	-0.528	57.2208
72.1	99.071	-0.527	57.2968
72.25	99.066	-0.526	57.3727
72.37	99.061	-0.525	57.4486
72.49	99.057	-0.524	57.5244
72.63	99.052	-0.523	57.6002
72.78	99.048	-0.522	57.6759
72.89	99.043	-0.52	57.7515
73.04	99.039	-0.519	57.8271
73.16	99.034	-0.518	57.9027
73.29	99.03	-0.517	57.9781
73.42	99.025	-0.516	58.0536
73.56	99.021	-0.515	58.1289
73.69	99.016	-0.514	58.2042
73.84	99.012	-0.512	58.2794
73.96	99.007	-0.511	58.3546
74.08	99.003	-0.51	58.4297
74.22	98.998	-0.509	58.5047
74.35	98.994	-0.507	58.5797
74.48	98.99	-0.506	58.6545
74.63	98.985	-0.505	58.7294
74.75	98.981	-0.504	58.8041
74.9	98.977	-0.502	58.8788
75.02	98.972	-0.501	58.9534
75.15	98.968	-0.5	59.0279
75.29	98.963	-0.499	59.1023
75.43	98.959	-0.497	59.1767
75.56	98.955	-0.496	59.251
75.68	98.951	-0.495	59.3252
75.83	98.946	-0.493	59.3993
75.95	98.942	-0.492	59.4733
76.08	98.938	-0.491	59.5472
76.22	98.933	-0.489	59.621
76.36	98.929	-0.488	59.6948
76.5	98.925	-0.486	59.7684
76.62	98.921	-0.485	59.8419
76.77	98.917	-0.484	59.9153
76.89	98.912	-0.482	59.9887
77.02	98.908	-0.481	60.0619
77.17	98.904	-0.479	60.1351
77.3	98.9	-0.478	60.2081
77.43	98.896	-0.476	60.2812
77.57	98.892	-0.475	60.3542
77.71	98.888	-0.473	60.4272
77.84	98.884	-0.472	60.5001
77.99	98.88	-0.47	60.573
78.11	98.876	-0.469	60.6459
78.23	98.872	-0.467	60.7187
78.37	98.868	-0.466	60.7916
78.5	98.864	-0.464	60.8644
78.63	98.86	-0.463	60.9371
78.79	98.856	-0.461	61.0097
78.89	98.852	-0.46	61.0823
79.03	98.848	-0.458	61.1548
79.18	98.844	-0.457	61.2272
79.32	98.84	-0.455	61.2995
79.44	98.836	-0.454	61.3718
79.59	98.832	-0.452	61.444
79.72	98.828	-0.451	61.516
79.86	98.825	-0.449	61.588
79.99	98.821	-0.447	61.6599
80.13	98.817	-0.446	61.7317
80.25	98.813	-0.444	61.8034
80.38	98.81	-0.443	61.875
80.52	98.806	-0.441	61.9465
80.66	98.802	-0.44	62.0179
80.79	98.798	-0.438	62.0892
80.93	98.795	-0.436	62.1604
81.07	98.791	-0.435	62.2315
81.2	98.788	-0.433	62.3026
81.35	98.784	-0.432	62.3736
81.48	98.78	-0.43	62.4446
81.61	98.777	-0.428	62.5154
81.76	98.773	-0.427	62.5863
81.89	98.77	-0.425	62.657
82.03	98.766	-0.424	62.7277
82.16	98.763	-0.422	62.7983
82.29	98.759	-0.42	62.8688
82.43	98.756	-0.419	62.9393
82.56	98.752	-0.417	63.0097
82.69	98.749	-0.415	63.08
82.83	98.745	-0.414	63.1502
82.97	98.742	-0.412	63.2204
83.1	98.738	-0.411	63.2905
83.25	98.735	-0.409	63.3605
83.37	98.732	-0.407	63.4305
83.53	98.728	-0.406	63.5003
83.65	98.725	-0.404	63.5701
83.78	98.722	-0.402	63.6398
83.92	98.718	-0.401	63.7094
84.06	98.715	-0.399	63.7789
84.19	98.712	-0.397	63.8483
84.34	98.708	-0.396	63.9176
84.47	98.705	-0.394	63.9868
84.61	98.702	-0.392	64.056
84.74	98.699	-0.391	64.1251
84.87	98.695	-0.389	64.1941
85.03	98.692	-0.387	64.2629
85.16	98.689	-0.386	64.3317
85.27	98.686	-0.384	64.4004
85.41	98.683	-0.382	64.469
85.55	98.68	-0.381	64.5376
85.69	98.676	-0.379	64.6061
85.84	98.673	-0.377	64.6746
85.97	98.67	-0.376	64.743
86.1	98.667	-0.374	64.8114
86.24	98.664	-0.372	64.8797
86.38	98.661	-0.371	64.948
86.52	98.658	-0.369	65.0161
86.67	98.655	-0.367	65.0842
86.79	98.652	-0.366	65.1522
86.94	98.649	-0.364	65.2202
87.06	98.646	-0.362	65.2881
87.2	98.643	-0.361	65.356
87.34	98.64	-0.359	65.4238
87.48	98.637	-0.357	65.4915
87.61	98.634	-0.356	65.5592
87.75	98.631	-0.354	65.6267
87.88	98.628	-0.352	65.6943
88.02	98.625	-0.351	65.7617
88.16	98.622	-0.349	65.8291
88.3	98.62	-0.347	65.8964
88.44	98.617	-0.346	65.9636
88.59	98.614	-0.344	66.0308
88.72	98.611	-0.342	66.0978
88.84	98.608	-0.341	66.1648
88.99	98.605	-0.339	66.2317
89.13	98.603	-0.337	66.2986
89.26	98.6	-0.336	66.3653
89.39	98.597	-0.334	66.432
89.55	98.594	-0.332	66.4987
89.68	98.592	-0.331	66.5652
89.8	98.589	-0.329	66.6317
89.95	98.586	-0.327	66.6981
90.07	98.584	-0.326	66.7644
90.22	98.581	-0.324	66.8306
90.35	98.578	-0.323	66.8968
90.5	98.576	-0.321	66.9629
90.65	98.573	-0.319	67.0289
90.78	98.571	-0.318	67.0949
90.92	98.568	-0.316	67.1607
91.06	98.566	-0.314	67.2265
91.19	98.563	-0.313	67.2923
91.33	98.56	-0.311	67.3579
91.47	98.558	-0.31	67.4235
91.6	98.555	-0.308	67.489
91.75	98.553	-0.307	67.5543
91.88	98.55	-0.305	67.6197
92.03	98.548	-0.303	67.6849
92.17	98.546	-0.302	67.75
92.29	98.543	-0.3	67.815
92.44	98.541	-0.299	67.8799
92.57	98.538	-0.297	67.9448
92.71	98.536	-0.296	68.0095
92.85	98.534	-0.294	68.0741
92.99	98.531	-0.293	68.1387
93.12	98.529	-0.291	68.2032
93.25	98.526	-0.29	68.2676
93.41	98.524	-0.288	68.332
93.54	98.522	-0.287	68.3963
93.67	98.52	-0.285	68.4606
93.82	98.517	-0.284	68.5247
93.97	98.515	-0.283	68.5888
94.1	98.513	-0.281	68.6528
94.24	98.51	-0.28	68.7168
94.38	98.508	-0.278	68.7807
94.52	98.506	-0.277	68.8446
94.65	98.504	-0.276	68.9084
94.79	98.502	-0.274	68.9721
94.93	98.499	-0.273	69.0358
95.07	98.497	-0.271	69.0994
95.21	98.495	-0.27	69.163
95.34	98.493	-0.269	69.2264
95.49	98.491	-0.267	69.2899
95.63	98.489	-0.266	69.3532
95.78	98.487	-0.265	69.4165
95.9	98.484	-0.264	69.4797
96.03	98.482	-0.262	69.5428
96.18	98.48	-0.261	69.6058
96.33	98.478	-0.26	69.6688
96.46	98.476	-0.258	69.7316
96.6	98.474	-0.257	69.7944
96.74	98.472	-0.256	69.8572
96.89	98.47	-0.255	69.9198
97.01	98.468	-0.253	69.9824
97.16	98.466	-0.252	70.045
97.29	98.464	-0.251	70.1075
97.45	98.462	-0.25	70.17
97.59	98.46	-0.248	70.2325
97.71	98.458	-0.247	70.2949
97.86	98.456	-0.246	70.3573
97.99	98.455	-0.245	70.4197
98.13	98.453	-0.244	70.4821
98.27	98.451	-0.243	70.5444
98.42	98.449	-0.241	70.6067
98.56	98.447	-0.24	70.669
98.69	98.445	-0.239	70.7312
98.84	98.443	-0.238	70.7933
98.99	98.441	-0.237	70.8555
99.12	98.44	-0.236	70.9175
99.25	98.438	-0.234	70.9796
99.4	98.436	-0.233	71.0416
99.54	98.434	-0.232	71.1035
99.68	98.432	-0.231	71.1654
99.82	98.431	-0.23	71.2272
99.96	98.429	-0.229	71.2889
100.1	98.427	-0.228	71.3506
100.24	98.425	-0.227	71.4123
100.37	98.424	-0.226	71.4739
100.52	98.422	-0.225	71.5354
100.66	98.42	-0.223	71.5968
100.79	98.419	-0.222	71.6582
100.93	98.417	-0.221	71.7196
101.07	98.415	-0.22	71.7808
101.22	98.414	-0.219	71.842
101.37	98.412	-0.218	71.9031
101.5	98.41	-0.217	71.9641
101.63	98.409	-0.216	72.0251
101.78	98.407	-0.215	72.0861
101.93	98.405	-0.214	72.147
102.06	98.404	-0.213	72.2078
102.2	98.402	-0.212	72.2686
102.35	98.401	-0.211	72.3294
102.48	98.399	-0.21	72.3901
102.63	98.397	-0.209	72.4508
102.77	98.396	-0.208	72.5114
102.91	98.394	-0.207	72.5721
103.04	98.393	-0.206	72.6328
103.18	98.391	-0.206	72.6934
103.34	98.39	-0.205	72.7541
103.47	98.388	-0.204	72.8147
103.62	98.387	-0.203	72.8753
103.75	98.385	-0.202	72.9358
103.9	98.384	-0.201	72.9964
104.03	98.382	-0.2	73.057
104.17	98.381	-0.199	73.1175
104.33	98.379	-0.198	73.178
104.47	98.378	-0.198	73.2384
104.6	98.376	-0.197	73.2988
104.74	98.375	-0.196	73.3592
104.89	98.373	-0.195	73.4195
105.03	98.372	-0.194	73.4798
105.18	98.371	-0.194	73.54
105.31	98.369	-0.193	73.6002
105.46	98.368	-0.192	73.6604
105.6	98.366	-0.191	73.7205
105.74	98.365	-0.19	73.7806
105.87	98.363	-0.19	73.8407
106.02	98.362	-0.189	73.9007
106.15	98.361	-0.188	73.9607
106.3	98.359	-0.187	74.0207
106.44	98.358	-0.187	74.0806
106.58	98.356	-0.186	74.1404
106.71	98.355	-0.185	74.2001
106.88	98.354	-0.184	74.2597
107	98.352	-0.184	74.3193
107.15	98.351	-0.183	74.3788
107.29	98.35	-0.182	74.4383
107.45	98.348	-0.182	74.4978
107.57	98.347	-0.181	74.5571
107.72	98.345	-0.18	74.6165
107.88	98.344	-0.18	74.6758
108	98.343	-0.179	74.7352
108.15	98.341	-0.178	74.7945
108.28	98.34	-0.178	74.8539
108.43	98.339	-0.177	74.9133
108.58	98.337	-0.176	74.9727
108.71	98.336	-0.176	75.0321
108.85	98.334	-0.175	75.0914
108.99	98.333	-0.175	75.1507
109.14	98.332	-0.174	75.21
109.26	98.33	-0.173	75.2693
109.42	98.329	-0.173	75.3285
109.57	98.328	-0.172	75.3877
109.69	98.326	-0.172	75.4468
109.84	98.325	-0.171	75.5059
109.98	98.324	-0.17	75.5649
110.13	98.322	-0.17	75.6238
110.27	98.321	-0.169	75.6827
110.41	98.32	-0.169	75.7415
110.54	98.318	-0.168	75.8002
110.7	98.317	-0.168	75.8589
110.85	98.316	-0.167	75.9175
110.98	98.314	-0.167	75.9762
111.13	98.313	-0.166	76.0348
111.28	98.312	-0.166	76.0934
111.42	98.31	-0.165	76.1519
111.56	98.309	-0.165	76.2105
111.7	98.308	-0.164	76.2691
111.84	98.306	-0.164	76.3276
111.98	98.305	-0.164	76.386
112.14	98.304	-0.163	76.4445
112.27	98.302	-0.163	76.5028
112.41	98.301	-0.162	76.5612
112.56	98.3	-0.162	76.6195
112.69	98.299	-0.161	76.6778
112.83	98.297	-0.161	76.736
112.98	98.296	-0.161	76.7942
113.13	98.295	-0.16	76.8523
113.28	98.293	-0.16	76.9104
113.44	98.292	-0.159	76.9685
113.56	98.291	-0.159	77.0266
113.7	98.29	-0.159	77.0847
113.85	98.288	-0.158	77.1428
113.98	98.287	-0.158	77.201
114.13	98.286	-0.158	77.2592
114.27	98.285	-0.157	77.3173
114.42	98.283	-0.157	77.3755
114.57	98.282	-0.157	77.4337
114.71	98.281	-0.156	77.4918
114.85	98.28	-0.156	77.5499
114.99	98.278	-0.156	77.6079
115.14	98.277	-0.155	77.6658
115.29	98.276	-0.155	77.7236
115.42	98.275	-0.155	77.7813
115.56	98.273	-0.155	77.839
115.71	98.272	-0.154	77.8967
115.84	98.271	-0.154	77.9543
116	98.27	-0.154	78.0118
116.14	98.269	-0.154	78.0694
116.29	98.267	-0.153	78.127
116.44	98.266	-0.153	78.1845
116.57	98.265	-0.153	78.242
116.72	98.264	-0.153	78.2995
116.86	98.262	-0.152	78.357
117.01	98.261	-0.152	78.4145
117.16	98.26	-0.152	78.472
117.29	98.259	-0.152	78.5295
117.44	98.258	-0.152	78.5871
117.6	98.256	-0.152	78.6446
117.72	98.255	-0.151	78.7021
117.87	98.254	-0.151	78.7597
118.02	98.253	-0.151	78.8172
118.17	98.252	-0.151	78.8747
118.29	98.25	-0.151	78.9322
118.44	98.249	-0.151	78.9897
118.59	98.248	-0.15	79.0472
118.74	98.247	-0.15	79.1046
118.88	98.246	-0.15	79.162
119.01	98.244	-0.15	79.2193
119.18	98.243	-0.15	79.2767
119.32	98.242	-0.15	79.334
119.47	98.241	-0.15	79.3913
119.6	98.24	-0.149	79.4486
119.75	98.238	-0.149	79.5058
119.9	98.237	-0.149	79.563
120.03	98.236	-0.149	79.6202
120.19	98.235	-0.149	79.6773
120.32	98.234	-0.149	79.7345
120.46	98.232	-0.149	79.7916
120.62	98.231	-0.149	79.8486
120.77	98.23	-0.149	79.9057
120.89	98.229	-0.149	79.9626
121.05	98.228	-0.148	80.0195
121.19	98.226	-0.148	80.0763
121.34	98.225	-0.148	80.1331
121.48	98.224	-0.148	80.1898
121.63	98.223	-0.148	80.2465
121.77	98.222	-0.148	80.3031
121.92	98.221	-0.148	80.3597
122.06	98.219	-0.148	80.4162
122.21	98.218	-0.148	80.4727
122.35	98.217	-0.148	80.5292
122.49	98.216	-0.148	80.5857
122.65	98.215	-0.147	80.6422
122.79	98.213	-0.147	80.6986
122.92	98.212	-0.147	80.755
123.09	98.211	-0.147	80.8114
123.23	98.21	-0.147	80.8677
123.38	98.209	-0.147	80.924
123.53	98.208	-0.147	80.9803
123.66	98.206	-0.147	81.0365
123.81	98.205	-0.147	81.0927
123.96	98.204	-0.147	81.1488
124.09	98.203	-0.147	81.2049
124.24	98.202	-0.147	81.261
124.4	98.201	-0.147	81.317
124.53	98.199	-0.146	81.3731
124.68	98.198	-0.146	81.4291
124.83	98.197	-0.146	81.485
124.97	98.196	-0.146	81.5408
125.12	98.195	-0.146	81.5966
125.26	98.194	-0.146	81.6523
125.42	98.192	-0.146	81.708
125.56	98.191	-0.146	81.7636
125.7	98.19	-0.146	81.8191
125.86	98.189	-0.146	81.8745
125.99	98.188	-0.146	81.9299
126.16	98.186	-0.146	81.9853
126.28	98.185	-0.146	82.0406
126.44	98.184	-0.146	82.0959
126.57	98.183	-0.146	82.1511
126.73	98.182	-0.146	82.2063
126.87	98.181	-0.145	82.2614
127.02	98.179	-0.145	82.3165
127.18	98.178	-0.145	82.3716
127.32	98.177	-0.145	82.4266
127.45	98.176	-0.145	82.4817
127.62	98.175	-0.145	82.5367
127.76	98.173	-0.145	82.5916
127.9	98.172	-0.145	82.6465
128.05	98.171	-0.145	82.7014
128.19	98.17	-0.145	82.7562
128.34	98.169	-0.145	82.811
128.49	98.168	-0.145	82.8657
128.63	98.166	-0.145	82.9204
128.78	98.165	-0.145	82.9752
128.93	98.164	-0.145	83.0299
129.07	98.163	-0.145	83.0845
129.22	98.162	-0.145	83.1392
129.35	98.16	-0.145	83.1938
129.52	98.159	-0.145	83.2484
129.67	98.158	-0.145	83.3029
129.8	98.157	-0.145	83.3575
129.95	98.156	-0.145	83.412
130.1	98.154	-0.145	83.4665
130.25	98.153	-0.145	83.5209
130.41	98.152	-0.145	83.5753
130.54	98.151	-0.145	83.6297
130.69	98.15	-0.145	83.684
130.84	98.148	-0.145	83.7382
130.99	98.147	-0.145	83.7923
131.13	98.146	-0.145	83.8464
131.29	98.145	-0.145	83.9004
131.43	98.143	-0.145	83.9544
131.59	98.142	-0.145	84.0083
131.72	98.141	-0.145	84.0622
131.87	98.14	-0.145	84.116
132.02	98.139	-0.145	84.1697
132.16	98.137	-0.145	84.2234
132.31	98.136	-0.145	84.2771
132.46	98.135	-0.145	84.3308
132.62	98.134	-0.145	84.3844
132.75	98.132	-0.145	84.4381
132.91	98.131	-0.145	84.4917
133.05	98.13	-0.145	84.5454
133.2	98.129	-0.145	84.599
133.34	98.127	-0.145	84.6527
133.49	98.126	-0.145	84.7063
133.64	98.125	-0.145	84.76
133.79	98.124	-0.145	84.8136
133.93	98.123	-0.145	84.8673
134.09	98.121	-0.145	84.921
134.24	98.12	-0.145	84.9748
134.4	98.119	-0.145	85.0285
134.52	98.118	-0.145	85.0823
134.68	98.116	-0.145	85.1361
134.82	98.115	-0.145	85.1899
134.97	98.114	-0.145	85.2437
135.12	98.113	-0.145	85.2975
135.27	98.111	-0.145	85.3513
135.42	98.11	-0.145	85.4052
135.57	98.109	-0.145	85.4591
135.71	98.108	-0.145	85.513
135.87	98.106	-0.145	85.5669
136	98.105	-0.145	85.6208
136.16	98.104	-0.145	85.6747
136.31	98.103	-0.145	85.7286
136.45	98.102	-0.146	85.7824
136.6	98.1	-0.146	85.8362
136.75	98.099	-0.146	85.89
136.9	98.098	-0.146	85.9438
137.05	98.097	-0.146	85.9976
137.2	98.095	-0.146	86.0514
137.35	98.094	-0.146	86.1051
137.5	98.093	-0.146	86.1588
137.64	98.092	-0.146	86.2124
137.79	98.09	-0.146	86.2661
137.95	98.089	-0.146	86.3197
138.09	98.088	-0.146	86.3733
138.24	98.087	-0.146	86.4268
138.38	98.086	-0.146	86.4803
138.54	98.084	-0.146	86.5338
138.68	98.083	-0.146	86.5873
138.83	98.082	-0.146	86.6406
138.98	98.081	-0.146	86.694
139.14	98.079	-0.146	86.7473
139.28	98.078	-0.146	86.8005
139.42	98.077	-0.146	86.8537
139.58	98.076	-0.146	86.9069
139.72	98.075	-0.147	86.9599
139.88	98.073	-0.147	87.0129
140.02	98.072	-0.147	87.0659
140.17	98.071	-0.147	87.1188
140.33	98.07	-0.147	87.1716
140.47	98.068	-0.147	87.2244
140.62	98.067	-0.147	87.2771
140.78	98.066	-0.147	87.3298
140.91	98.065	-0.147	87.3823
141.07	98.064	-0.147	87.4349
141.23	98.062	-0.147	87.4873
141.37	98.061	-0.147	87.5397
141.52	98.06	-0.147	87.5921
141.68	98.059	-0.147	87.6444
141.82	98.057	-0.147	87.6966
141.97	98.056	-0.147	87.7488
142.12	98.055	-0.147	87.8009
142.26	98.054	-0.147	87.8529
142.41	98.053	-0.147	87.9048
142.57	98.051	-0.147	87.9568
142.71	98.05	-0.147	88.0086
142.87	98.049	-0.148	88.0604
143.01	98.048	-0.148	88.112
143.16	98.047	-0.148	88.1636
143.31	98.045	-0.148	88.2152
143.45	98.044	-0.148	88.2666
143.61	98.043	-0.148	88.3179
143.76	98.042	-0.148	88.369
143.91	98.04	-0.148	88.4201
144.07	98.039	-0.148	88.4711
144.21	98.038	-0.148	88.522
144.37	98.037	-0.148	88.5728
144.5	98.036	-0.148	88.6235
144.66	98.034	-0.148	88.6741
144.83	98.033	-0.148	88.7247
144.96	98.032	-0.148	88.7751
145.1	98.031	-0.148	88.8255
145.26	98.029	-0.148	88.8759
145.41	98.028	-0.148	88.9261
145.57	98.027	-0.148	88.9764
145.72	98.026	-0.148	89.0266
145.85	98.025	-0.149	89.0767
146	98.023	-0.149	89.1268
146.16	98.022	-0.149	89.1769
146.33	98.021	-0.149	89.227
146.47	98.02	-0.149	89.277
146.62	98.018	-0.149	89.3271
146.76	98.017	-0.149	89.3771
146.92	98.016	-0.149	89.4271
147.07	98.015	-0.149	89.4771
147.21	98.014	-0.149	89.5271
147.37	98.012	-0.149	89.5771
147.52	98.011	-0.149	89.6272
147.69	98.01	-0.149	89.6772
147.83	98.009	-0.149	89.7272
147.97	98.007	-0.149	89.7772
148.13	98.006	-0.149	89.8271
148.27	98.005	-0.149	89.8771
148.42	98.004	-0.15	89.927
148.58	98.003	-0.15	89.9769
148.72	98.001	-0.15	90.0268
148.88	98	-0.15	90.0766
149.03	97.999	-0.15	90.1263
149.19	97.998	-0.15	90.176
149.33	97.996	-0.15	90.2256
149.49	97.995	-0.15	90.2752
149.63	97.994	-0.15	90.3247
149.79	97.993	-0.15	90.3741
149.94	97.992	-0.15	90.4235
150.09	97.99	-0.15	90.4728
150.24	97.989	-0.15	90.5221
150.39	97.988	-0.151	90.5713
150.54	97.987	-0.151	90.6204
150.69	97.985	-0.151	90.6695
150.85	97.984	-0.151	90.7186
150.99	97.983	-0.151	90.7676
151.14	97.982	-0.151	90.8166
151.29	97.98	-0.151	90.8656
151.45	97.979	-0.151	90.9146
151.59	97.978	-0.151	90.9637
151.74	97.977	-0.151	91.0128
151.89	97.975	-0.152	91.0619
152.05	97.974	-0.152	91.111
152.2	97.973	-0.152	91.1602
152.36	97.972	-0.152	91.2094
152.51	97.97	-0.152	91.2587
152.66	97.969	-0.152	91.3079
152.8	97.968	-0.152	91.3572
152.95	97.967	-0.152	91.4064
153.11	97.965	-0.153	91.4557
153.27	97.964	-0.153	91.5049
153.42	97.963	-0.153	91.5541
153.56	97.962	-0.153	91.6033
153.71	97.96	-0.153	91.6525
153.87	97.959	-0.153	91.7016
154.01	97.958	-0.153	91.7507
154.18	97.957	-0.154	91.7997
154.34	97.955	-0.154	91.8488
154.48	97.954	-0.154	91.8978
154.63	97.953	-0.154	91.9468
154.78	97.952	-0.154	91.9957
154.93	97.95	-0.154	92.0447
155.08	97.949	-0.155	92.0936
155.24	97.948	-0.155	92.1425
155.4	97.947	-0.155	92.1913
155.54	97.945	-0.155	92.2402
155.69	97.944	-0.155	92.289
155.84	97.943	-0.155	92.3379
156	97.942	-0.156	92.3867
156.15	97.94	-0.156	92.4354
156.3	97.939	-0.156	92.4841
156.46	97.938	-0.156	92.5328
156.6	97.937	-0.156	92.5815
156.77	97.935	-0.157	92.6301
156.91	97.934	-0.157	92.6787
157.06	97.933	-0.157	92.7273
157.21	97.932	-0.157	92.7758
157.36	97.93	-0.157	92.8243
157.53	97.929	-0.158	92.8727
157.67	97.928	-0.158	92.9211
157.82	97.927	-0.158	92.9694
157.97	97.925	-0.158	93.0177
158.13	97.924	-0.159	93.0659
158.28	97.923	-0.159	93.114
158.42	97.921	-0.159	93.1621
158.58	97.92	-0.159	93.2102
158.74	97.919	-0.16	93.2583
158.89	97.918	-0.16	93.3063
159.05	97.916	-0.16	93.3542
159.21	97.915	-0.16	93.4022
159.35	97.914	-0.161	93.4501
159.5	97.912	-0.161	93.4979
159.66	97.911	-0.161	93.5458
159.82	97.91	-0.161	93.5936
159.96	97.909	-0.162	93.6413
160.12	97.907	-0.162	93.689
160.26	97.906	-0.162	93.7366
160.41	97.905	-0.162	93.7843
160.57	97.903	-0.163	93.8319
160.72	97.902	-0.163	93.8794
160.88	97.901	-0.163	93.927
161.02	97.9	-0.164	93.9744
161.18	97.898	-0.164	94.0219
161.33	97.897	-0.164	94.0694
161.48	97.896	-0.164	94.1169
161.63	97.894	-0.165	94.1643
161.79	97.893	-0.165	94.2118
161.94	97.892	-0.165	94.2592
162.11	97.89	-0.166	94.3067
162.25	97.889	-0.166	94.3541
162.41	97.888	-0.166	94.4016
162.56	97.886	-0.167	94.4491
162.72	97.885	-0.167	94.4965
162.86	97.884	-0.167	94.5441
163.02	97.882	-0.168	94.5916
163.18	97.881	-0.168	94.6392
163.32	97.88	-0.168	94.6867
163.47	97.878	-0.169	94.7342
163.63	97.877	-0.169	94.7817
163.78	97.876	-0.17	94.8291
163.93	97.874	-0.17	94.8766
164.08	97.873	-0.17	94.9239
164.24	97.872	-0.171	94.9713
164.4	97.87	-0.171	95.0186
164.55	97.869	-0.172	95.0659
164.7	97.868	-0.172	95.1131
164.85	97.866	-0.172	95.1604
165.02	97.865	-0.173	95.2075
165.17	97.863	-0.173	95.2548
165.32	97.862	-0.174	95.3019
165.47	97.861	-0.174	95.3491
165.62	97.859	-0.174	95.3963
165.77	97.858	-0.175	95.4435
165.92	97.857	-0.175	95.4907
166.09	97.855	-0.176	95.5378
166.24	97.854	-0.176	95.585
166.39	97.852	-0.177	95.6321
166.54	97.851	-0.177	95.6793
166.71	97.85	-0.178	95.7264
166.86	97.848	-0.178	95.7736
167.02	97.847	-0.178	95.8207
167.15	97.845	-0.179	95.8678
167.32	97.844	-0.179	95.915
167.48	97.842	-0.18	95.9622
167.62	97.841	-0.18	96.0093
167.79	97.84	-0.181	96.0565
167.92	97.838	-0.181	96.1036
168.09	97.837	-0.182	96.1508
168.25	97.835	-0.182	96.1979
168.4	97.834	-0.183	96.245
168.54	97.832	-0.183	96.2921
168.7	97.831	-0.184	96.3392
168.84	97.829	-0.184	96.3863
169.02	97.828	-0.185	96.4333
169.16	97.827	-0.185	96.4803
169.32	97.825	-0.186	96.5273
169.48	97.824	-0.187	96.5742
169.64	97.822	-0.187	96.621
169.79	97.821	-0.188	96.6678
169.94	97.819	-0.188	96.7146
170.09	97.818	-0.189	96.7612
170.23	97.816	-0.189	96.8078
170.41	97.815	-0.19	96.8543
170.55	97.813	-0.191	96.9008
170.7	97.812	-0.191	96.9471
170.87	97.81	-0.192	96.9933
171.01	97.809	-0.192	97.0394
171.17	97.807	-0.193	97.0856
171.33	97.806	-0.193	97.1316
171.49	97.804	-0.194	97.1777
171.63	97.803	-0.195	97.2237
171.8	97.801	-0.195	97.2697
171.95	97.799	-0.196	97.3157
172.09	97.798	-0.197	97.3617
172.26	97.796	-0.197	97.4077
172.42	97.795	-0.198	97.4537
172.56	97.793	-0.198	97.4998
172.73	97.792	-0.199	97.5458
172.87	97.79	-0.2	97.5918
173.03	97.788	-0.2	97.6379
173.19	97.787	-0.201	97.6839
173.35	97.785	-0.202	97.73
173.49	97.784	-0.202	97.7761
173.66	97.782	-0.203	97.8222
173.81	97.78	-0.204	97.8683
173.96	97.779	-0.204	97.9144
174.12	97.777	-0.205	97.9605
174.27	97.775	-0.206	98.0066
174.42	97.774	-0.206	98.0526
174.59	97.772	-0.207	98.0987
174.74	97.771	-0.208	98.1447
174.88	97.769	-0.209	98.1906
175.04	97.767	-0.209	98.2365
175.2	97.766	-0.21	98.2824
175.36	97.764	-0.211	98.3282
175.5	97.762	-0.211	98.374
175.68	97.761	-0.212	98.4197
175.82	97.759	-0.213	98.4653
175.97	97.757	-0.214	98.511
176.12	97.755	-0.214	98.5566
176.29	97.754	-0.215	98.6022
176.44	97.752	-0.216	98.6478
176.59	97.75	-0.216	98.6934
176.75	97.749	-0.217	98.739
176.9	97.747	-0.218	98.7846
177.06	97.745	-0.219	98.8302
177.22	97.743	-0.219	98.8758
177.38	97.742	-0.22	98.9214
177.54	97.74	-0.221	98.9671
177.69	97.738	-0.222	99.0128
177.84	97.736	-0.223	99.0585
178	97.735	-0.223	99.1043
178.15	97.733	-0.224	99.1501
178.32	97.731	-0.225	99.1959
178.46	97.729	-0.226	99.2417
178.61	97.727	-0.226	99.2876
178.77	97.726	-0.227	99.3335
178.93	97.724	-0.228	99.3793
179.08	97.722	-0.229	99.4252
179.25	97.72	-0.23	99.471
179.4	97.718	-0.23	99.5168
179.55	97.716	-0.231	99.5626
179.71	97.714	-0.232	99.6084
179.86	97.713	-0.233	99.6541
180.03	97.711	-0.234	99.6997
180.18	97.709	-0.234	99.7453
180.34	97.707	-0.235	99.7908
180.49	97.705	-0.236	99.8361
180.65	97.703	-0.237	99.8814
180.81	97.701	-0.238	99.9266
180.96	97.699	-0.239	99.9718
181.12	97.697	-0.239	100.017
181.27	97.695	-0.24	100.062
181.43	97.693	-0.241	100.107
181.58	97.691	-0.242	100.152
181.73	97.689	-0.243	100.197
181.89	97.687	-0.244	100.241
182.05	97.685	-0.245	100.286
182.2	97.683	-0.245	100.331
182.37	97.681	-0.246	100.376
182.52	97.679	-0.247	100.421
182.69	97.677	-0.248	100.466
182.83	97.675	-0.249	100.511
182.99	97.673	-0.25	100.555
183.15	97.671	-0.251	100.6
183.3	97.669	-0.251	100.645
183.46	97.667	-0.252	100.691
183.61	97.665	-0.253	100.736
183.78	97.663	-0.254	100.781
183.92	97.661	-0.255	100.826
184.09	97.659	-0.256	100.871
184.24	97.657	-0.257	100.916
184.39	97.655	-0.258	100.962
184.55	97.652	-0.259	101.007
184.72	97.65	-0.26	101.052
184.87	97.648	-0.26	101.097
185.03	97.646	-0.261	101.142
185.18	97.644	-0.262	101.187
185.33	97.642	-0.263	101.232
185.49	97.639	-0.264	101.277
185.65	97.637	-0.265	101.322
185.81	97.635	-0.266	101.367
185.97	97.633	-0.267	101.412
186.12	97.631	-0.268	101.457
186.29	97.628	-0.269	101.501
186.44	97.626	-0.27	101.546
186.6	97.624	-0.271	101.591
186.75	97.622	-0.272	101.635
186.91	97.619	-0.273	101.68
187.07	97.617	-0.274	101.724
187.22	97.615	-0.274	101.769
187.38	97.613	-0.275	101.813
187.54	97.61	-0.276	101.857
187.69	97.608	-0.277	101.901
187.86	97.606	-0.278	101.946
188.01	97.603	-0.279	101.99
188.16	97.601	-0.28	102.034
188.33	97.599	-0.281	102.078
188.48	97.596	-0.282	102.123
188.63	97.594	-0.283	102.167
188.78	97.592	-0.284	102.211
188.95	97.589	-0.285	102.256
189.11	97.587	-0.286	102.3
189.26	97.584	-0.287	102.344
189.42	97.582	-0.288	102.389
189.58	97.58	-0.289	102.433
189.74	97.577	-0.29	102.478
189.89	97.575	-0.291	102.522
190.06	97.572	-0.292	102.567
190.22	97.57	-0.293	102.612
190.37	97.568	-0.294	102.656
190.53	97.565	-0.295	102.701
190.68	97.563	-0.296	102.745
190.84	97.56	-0.297	102.789
190.99	97.558	-0.298	102.834
191.15	97.555	-0.299	102.878
191.3	97.553	-0.3	102.922
191.47	97.55	-0.301	102.966
191.63	97.548	-0.302	103.01
191.79	97.545	-0.303	103.055
191.95	97.543	-0.304	103.099
192.1	97.54	-0.305	103.142
192.26	97.538	-0.306	103.186
192.42	97.535	-0.307	103.23
192.58	97.532	-0.308	103.274
192.73	97.53	-0.309	103.318
192.89	97.527	-0.31	103.362
193.04	97.525	-0.311	103.405
193.21	97.522	-0.312	103.449
193.37	97.52	-0.313	103.493
193.51	97.517	-0.314	103.537
193.68	97.514	-0.315	103.58
193.83	97.512	-0.316	103.624
193.99	97.509	-0.317	103.668
194.15	97.506	-0.318	103.711
194.32	97.504	-0.319	103.755
194.47	97.501	-0.32	103.799
194.63	97.499	-0.321	103.843
194.79	97.496	-0.322	103.886
194.93	97.493	-0.324	103.93
195.09	97.49	-0.325	103.974
195.26	97.488	-0.326	104.018
195.41	97.485	-0.327	104.062
195.57	97.482	-0.328	104.106
195.73	97.48	-0.329	104.15
195.89	97.477	-0.33	104.194
196.05	97.474	-0.331	104.238
196.22	97.471	-0.332	104.282
196.36	97.469	-0.333	104.327
196.5	97.466	-0.334	104.371
196.68	97.463	-0.335	104.415
196.85	97.46	-0.336	104.459
197	97.458	-0.337	104.504
197.14	97.455	-0.338	104.548
197.31	97.452	-0.339	104.592
197.48	97.449	-0.34	104.636
197.63	97.446	-0.341	104.68
197.79	97.444	-0.342	104.724
197.94	97.441	-0.343	104.768
198.11	97.438	-0.344	104.812
198.26	97.435	-0.345	104.856
198.42	97.432	-0.346	104.9
198.58	97.429	-0.347	104.944
198.74	97.426	-0.348	104.988
198.9	97.423	-0.349	105.031
199.06	97.421	-0.35	105.075
199.21	97.418	-0.351	105.119
199.37	97.415	-0.352	105.163
199.53	97.412	-0.353	105.206
199.69	97.409	-0.354	105.25
199.85	97.406	-0.355	105.294
200.01	97.403	-0.356	105.338
200.16	97.4	-0.357	105.381
200.32	97.397	-0.358	105.425
200.49	97.394	-0.359	105.469
200.65	97.391	-0.36	105.512
200.81	97.388	-0.361	105.556
200.95	97.385	-0.362	105.6
201.12	97.382	-0.363	105.644
201.28	97.379	-0.365	105.687
201.44	97.376	-0.366	105.731
201.59	97.373	-0.367	105.775
201.75	97.37	-0.368	105.818
201.91	97.367	-0.369	105.862
202.08	97.364	-0.37	105.905
202.23	97.361	-0.371	105.949
202.4	97.358	-0.372	105.992
202.55	97.354	-0.373	106.036
202.69	97.351	-0.374	106.079
202.87	97.348	-0.375	106.123
203.03	97.345	-0.376	106.166
203.19	97.342	-0.377	106.209
203.36	97.339	-0.378	106.252
203.51	97.336	-0.379	106.296
203.66	97.332	-0.38	106.339
203.83	97.329	-0.381	106.382
203.99	97.326	-0.382	106.426
204.14	97.323	-0.383	106.469
204.29	97.32	-0.384	106.513
204.47	97.317	-0.385	106.556
204.62	97.313	-0.386	106.599
204.79	97.31	-0.387	106.643
204.94	97.307	-0.388	106.686
205.1	97.304	-0.389	106.73
205.26	97.3	-0.39	106.773
205.42	97.297	-0.391	106.817
205.57	97.294	-0.392	106.861
205.73	97.291	-0.393	106.904
205.89	97.287	-0.394	106.948
206.05	97.284	-0.395	106.991
206.21	97.281	-0.397	107.035
206.37	97.277	-0.398	107.079
206.54	97.274	-0.399	107.122
206.69	97.271	-0.4	107.166
206.86	97.267	-0.401	107.21
207.01	97.264	-0.402	107.254
207.17	97.261	-0.403	107.298
207.33	97.257	-0.404	107.341
207.48	97.254	-0.405	107.385
207.65	97.251	-0.406	107.429
207.81	97.247	-0.407	107.473
207.97	97.244	-0.408	107.517
208.13	97.24	-0.409	107.56
208.3	97.237	-0.411	107.604
208.44	97.234	-0.412	107.648
208.6	97.23	-0.413	107.692
208.77	97.227	-0.414	107.736
208.92	97.223	-0.415	107.779
209.08	97.22	-0.416	107.823
209.25	97.216	-0.417	107.867
209.41	97.213	-0.418	107.91
209.56	97.209	-0.419	107.954
209.72	97.206	-0.421	107.998
209.88	97.202	-0.422	108.041
210.04	97.199	-0.423	108.085
210.2	97.195	-0.424	108.129
210.35	97.192	-0.425	108.172
210.53	97.188	-0.426	108.216
210.67	97.184	-0.427	108.26
210.85	97.181	-0.429	108.303
211	97.177	-0.43	108.347
211.17	97.174	-0.431	108.391
211.31	97.17	-0.432	108.434
211.49	97.166	-0.433	108.478
211.65	97.163	-0.434	108.521
211.8	97.159	-0.435	108.565
211.97	97.156	-0.437	108.608
212.12	97.152	-0.438	108.651
212.29	97.148	-0.439	108.695
212.44	97.145	-0.44	108.738
212.6	97.141	-0.441	108.781
212.77	97.137	-0.443	108.824
212.93	97.134	-0.444	108.867
213.07	97.13	-0.445	108.91
213.26	97.126	-0.446	108.953
213.41	97.123	-0.447	108.996
213.57	97.119	-0.449	109.039
213.72	97.115	-0.45	109.082
213.89	97.112	-0.451	109.126
214.05	97.108	-0.452	109.168
214.21	97.104	-0.453	109.212
214.37	97.1	-0.455	109.255
214.53	97.097	-0.456	109.298
214.7	97.093	-0.457	109.341
214.85	97.089	-0.458	109.384
215.02	97.085	-0.46	109.427
215.17	97.082	-0.461	109.47
215.33	97.078	-0.462	109.513
215.5	97.074	-0.463	109.556
215.65	97.07	-0.464	109.599
215.83	97.066	-0.466	109.642
215.98	97.063	-0.467	109.685
216.13	97.059	-0.468	109.728
216.3	97.055	-0.469	109.771
216.47	97.051	-0.471	109.814
216.63	97.047	-0.472	109.856
216.79	97.044	-0.473	109.899
216.94	97.04	-0.475	109.942
217.11	97.036	-0.476	109.984
217.28	97.032	-0.477	110.027
217.42	97.028	-0.478	110.07
217.58	97.024	-0.48	110.112
217.74	97.02	-0.481	110.155
217.91	97.016	-0.482	110.198
218.07	97.012	-0.483	110.24
218.24	97.008	-0.485	110.283
218.39	97.005	-0.486	110.326
218.56	97.001	-0.487	110.369
218.72	96.997	-0.489	110.412
218.87	96.993	-0.49	110.455
219.04	96.989	-0.491	110.498
219.19	96.985	-0.493	110.541
219.37	96.981	-0.494	110.584
219.53	96.977	-0.495	110.627
219.68	96.973	-0.496	110.671
219.84	96.969	-0.498	110.714
220	96.965	-0.499	110.757
220.16	96.96	-0.5	110.8
220.32	96.956	-0.502	110.844
220.48	96.952	-0.503	110.887
220.66	96.948	-0.504	110.93
220.82	96.944	-0.506	110.973
220.98	96.94	-0.507	111.016
221.13	96.936	-0.509	111.059
221.3	96.932	-0.51	111.102
221.46	96.928	-0.511	111.145
221.63	96.923	-0.513	111.188
221.79	96.919	-0.514	111.23
221.95	96.915	-0.515	111.273
222.11	96.911	-0.517	111.316
222.27	96.907	-0.518	111.359
222.42	96.902	-0.52	111.401
222.59	96.898	-0.521	111.444
222.74	96.894	-0.522	111.487
222.91	96.89	-0.524	111.529
223.07	96.885	-0.525	111.572
223.24	96.881	-0.527	111.615
223.41	96.877	-0.528	111.657
223.56	96.873	-0.529	111.699
223.72	96.868	-0.531	111.742
223.89	96.864	-0.532	111.784
224.05	96.86	-0.534	111.827
224.21	96.855	-0.535	111.869
224.36	96.851	-0.536	111.912
224.54	96.846	-0.538	111.954
224.7	96.842	-0.539	111.996
224.86	96.838	-0.541	112.039
225.02	96.833	-0.542	112.081
225.18	96.829	-0.544	112.124
225.34	96.824	-0.545	112.167
225.51	96.82	-0.547	112.209
225.67	96.815	-0.548	112.252
225.83	96.811	-0.549	112.295
226	96.806	-0.551	112.338
226.15	96.802	-0.552	112.38
226.32	96.797	-0.554	112.423
226.49	96.793	-0.555	112.466
226.64	96.788	-0.557	112.508
226.8	96.784	-0.558	112.551
226.98	96.779	-0.56	112.593
227.13	96.774	-0.561	112.635
227.28	96.77	-0.563	112.678
227.46	96.765	-0.564	112.72
227.61	96.761	-0.566	112.763
227.79	96.756	-0.567	112.805
227.93	96.751	-0.569	112.848
228.1	96.747	-0.57	112.89
228.26	96.742	-0.572	112.933
228.43	96.737	-0.573	112.975
228.59	96.732	-0.575	113.018
228.76	96.728	-0.577	113.061
228.92	96.723	-0.578	113.104
229.07	96.718	-0.58	113.147
229.24	96.713	-0.581	113.19
229.4	96.709	-0.583	113.233
229.57	96.704	-0.585	113.276
229.73	96.699	-0.586	113.319
229.89	96.694	-0.588	113.362
230.04	96.689	-0.589	113.406
230.21	96.684	-0.591	113.449
230.37	96.679	-0.593	113.492
230.53	96.675	-0.594	113.536
230.7	96.67	-0.596	113.579
230.86	96.665	-0.598	113.623
231.02	96.66	-0.599	113.666
231.19	96.655	-0.601	113.71
231.35	96.65	-0.603	113.754
231.52	96.645	-0.605	113.798
231.67	96.64	-0.606	113.841
231.83	96.635	-0.608	113.885
232	96.63	-0.61	113.93
232.16	96.625	-0.612	113.974
232.34	96.62	-0.613	114.018
232.49	96.615	-0.615	114.062
232.65	96.61	-0.617	114.106
232.82	96.605	-0.619	114.15
232.98	96.599	-0.621	114.195
233.15	96.594	-0.622	114.239
233.3	96.589	-0.624	114.283
233.45	96.584	-0.626	114.328
233.62	96.579	-0.628	114.372
233.79	96.574	-0.63	114.416
233.96	96.569	-0.632	114.46
234.11	96.563	-0.633	114.504
234.28	96.558	-0.635	114.548
234.45	96.553	-0.637	114.592
234.6	96.548	-0.639	114.636
234.77	96.542	-0.641	114.681
234.93	96.537	-0.643	114.725
235.1	96.532	-0.645	114.769
235.26	96.527	-0.647	114.813
235.42	96.521	-0.649	114.857
235.58	96.516	-0.65	114.901
235.75	96.511	-0.652	114.945
235.91	96.505	-0.654	114.989
236.07	96.5	-0.656	115.033
236.24	96.494	-0.658	115.077
236.4	96.489	-0.66	115.121
236.56	96.484	-0.662	115.165
236.73	96.478	-0.664	115.209
236.88	96.473	-0.666	115.254
237.06	96.467	-0.668	115.298
237.22	96.462	-0.67	115.343
237.37	96.456	-0.672	115.387
237.56	96.451	-0.674	115.432
237.72	96.445	-0.676	115.476
237.88	96.44	-0.678	115.521
238.04	96.434	-0.68	115.566
238.2	96.428	-0.682	115.61
238.36	96.423	-0.684	115.655
238.53	96.417	-0.686	115.7
238.69	96.412	-0.688	115.744
238.84	96.406	-0.69	115.789
239.02	96.4	-0.692	115.834
239.18	96.395	-0.694	115.878
239.34	96.389	-0.696	115.923
239.5	96.383	-0.698	115.968
239.65	96.378	-0.7	116.012
239.82	96.372	-0.703	116.057
239.99	96.366	-0.705	116.102
240.16	96.36	-0.707	116.146
240.31	96.355	-0.709	116.191
240.49	96.349	-0.711	116.235
240.65	96.343	-0.713	116.28
240.82	96.337	-0.715	116.325
240.99	96.331	-0.717	116.369
241.13	96.326	-0.719	116.414
241.3	96.32	-0.722	116.458
241.47	96.314	-0.724	116.503
241.63	96.308	-0.726	116.548
241.79	96.302	-0.728	116.592
241.95	96.296	-0.73	116.637
242.13	96.29	-0.732	116.682
242.28	96.284	-0.734	116.727
242.46	96.278	-0.737	116.772
242.61	96.272	-0.739	116.817
242.78	96.266	-0.741	116.862
242.93	96.26	-0.743	116.907
243.1	96.254	-0.745	116.952
243.27	96.248	-0.747	116.998
243.44	96.242	-0.75	117.043
243.6	96.236	-0.752	117.088
243.77	96.23	-0.754	117.133
243.93	96.224	-0.756	117.178
244.08	96.218	-0.758	117.224
244.26	96.211	-0.761	117.269
244.42	96.205	-0.763	117.314
244.58	96.199	-0.765	117.359
244.75	96.193	-0.767	117.404
244.9	96.187	-0.769	117.45
245.07	96.18	-0.772	117.495
245.24	96.174	-0.774	117.54
245.4	96.168	-0.776	117.585
245.57	96.161	-0.778	117.63
245.74	96.155	-0.781	117.675
245.89	96.149	-0.783	117.72
246.05	96.142	-0.785	117.765
246.22	96.136	-0.788	117.809
246.38	96.129	-0.79	117.854
246.55	96.123	-0.792	117.899
246.71	96.116	-0.794	117.944
246.88	96.11	-0.797	117.989
247.05	96.103	-0.799	118.034
247.2	96.097	-0.801	118.078
247.38	96.09	-0.804	118.123
247.54	96.084	-0.806	118.168
247.7	96.077	-0.808	118.213
247.86	96.07	-0.811	118.257
248.03	96.064	-0.813	118.302
248.2	96.057	-0.815	118.347
248.35	96.05	-0.818	118.392
248.52	96.044	-0.82	118.437
248.69	96.037	-0.823	118.481
248.85	96.03	-0.825	118.526
249.02	96.023	-0.827	118.571
249.18	96.016	-0.83	118.616
249.35	96.009	-0.832	118.661
249.52	96.003	-0.835	118.706
249.67	95.996	-0.837	118.751
249.85	95.989	-0.84	118.796
250	95.982	-0.842	118.841
250.17	95.975	-0.845	118.886
250.33	95.968	-0.847	118.931
250.51	95.961	-0.85	118.976
250.66	95.954	-0.852	119.022
250.83	95.947	-0.855	119.067
250.99	95.94	-0.857	119.112
251.15	95.933	-0.86	119.157
251.32	95.925	-0.862	119.203
251.47	95.918	-0.865	119.248
251.65	95.911	-0.867	119.294
251.82	95.904	-0.87	119.34
251.97	95.897	-0.872	119.385
252.14	95.89	-0.875	119.431
252.31	95.882	-0.878	119.476
252.46	95.875	-0.88	119.522
252.64	95.868	-0.883	119.568
252.81	95.86	-0.885	119.614
252.97	95.853	-0.888	119.659
253.14	95.846	-0.891	119.705
253.3	95.838	-0.893	119.751
253.47	95.831	-0.896	119.796
253.63	95.824	-0.899	119.842
253.79	95.816	-0.902	119.888
253.96	95.809	-0.904	119.934
254.11	95.801	-0.907	119.98
254.29	95.794	-0.91	120.026
254.45	95.786	-0.912	120.072
254.62	95.779	-0.915	120.118
254.78	95.771	-0.918	120.164
254.94	95.763	-0.921	120.21
255.11	95.756	-0.924	120.256
255.28	95.748	-0.926	120.302
255.44	95.74	-0.929	120.349
255.61	95.733	-0.932	120.395
255.77	95.725	-0.935	120.441
255.95	95.717	-0.938	120.488
256.1	95.71	-0.941	120.534
256.26	95.702	-0.943	120.581
256.43	95.694	-0.946	120.627
256.59	95.686	-0.949	120.674
256.77	95.678	-0.952	120.72
256.93	95.671	-0.955	120.767
257.1	95.663	-0.958	120.814
257.25	95.655	-0.961	120.86
257.43	95.647	-0.964	120.907
257.58	95.639	-0.967	120.954
257.75	95.631	-0.97	121.001
257.91	95.623	-0.973	121.048
258.09	95.615	-0.976	121.095
258.25	95.607	-0.979	121.141
258.42	95.599	-0.982	121.189
258.58	95.591	-0.985	121.236
258.75	95.583	-0.988	121.282
258.91	95.574	-0.992	121.329
259.07	95.566	-0.995	121.376
259.24	95.558	-0.998	121.424
259.41	95.55	-1.001	121.471
259.58	95.542	-1.004	121.517
259.74	95.534	-1.007	121.564
259.92	95.525	-1.011	121.611
260.07	95.517	-1.014	121.658
260.24	95.509	-1.017	121.705
260.4	95.5	-1.02	121.752
260.57	95.492	-1.023	121.799
260.73	95.484	-1.027	121.847
260.9	95.475	-1.03	121.894
261.07	95.467	-1.033	121.941
261.23	95.459	-1.036	121.989
261.39	95.45	-1.04	122.036
261.57	95.442	-1.043	122.083
261.74	95.433	-1.046	122.131
261.89	95.425	-1.05	122.178
262.07	95.416	-1.053	122.226
262.23	95.408	-1.056	122.274
262.39	95.399	-1.06	122.321
262.57	95.39	-1.063	122.369
262.72	95.382	-1.066	122.417
262.88	95.373	-1.07	122.465
263.05	95.364	-1.073	122.512
263.22	95.356	-1.076	122.56
263.38	95.347	-1.08	122.608
263.56	95.338	-1.083	122.656
263.72	95.329	-1.087	122.703
263.87	95.32	-1.09	122.751
264.04	95.312	-1.094	122.799
264.23	95.303	-1.097	122.847
264.37	95.294	-1.1	122.894
264.55	95.285	-1.104	122.942
264.71	95.276	-1.107	122.99
264.87	95.267	-1.111	123.038
265.05	95.258	-1.114	123.086
265.21	95.249	-1.118	123.135
265.39	95.24	-1.121	123.183
265.54	95.231	-1.125	123.231
265.71	95.222	-1.129	123.279
265.86	95.213	-1.132	123.327
266.05	95.203	-1.136	123.375
266.2	95.194	-1.139	123.424
266.37	95.185	-1.143	123.472
266.54	95.176	-1.147	123.52
266.7	95.166	-1.15	123.569
266.88	95.157	-1.154	123.617
267.03	95.148	-1.157	123.665
267.21	95.138	-1.161	123.714
267.36	95.129	-1.165	123.762
267.55	95.119	-1.169	123.811
267.7	95.11	-1.172	123.86
267.86	95.1	-1.176	123.908
268.04	95.091	-1.18	123.957
268.21	95.081	-1.184	124.006
268.37	95.072	-1.187	124.055
268.54	95.062	-1.191	124.104
268.7	95.052	-1.195	124.153
268.86	95.043	-1.199	124.203
269.03	95.033	-1.203	124.252
269.21	95.023	-1.206	124.301
269.36	95.013	-1.21	124.351
269.53	95.004	-1.214	124.4
269.71	94.994	-1.218	124.45
269.86	94.984	-1.222	124.5
270.02	94.974	-1.226	124.549
270.19	94.964	-1.23	124.599
270.36	94.954	-1.234	124.649
270.52	94.944	-1.238	124.699
270.69	94.934	-1.242	124.749
270.86	94.924	-1.246	124.799
271.03	94.914	-1.25	124.849
271.19	94.903	-1.254	124.899
271.36	94.893	-1.258	124.95
271.52	94.883	-1.262	125
271.7	94.873	-1.266	125.05
271.86	94.862	-1.271	125.101
272.04	94.852	-1.275	125.151
272.2	94.842	-1.279	125.202
272.36	94.831	-1.283	125.253
272.53	94.821	-1.287	125.303
272.7	94.81	-1.292	125.354
272.87	94.8	-1.296	125.405
273.02	94.789	-1.3	125.456
273.19	94.779	-1.304	125.507
273.36	94.768	-1.309	125.558
273.52	94.757	-1.313	125.609
273.71	94.747	-1.317	125.66
273.87	94.736	-1.322	125.712
274.03	94.725	-1.326	125.763
274.2	94.714	-1.331	125.814
274.37	94.703	-1.335	125.866
274.53	94.692	-1.339	125.917
274.69	94.681	-1.344	125.969
274.86	94.67	-1.348	126.021
275.03	94.659	-1.353	126.073
275.19	94.648	-1.357	126.125
275.37	94.637	-1.362	126.177
275.52	94.626	-1.367	126.229
275.69	94.615	-1.371	126.281
275.86	94.603	-1.376	126.333
276.03	94.592	-1.38	126.386
276.2	94.581	-1.385	126.438
276.36	94.57	-1.39	126.491
276.53	94.558	-1.395	126.543
276.7	94.547	-1.399	126.596
276.86	94.535	-1.404	126.648
277.03	94.524	-1.409	126.701
277.2	94.512	-1.414	126.754
277.37	94.501	-1.418	126.806
277.53	94.489	-1.423	126.859
277.69	94.477	-1.428	126.912
277.86	94.466	-1.433	126.965
278.04	94.454	-1.438	127.018
278.2	94.442	-1.443	127.071
278.37	94.431	-1.448	127.124
278.53	94.419	-1.453	127.177
278.7	94.407	-1.458	127.23
278.85	94.395	-1.463	127.283
279.03	94.383	-1.468	127.336
279.2	94.371	-1.473	127.389
279.36	94.359	-1.478	127.443
279.54	94.347	-1.483	127.496
279.71	94.335	-1.488	127.549
279.87	94.323	-1.493	127.603
280.03	94.311	-1.498	127.656
280.21	94.298	-1.504	127.71
280.37	94.286	-1.509	127.763
280.54	94.274	-1.514	127.817
280.7	94.261	-1.519	127.871
280.87	94.249	-1.524	127.925
281.04	94.237	-1.53	127.979
281.2	94.224	-1.535	128.033
281.38	94.212	-1.54	128.087
281.55	94.199	-1.546	128.141
281.72	94.187	-1.551	128.195
281.88	94.174	-1.556	128.249
282.04	94.161	-1.562	128.304
282.22	94.149	-1.567	128.358
282.38	94.136	-1.573	128.413
282.56	94.123	-1.578	128.467
282.71	94.11	-1.584	128.522
282.88	94.097	-1.589	128.577
283.04	94.084	-1.595	128.632
283.22	94.071	-1.6	128.687
283.38	94.058	-1.606	128.742
283.55	94.045	-1.612	128.797
283.72	94.032	-1.617	128.852
283.88	94.019	-1.623	128.907
284.05	94.006	-1.628	128.962
284.23	93.993	-1.634	129.017
284.4	93.979	-1.64	129.073
284.56	93.966	-1.646	129.128
284.73	93.953	-1.651	129.184
284.89	93.939	-1.657	129.239
285.06	93.926	-1.663	129.294
285.23	93.912	-1.669	129.35
285.39	93.899	-1.674	129.406
285.56	93.885	-1.68	129.462
285.72	93.871	-1.686	129.518
285.9	93.858	-1.692	129.573
286.05	93.844	-1.698	129.63
286.24	93.83	-1.704	129.686
286.4	93.816	-1.71	129.742
286.57	93.802	-1.716	129.799
286.74	93.788	-1.722	129.855
286.9	93.774	-1.728	129.912
287.08	93.76	-1.734	129.968
287.23	93.746	-1.74	130.025
287.41	93.732	-1.746	130.082
287.58	93.718	-1.752	130.138
287.73	93.703	-1.758	130.195
287.91	93.689	-1.764	130.252
288.08	93.675	-1.77	130.309
288.26	93.66	-1.776	130.366
288.41	93.646	-1.782	130.423
288.59	93.631	-1.789	130.481
288.75	93.616	-1.795	130.538
288.92	93.602	-1.801	130.595
289.08	93.587	-1.807	130.652
289.26	93.572	-1.814	130.71
289.42	93.558	-1.82	130.767
289.59	93.543	-1.826	130.825
289.75	93.528	-1.832	130.882
289.92	93.513	-1.839	130.94
290.09	93.498	-1.845	130.998
290.25	93.483	-1.851	131.056
290.42	93.468	-1.858	131.113
290.59	93.452	-1.864	131.171
290.77	93.437	-1.871	131.229
290.93	93.422	-1.877	131.287
291.1	93.406	-1.884	131.345
291.27	93.391	-1.89	131.403
291.42	93.376	-1.896	131.461
291.59	93.36	-1.903	131.519
291.78	93.345	-1.909	131.577
291.94	93.329	-1.916	131.636
292.1	93.313	-1.923	131.694
292.28	93.297	-1.929	131.752
292.43	93.282	-1.936	131.811
292.61	93.266	-1.942	131.869
292.78	93.25	-1.949	131.928
292.94	93.234	-1.956	131.987
293.1	93.218	-1.962	132.046
293.29	93.202	-1.969	132.104
293.45	93.186	-1.976	132.163
293.62	93.169	-1.982	132.222
293.8	93.153	-1.989	132.281
293.96	93.137	-1.996	132.341
294.13	93.12	-2.003	132.4
294.3	93.104	-2.01	132.459
294.46	93.087	-2.017	132.518
294.63	93.071	-2.023	132.578
294.8	93.054	-2.03	132.637
294.96	93.038	-2.037	132.696
295.13	93.021	-2.044	132.756
295.31	93.004	-2.051	132.815
295.47	92.987	-2.058	132.875
295.64	92.97	-2.065	132.934
295.81	92.953	-2.072	132.994
295.97	92.936	-2.079	133.054
296.14	92.919	-2.086	133.113
296.32	92.902	-2.093	133.173
296.48	92.885	-2.1	133.233
296.65	92.867	-2.107	133.293
296.82	92.85	-2.115	133.354
296.99	92.833	-2.122	133.414
297.17	92.815	-2.129	133.474
297.32	92.798	-2.136	133.535
297.49	92.78	-2.143	133.595
297.66	92.763	-2.15	133.656
297.83	92.745	-2.158	133.716
298	92.727	-2.165	133.777
298.16	92.709	-2.172	133.838
298.34	92.691	-2.18	133.899
298.49	92.673	-2.187	133.959
298.67	92.655	-2.194	134.02
298.84	92.637	-2.201	134.081
299.01	92.619	-2.209	134.142
299.18	92.601	-2.216	134.203
299.36	92.583	-2.224	134.264
299.52	92.564	-2.231	134.325
299.69	92.546	-2.238	134.386
299.86	92.528	-2.246	134.447
300.03	92.509	-2.253	134.508
300.2	92.49	-2.261	134.569
300.36	92.472	-2.268	134.631
300.53	92.453	-2.276	134.692
300.69	92.434	-2.283	134.753
300.86	92.415	-2.291	134.814
301.04	92.396	-2.298	134.876
301.21	92.378	-2.306	134.937
301.38	92.358	-2.313	134.999
301.54	92.339	-2.321	135.06
301.72	92.32	-2.329	135.122
301.88	92.301	-2.336	135.184
302.04	92.282	-2.344	135.245
302.22	92.262	-2.351	135.307
302.39	92.243	-2.359	135.369
302.56	92.223	-2.367	135.43
302.73	92.204	-2.374	135.492
302.9	92.184	-2.382	135.554
303.07	92.164	-2.39	135.616
303.22	92.145	-2.397	135.678
303.4	92.125	-2.405	135.74
303.57	92.105	-2.413	135.803
303.75	92.085	-2.421	135.865
303.91	92.065	-2.428	135.927
304.08	92.045	-2.436	135.99
304.24	92.025	-2.444	136.052
304.42	92.005	-2.452	136.115
304.59	91.984	-2.459	136.178
304.75	91.964	-2.467	136.24
[truncated: 5,538 more rows]

## Sheet: VSM diagram of Mag@RF SB-Cu
0	-0.3982
100	4.91093
200	8.23314
300	10.5793
400	12.3396
500	13.6574
750	15.8029
1000	17.1894
1500	18.8712
2000	19.9238
2500	20.659
3000	21.2318
3500	21.6819
4000	22.0652
4500	22.3765
5000	22.6504
5500	22.8961
6000	23.1095
6500	23.2988
7000	23.4754
7500	23.6397
8000	23.7796
8500	23.8999
9000	24.0438
9500	24.1375
10000	24.2301
9500	24.1533
9000	24.0397
8500	23.9155
8000	23.7862
7500	23.6627
7000	23.5127
6500	23.3308
6000	23.1505
5500	22.9516
5000	22.7038
4500	22.4375
4000	22.128
3500	21.7537
3000	21.3022
2500	20.7611
2000	20.0377
1500	19.004
1000	17.3402
750	16.0122
500	13.8451
400	12.6082
300	10.9417
200	8.76451
100	5.7069
0	0.83409
-100	-4.86903
-200	-8.32046
-300	-10.6352
-400	-12.3828
-750	-15.8022
-1000	-17.1921
-1500	-18.854
-2000	-19.9088
-2500	-20.6455
-3000	-21.2137
-3500	-21.6632
-4000	-22.0366
-4500	-22.3563
-5000	-22.6226
-5500	-22.8686
-6000	-23.0807
-6500	-23.2611
-7000	-23.4413
-7500	-23.6017
-8000	-23.7331
-8500	-23.8688
-9000	-23.9786
-9500	-24.0884
-10000	-24.1983
-9500	-24.0832
-9000	-23.9871
-8500	-23.8629
-8000	-23.7401
-7500	-23.5985
-7000	-23.4378
-6500	-23.2754
-6000	-23.0751
-5500	-22.8774
-5000	-22.6289
-4500	-22.3602
-4000	-22.0493
-3500	-21.6782
-3000	-21.2328
-2500	-20.6835
-2000	-19.9411
-1500	-18.9068
-1000	-17.2411
-750	-15.9037
-500	-13.771
-400	-12.521
-300	-10.8477
-200	-8.65959
-100	-5.40482
0	-0.3982

## Sheet: FT-IR spectra of recovered cat.
4000	115.44
3999	115.439
3998	115.438
3997	115.436
3996	115.435
3995	115.424
3994	115.422
3993	115.421
3992	115.409
3991	115.408
3990	115.397
3989	115.395
3988	115.384
3987	115.383
3986	115.371
3985	115.36
3984	115.348
3983	115.337
3982	115.326
3981	115.324
3980	115.323
3979	115.312
3978	115.31
3977	115.309
3976	115.307
3975	115.306
3974	115.305
3973	115.303
3972	115.312
3971	115.311
3970	115.319
3969	115.328
3968	115.337
3967	115.335
3966	115.344
3965	115.342
3964	115.341
3963	115.35
3962	115.358
3961	115.367
3960	115.376
3959	115.384
3958	115.403
3957	115.411
3956	115.43
3955	115.439
3954	115.457
3953	115.476
3952	115.485
3951	115.503
3950	115.502
3949	115.5
3948	115.499
3947	115.498
3946	115.496
3945	115.485
3944	115.474
3943	115.452
3942	115.431
3941	115.399
3940	115.378
3939	115.367
3938	115.355
3937	115.344
3936	115.343
3935	115.331
3934	115.33
3933	115.328
3932	115.327
3931	115.336
3930	115.344
3929	115.353
3928	115.362
3927	115.37
3926	115.369
3925	115.367
3924	115.356
3923	115.335
3922	115.303
3921	115.272
3920	115.221
3919	115.169
3918	115.108
3917	115.046
3916	114.995
3915	114.934
3914	114.892
3913	114.861
3912	114.85
3911	114.848
3910	114.867
3909	114.896
3908	114.944
3907	115.003
3906	115.061
3905	115.12
3904	115.179
3903	115.227
3902	115.276
3901	115.305
3900	115.333
3899	115.352
3898	115.36
3897	115.369
3896	115.378
3895	115.386
3894	115.385
3893	115.384
3892	115.382
3891	115.381
3890	115.369
3889	115.378
3888	115.387
3887	115.395
3886	115.374
3885	115.353
3884	115.321
3883	115.27
3882	115.208
3881	115.147
3880	115.086
3879	115.034
3878	114.983
3877	114.952
3876	114.9
3875	114.849
3874	114.787
3873	114.736
3872	114.685
3871	114.623
3870	114.562
3869	114.491
3868	114.429
3867	114.378
3866	114.346
3865	114.315
3864	114.304
3863	114.322
3862	114.371
3861	114.45
3860	114.548
3859	114.647
3858	114.766
3857	114.894
3856	115.023
3855	115.151
3854	115.26
3853	115.339
3852	115.387
3851	115.396
3850	115.355
3849	115.283
3848	115.192
3847	115.1
3846	115.009
3845	114.938
3844	114.876
3843	114.835
3842	114.814
3841	114.802
3840	114.821
3839	114.839
3838	114.878
3837	114.927
3836	114.965
3835	115.014
3834	115.043
3833	115.051
3832	115.05
3831	115.038
3830	115.027
3829	115.026
3828	115.024
3827	115.033
3826	115.032
3825	115.05
3824	115.089
3823	115.127
3822	115.156
3821	115.185
3820	115.213
3819	115.242
3818	115.261
3817	115.269
3816	115.258
3815	115.246
3814	115.215
3813	115.184
3812	115.152
3811	115.121
3810	115.11
3809	115.118
3808	115.137
3807	115.176
3806	115.224
3805	115.283
3804	115.351
3803	115.41
3802	115.469
3801	115.497
3800	115.526
3799	115.535
3798	115.513
3797	115.472
3796	115.41
3795	115.349
3794	115.278
3793	115.216
3792	115.165
3791	115.114
3790	115.072
3789	115.051
3788	115.049
3787	115.058
3786	115.077
3785	115.105
3784	115.144
3783	115.193
3782	115.261
3781	115.33
3780	115.408
3779	115.477
3778	115.556
3777	115.624
3776	115.693
3775	115.752
3774	115.8
3773	115.829
3772	115.857
3771	115.856
3770	115.845
3769	115.853
3768	115.802
3767	115.731
3766	115.619
3765	115.508
3764	115.376
3763	115.255
3762	115.154
3761	115.062
3760	115.001
3759	114.96
3758	114.958
3757	114.987
3756	115.036
3755	115.124
3754	115.273
3753	115.371
3752	115.43
3751	115.419
3750	115.407
3749	115.346
3748	115.255
3747	115.103
3746	114.972
3745	114.76
3744	114.489
3743	114.158
3742	113.776
3741	113.355
3740	112.894
3739	112.422
3738	111.941
3737	111.459
3736	110.988
3735	110.527
3734	110.075
3733	109.644
3732	109.223
3731	108.821
3730	108.42
3729	108.038
3728	107.667
3727	107.306
3726	106.964
3725	106.633
3724	106.322
3723	106.02
3722	105.739
3721	105.477
3720	105.226
3719	104.985
3718	104.773
3717	104.562
3716	104.371
3715	104.179
3714	103.988
3713	103.776
3712	103.565
3711	103.334
3710	103.082
3709	102.821
3708	102.54
3707	102.248
3706	101.937
3705	101.626
3704	101.314
3703	101.003
3702	100.701
3701	100.4
3700	100.129
3699	99.8773
3698	99.6359
3697	99.4245
3696	99.2132
3695	99.0118
3694	98.8304
3693	98.639
3692	98.4477
3691	98.2563
3690	98.0549
3689	97.8535
3688	97.6522
3687	97.4408
3686	97.2294
3685	96.9981
3684	96.7667
3683	96.5453
3682	96.3239
3681	96.1026
3680	95.8912
3679	95.6898
3678	95.4784
3677	95.2571
3676	95.0057
3675	94.7143
3674	94.403
3673	94.0516
3672	93.6502
3671	93.2088
3670	92.7175
3669	92.1961
3668	91.6247
3667	91.0333
3666	90.432
3665	89.8106
3664	89.1892
3663	88.5879
3662	88.0065
3661	87.4451
3660	86.9237
3659	86.4224
3658	85.951
3657	85.5096
3656	85.0883
3655	84.6669
3654	84.2555
3653	83.8241
3652	83.3828
3651	82.9114
3650	82.41
3649	81.8886
3648	81.3273
3647	80.7459
3646	80.1245
3645	79.4831
3644	78.8218
3643	78.1604
3642	77.499
3641	76.8377
3640	76.1963
3639	75.5849
3638	74.9835
3637	74.4122
3636	73.8608
3635	73.3194
3634	72.8081
3633	72.2967
3632	71.8053
3631	71.3239
3630	70.8326
3629	70.3412
3628	69.8398
3627	69.3285
3626	68.7971
3625	68.2657
3624	67.7143
3623	67.153
3622	66.5916
3621	66.0402
3620	65.4788
3619	64.9175
3618	64.3561
3617	63.8047
3616	63.2634
3615	62.712
3614	62.1706
3613	61.6292
3612	61.0879
3611	60.5565
3610	60.0251
3609	59.5037
3608	58.9724
3607	58.451
3606	57.9196
3605	57.3982
3604	56.8869
3603	56.3755
3602	55.8741
3601	55.3928
3600	54.9114
3599	54.45
3598	53.9986
3597	53.5573
3596	53.1259
3595	52.6945
3594	52.2831
3593	51.8718
3592	51.4704
3591	51.069
3590	50.6777
3589	50.2863
3588	49.8849
3587	49.4935
3586	49.1022
3585	48.7208
3584	48.3294
3583	47.9481
3582	47.5767
3581	47.2153
3580	46.8539
3579	46.5026
3578	46.1512
3577	45.8198
3576	45.4885
3575	45.1771
3574	44.8657
3573	44.5643
3572	44.263
3571	43.9716
3570	43.6802
3569	43.3888
3568	43.1075
3567	42.8161
3566	42.5347
3565	42.2533
3564	41.972
3563	41.6806
3562	41.3992
3561	41.1179
3560	40.8365
3559	40.5651
3558	40.2937
3557	40.0224
3556	39.761
3555	39.4996
3554	39.2383
3553	38.9869
3552	38.7355
3551	38.4941
3550	38.2528
3549	38.0114
3548	37.78
3547	37.5486
3546	37.3173
3545	37.0859
3544	36.8645
3543	36.6531
3542	36.4418
3541	36.2304
3540	36.029
3539	35.8277
3538	35.6263
3537	35.4349
3536	35.2435
3535	35.0522
3534	34.8608
3533	34.6794
3532	34.4881
3531	34.3067
3530	34.1253
3529	33.9339
3528	33.7526
3527	33.5612
3526	33.3798
3525	33.1885
3524	33.0071
3523	32.8157
3522	32.6343
3521	32.453
3520	32.2716
3519	32.0902
3518	31.9088
3517	31.7275
3516	31.5461
3515	31.3647
3514	31.1933
3513	31.012
3512	30.8406
3511	30.6692
3510	30.4979
3509	30.3265
3508	30.1651
3507	29.9937
3506	29.8224
3505	29.651
3504	29.4896
3503	29.3283
3502	29.1669
3501	29.0055
3500	28.8541
3499	28.7028
3498	28.5514
3497	28.4
3496	28.2586
3495	28.1173
3494	27.9759
3493	27.8445
3492	27.7032
3491	27.5718
3490	27.4504
3489	27.319
3488	27.1977
3487	27.0763
3486	26.9549
3485	26.8435
3484	26.7222
3483	26.6108
3482	26.4994
3481	26.3981
3480	26.2867
3479	26.1853
3478	26.0839
3477	25.9826
3476	25.8812
3475	25.7898
3474	25.6984
3473	25.6071
3472	25.5177
3471	25.4411
3470	25.3645
3469	25.2879
3468	25.2213
3467	25.1547
3466	25.0881
3465	25.0315
3464	24.9649
3463	24.9083
3462	24.8516
3461	24.795
3460	24.7484
3459	24.6918
3458	24.6453
3457	24.5886
3456	24.542
3455	24.4954
3454	24.4488
3453	24.3922
3452	24.3456
3451	24.299
3450	24.2524
3449	24.2058
3448	24.1592
3447	24.1126
3446	24.076
3445	24.0294
3444	23.9928
3443	23.9462
3442	23.9096
3441	23.883
3440	23.8464
3439	23.8098
3438	23.7832
3437	23.7566
3436	23.74
3435	23.7134
3434	23.7068
3433	23.6902
3432	23.6836
3431	23.677
3430	23.6704
3429	23.6738
3428	23.6772
3427	23.6806
3426	23.684
3425	23.6874
3424	23.6908
3423	23.7042
3422	23.7076
3421	23.711
3420	23.7144
3419	23.7178
3418	23.7312
3417	23.7346
3416	23.738
3415	23.7414
3414	23.7548
3413	23.7582
3412	23.7615
3411	23.7649
3410	23.7783
3409	23.7817
3408	23.7951
3407	23.8085
3406	23.8219
3405	23.8353
3404	23.8487
3403	23.8621
3402	23.8755
3401	23.8989
3400	23.9123
3399	23.9357
3398	23.9591
3397	23.9925
3396	24.0159
3395	24.0493
3394	24.0827
3393	24.1161
3392	24.1495
3391	24.1829
3390	24.2263
3389	24.2697
3388	24.3131
3387	24.3565
3386	24.3999
3385	24.4433
3384	24.4867
3383	24.5301
3382	24.5735
3381	24.6069
3380	24.6503
3379	24.6937
3378	24.7371
3377	24.7805
3376	24.8239
3375	24.8673
3374	24.9107
3373	24.9641
3372	25.0075
3371	25.0609
3370	25.1143
3369	25.1677
3368	25.2311
3367	25.2945
3366	25.3579
3365	25.4313
3364	25.4947
3363	25.568
3362	25.6315
3361	25.7049
3360	25.7682
3359	25.8417
3358	25.905
3357	25.9784
3356	26.0418
3355	26.1152
3354	26.1786
3353	26.242
3352	26.3054
3351	26.3688
3350	26.4422
3349	26.5056
3348	26.569
3347	26.6424
3346	26.7058
3345	26.7792
3344	26.8426
3343	26.916
3342	26.9894
3341	27.0628
3340	27.1362
3339	27.2096
3338	27.283
3337	27.3564
3336	27.4298
3335	27.5032
3334	27.5766
3333	27.65
3332	27.7334
3331	27.8068
3330	27.8802
3329	27.9536
3328	28.027
3327	28.1004
3326	28.1738
3325	28.2572
3324	28.3306
3323	28.394
3322	28.4674
3321	28.5408
3320	28.6142
3319	28.6776
3318	28.741
3317	28.8044
3316	28.8678
3315	28.9312
3314	28.9946
3313	29.048
3312	29.1114
3311	29.1648
3310	29.2281
3309	29.2815
3308	29.3449
3307	29.3983
3306	29.4617
3305	29.5151
3304	29.5785
3303	29.6419
3302	29.7053
3301	29.7687
3300	29.8321
3299	29.8955
3298	29.9589
3297	30.0223
3296	30.0757
3295	30.1391
3294	30.2025
3293	30.2559
3292	30.3193
3291	30.3727
3290	30.4361
3289	30.4895
3288	30.5429
3287	30.6063
3286	30.6597
3285	30.7131
3284	30.7565
3283	30.8099
3282	30.8533
3281	30.9067
3280	30.9501
3279	30.9935
3278	31.0369
3277	31.0703
3276	31.1137
3275	31.1571
3274	31.1905
3273	31.2339
3272	31.2673
3271	31.3107
3270	31.3541
3269	31.3975
3268	31.4409
3267	31.4843
3266	31.5377
3265	31.5811
3264	31.6245
3263	31.6778
3262	31.7213
3261	31.7747
3260	31.818
3259	31.8615
3258	31.9048
3257	31.9582
3256	32.0016
3255	32.045
3254	32.0884
3253	32.1318
3252	32.1852
3251	32.2286
3250	32.272
3249	32.3154
3248	32.3688
3247	32.4122
3246	32.4656
3245	32.509
3244	32.5624
3243	32.6058
3242	32.6592
3241	32.7026
3240	32.756
3239	32.8094
3238	32.8528
3237	32.9062
3236	32.9596
3235	33.013
3234	33.0564
3233	33.1098
3232	33.1632
3231	33.2166
3230	33.27
3229	33.3234
3228	33.3768
3227	33.4302
3226	33.4836
3225	33.537
3224	33.5904
3223	33.6438
3222	33.6972
3221	33.7606
3220	33.814
3219	33.8674
3218	33.9208
3217	33.9742
3216	34.0276
3215	34.081
3214	34.1344
3213	34.1977
3212	34.2512
3211	34.3145
3210	34.368
3209	34.4314
3208	34.4947
3207	34.5481
3206	34.6115
3205	34.6749
3204	34.7383
3203	34.8017
3202	34.8751
3201	34.9385
3200	35.0019
3199	35.0753
3198	35.1387
3197	35.2121
3196	35.2755
3195	35.3489
3194	35.4223
3193	35.4957
3192	35.5691
3191	35.6425
3190	35.7159
3189	35.7893
3188	35.8627
3187	35.9361
3186	36.0195
3185	36.0929
3184	36.1663
3183	36.2497
3182	36.3231
3181	36.3965
3180	36.4799
3179	36.5533
3178	36.6267
3177	36.7001
3176	36.7835
3175	36.8569
3174	36.9303
3173	37.0037
3172	37.0771
3171	37.1505
3170	37.2239
3169	37.2873
3168	37.3607
3167	37.4341
3166	37.4975
3165	37.5609
3164	37.6343
3163	37.6977
3162	37.761
3161	37.8244
3160	37.8879
3159	37.9512
3158	38.0146
3157	38.078
3156	38.1414
3155	38.2148
3154	38.2782
3153	38.3416
3152	38.405
3151	38.4684
3150	38.5418
3149	38.6052
3148	38.6786
3147	38.742
3146	38.8154
3145	38.8788
3144	38.9422
3143	39.0056
3142	39.079
3141	39.1424
3140	39.2058
3139	39.2692
3138	39.3326
3137	39.406
3136	39.4694
3135	39.5328
3134	39.5962
3133	39.6696
3132	39.723
3131	39.7864
3130	39.8498
3129	39.9032
3128	39.9666
3127	40.02
3126	40.0734
3125	40.1268
3124	40.1702
3123	40.2236
3122	40.267
3121	40.3204
3120	40.3738
3119	40.4272
3118	40.4806
3117	40.544
3116	40.6074
3115	40.6708
3114	40.7341
3113	40.8075
3112	40.8809
3111	40.9543
3110	41.0277
3109	41.1011
3108	41.1745
3107	41.2579
3106	41.3313
3105	41.4047
3104	41.4781
3103	41.5515
3102	41.6149
3101	41.6883
3100	41.7517
3099	41.8051
3098	41.8685
3097	41.9219
3096	41.9853
3095	42.0387
3094	42.0821
3093	42.1355
3092	42.1789
3091	42.2223
3090	42.2657
3089	42.3091
3088	42.3525
3087	42.3859
3086	42.4293
3085	42.4827
3084	42.5261
3083	42.5695
3082	42.6229
3081	42.6763
3080	42.7297
3079	42.7831
3078	42.8365
3077	42.8899
3076	42.9533
3075	43.0167
3074	43.0801
3073	43.1435
3072	43.1969
3071	43.2603
3070	43.3137
3069	43.3771
3068	43.4305
3067	43.4939
3066	43.5573
3065	43.6107
3064	43.6733
3063	43.733
3062	43.7826
3061	43.8423
3060	43.9019
3059	43.9616
3058	44.0212
3057	44.0709
3056	44.1305
3055	44.1902
3054	44.2498
3053	44.2995
3052	44.3491
3051	44.4088
3050	44.4584
3049	44.5081
3048	44.5577
3047	44.6174
3046	44.667
3045	44.7167
3044	44.7663
3043	44.8159
3042	44.8656
3041	44.9152
3040	44.9649
3039	45.0245
3038	45.0742
3037	45.1338
3036	45.1835
3035	45.2331
3034	45.2928
3033	45.3424
3032	45.4021
3031	45.4617
3030	45.5214
3029	45.571
3028	45.6307
3027	45.6903
3026	45.74
3025	45.7996
3024	45.8492
3023	45.8989
3022	45.9586
3021	46.0082
3020	46.0578
3019	46.1175
3018	46.1671
3017	46.2168
3016	46.2664
3015	46.3161
3014	46.3757
3013	46.4254
3012	46.485
3011	46.5347
3010	46.5943
3009	46.644
3008	46.7036
3007	46.7633
3006	46.8129
3005	46.8626
3004	46.9022
3003	46.9519
3002	46.9915
3001	47.0311
3000	47.0608
2999	47.0904
2998	47.1201
2997	47.1497
2996	47.1694
2995	47.179
2994	47.1987
2993	47.2083
2992	47.208
2991	47.2176
2990	47.2173
2989	47.2069
2988	47.1966
2987	47.1762
2986	47.1459
2985	47.1155
2984	47.0652
2983	47.0148
2982	46.9545
2981	46.8841
2980	46.8038
2979	46.7134
2978	46.6131
2977	46.5027
2976	46.3924
2975	46.272
2974	46.1516
2973	46.0413
2972	45.9209
2971	45.8106
2970	45.7002
2969	45.6099
2968	45.5295
2967	45.4592
2966	45.4088
2965	45.3685
2964	45.3481
2963	45.3478
2962	45.3574
2961	45.3871
2960	45.4267
2959	45.4664
2958	45.526
2957	45.5857
2956	45.6553
2955	45.7249
2954	45.7846
2953	45.8443
2952	45.9039
2951	45.9535
2950	45.9932
2949	46.0328
2948	46.0625
2947	46.0821
2946	46.0918
2945	46.1014
2944	46.1111
2943	46.1107
2942	46.1104
2941	46.11
2940	46.0997
2939	46.0993
2938	46.089
2937	46.0886
2936	46.0883
2935	46.0979
2934	46.1076
2933	46.1272
2932	46.1568
2931	46.1865
2930	46.2362
2929	46.2858
2928	46.3454
2927	46.4251
2926	46.5047
2925	46.5844
2924	46.684
2923	46.7837
2922	46.8933
2921	47.013
2920	47.1326
2919	47.2523
2918	47.3819
2917	47.5116
2916	47.6412
2915	47.7709
2914	47.9005
2913	48.0402
2912	48.1698
2911	48.3095
2910	48.4391
2909	48.5688
2908	48.6984
2907	48.828
2906	48.9577
2905	49.0873
2904	49.207
2903	49.3266
2902	49.4463
2901	49.5559
2900	49.6756
2899	49.7852
2898	49.8949
2897	50.0045
2896	50.1042
2895	50.2138
2894	50.3135
2893	50.4231
2892	50.5228
2891	50.6224
2890	50.7221
2889	50.8217
2888	50.9114
2887	51.001
2886	51.0906
2885	51.1803
2884	51.26
2883	51.3396
2882	51.4192
2881	51.4889
2880	51.5685
2879	51.6382
2878	51.7178
2877	51.7875
2876	51.8671
2875	51.9368
2874	52.0164
2873	52.0961
2872	52.1857
2871	52.2754
2870	52.375
2869	52.4647
2868	52.5743
2867	52.684
2866	52.7936
2865	52.9033
2864	53.0229
2863	53.1525
2862	53.2722
2861	53.4119
2860	53.5515
2859	53.6912
2858	53.8408
2857	53.9904
2856	54.1501
2855	54.3097
2854	54.4794
2853	54.649
2852	54.8287
2851	55.0083
2850	55.188
2849	55.3776
2848	55.5673
2847	55.7569
2846	55.9466
2845	56.1462
2844	56.3359
2843	56.5255
2842	56.7152
2841	56.9048
2840	57.0844
2839	57.2741
2838	57.4537
2837	57.6334
2836	57.813
2835	57.9927
2834	58.1623
2833	58.342
2832	58.5116
2831	58.6813
2830	58.8409
2829	59.0106
2828	59.1802
2827	59.3399
2826	59.4995
2825	59.6592
2824	59.8188
2823	59.9685
2822	60.1181
2821	60.2678
2820	60.4174
2819	60.5671
2818	60.7167
2817	60.8564
2816	61.006
2815	61.1457
2814	61.2853
2813	61.435
2812	61.5746
2811	61.7142
2810	61.8539
2809	61.9935
2808	62.1332
2807	62.2728
2806	62.4125
2805	62.5521
2804	62.6918
2803	62.8314
2802	62.9711
2801	63.1107
2800	63.2404
2799	63.38
2798	63.5197
2797	63.6493
2796	63.789
2795	63.9286
2794	64.0683
2793	64.2079
2792	64.3375
2791	64.4772
2790	64.6168
2789	64.7465
2788	64.8861
2787	65.0158
2786	65.1454
2785	65.2851
2784	65.4147
2783	65.5444
2782	65.664
2781	65.7937
2780	65.9133
2779	66.033
2778	66.1526
2777	66.2723
2776	66.3919
2775	66.5116
2774	66.6312
2773	66.7509
2772	66.8705
2771	66.9802
2770	67.0998
2769	67.2194
2768	67.3291
2767	67.4488
2766	67.5584
2765	67.668
2764	67.7777
2763	67.8873
2762	67.997
2761	68.1066
2760	68.2163
2759	68.3159
2758	68.4256
2757	68.5252
2756	68.6249
2755	68.7245
2754	68.8342
2753	68.9338
2752	69.0335
2751	69.1331
2750	69.2328
2749	69.3424
2748	69.4421
2747	69.5417
2746	69.6513
2745	69.761
2744	69.8607
2743	69.9703
2742	70.0799
2741	70.1896
2740	70.2992
2739	70.4089
2738	70.5185
2737	70.6382
2736	70.7478
2735	70.8575
2734	70.9671
2733	71.0768
2732	71.1864
2731	71.2961
2730	71.4057
2729	71.5154
2728	71.625
2727	71.7347
2726	71.8543
2725	71.964
2724	72.0736
2723	72.1933
2722	72.3129
2721	72.4226
2720	72.5422
2719	72.6518
2718	72.7715
2717	72.8811
2716	73.0008
2715	73.1104
2714	73.2301
2713	73.3397
2712	73.4494
2711	73.559
2710	73.6687
2709	73.7783
2708	73.888
2707	73.9976
2706	74.1073
2705	74.2169
2704	74.3266
2703	74.4262
2702	74.5359
2701	74.6455
2700	74.7552
2699	74.8648
2698	74.9745
2697	75.0841
2696	75.1837
2695	75.2934
2694	75.403
2693	75.5027
2692	75.6123
2691	75.712
2690	75.8216
2689	75.9213
2688	76.0309
2687	76.1306
2686	76.2302
2685	76.3399
2684	76.4395
2683	76.5392
2682	76.6388
2681	76.7385
2680	76.8381
2679	76.9378
2678	77.0274
2677	77.127
2676	77.2267
2675	77.3264
2674	77.416
2673	77.5156
2672	77.6053
2671	77.7049
2670	77.795
2669	77.8959
2668	77.9968
2667	78.0877
2666	78.1886
2665	78.2896
2664	78.3805
2663	78.4814
2662	78.5823
2661	78.6833
2660	78.7842
2659	78.8851
2658	78.986
2657	79.087
2656	79.1879
2655	79.2888
2654	79.3897
2653	79.4906
2652	79.5816
2651	79.6825
2650	79.7834
2649	79.8743
2648	79.9753
2647	80.0662
2646	80.1571
2645	80.248
2644	80.3389
2643	80.4299
2642	80.5108
2641	80.6017
2640	80.6926
2639	80.7836
2638	80.8745
2637	80.9654
2636	81.0563
2635	81.1472
2634	81.2382
2633	81.3291
2632	81.43
2631	81.5309
2630	81.6218
2629	81.7228
2628	81.8237
2627	81.9246
2626	82.0255
2625	82.1165
2624	82.2174
2623	82.3183
2622	82.4192
2621	82.5202
2620	82.6211
2619	82.722
2618	82.8129
2617	82.9138
2616	83.0148
2615	83.1157
2614	83.2066
2613	83.3075
2612	83.4085
2611	83.4994
2610	83.6003
2609	83.7012
2608	83.7921
2607	83.8931
2606	83.994
2605	84.0949
2604	84.1958
2603	84.2968
2602	84.3977
2601	84.4986
2600	84.5995
2599	84.7104
2598	84.8114
2597	84.9223
2596	85.0232
2595	85.1341
2594	85.2451
2593	85.356
2592	85.4669
2591	85.5678
2590	85.6787
2589	85.7897
2588	85.9006
2587	86.0115
2586	86.1224
2585	86.2334
2584	86.3343
2583	86.4452
2582	86.5561
2581	86.657
2580	86.768
2579	86.8789
2578	86.9898
2577	87.1007
2576	87.2017
2575	87.3126
2574	87.4235
2573	87.5344
2572	87.6453
2571	87.7563
2570	87.8572
2569	87.9681
2568	88.079
2567	88.19
2566	88.3009
2565	88.4118
2564	88.5327
2563	88.6436
2562	88.7546
2561	88.8655
2560	88.9764
2559	89.0873
2558	89.1983
2557	89.3092
2556	89.4201
2555	89.531
2554	89.6419
2553	89.7429
2552	89.8538
2551	89.9547
2550	90.0656
2549	90.1666
2548	90.2775
2547	90.3784
2546	90.4893
2545	90.6003
2544	90.7012
2543	90.8121
2542	90.923
2541	91.0239
2540	91.1349
2539	91.2458
2538	91.3567
2537	91.4576
2536	91.5686
2535	91.6795
2534	91.7804
2533	91.8913
2532	91.9922
2531	92.0932
2530	92.2041
2529	92.305
2528	92.4059
2527	92.5069
2526	92.6078
2525	92.7087
2524	92.8096
2523	92.9205
2522	93.0215
2521	93.1324
2520	93.2333
2519	93.3442
2518	93.4552
2517	93.5761
2516	93.687
2515	93.8079
2514	93.9188
2513	94.0398
2512	94.1607
2511	94.2816
2510	94.3925
2509	94.5135
2508	94.6244
2507	94.7453
2506	94.8562
2505	94.9771
2504	95.0881
2503	95.199
2502	95.3099
2501	95.4208
2500	95.5318
2499	95.6427
2498	95.7536
2497	95.8545
2496	95.9654
2495	96.0664
2494	96.1773
2493	96.2782
2492	96.3791
2491	96.4801
2490	96.581
2489	96.6919
2488	96.7928
2487	96.8937
2486	96.9947
2485	97.0956
2484	97.1965
2483	97.3074
2482	97.4083
2481	97.5093
2480	97.6102
2479	97.7111
2478	97.822
2477	97.923
2476	98.0239
2475	98.1248
2474	98.2357
2473	98.3367
2472	98.4376
2471	98.5385
2470	98.6394
2469	98.7403
2468	98.8413
2467	98.9422
2466	99.0431
2465	99.144
2464	99.245
2463	99.3359
2462	99.4368
2461	99.5277
2460	99.6286
2459	99.7196
2458	99.8205
2457	99.9114
2456	100.012
2455	100.113
2454	100.204
2453	100.305
2452	100.406
2451	100.507
2450	100.608
2449	100.709
2448	100.82
2447	100.921
2446	101.022
2445	101.132
2444	101.233
2443	101.334
2442	101.435
2441	101.546
2440	101.647
2439	101.738
2438	101.839
2437	101.94
2436	102.041
2435	102.132
2434	102.233
2433	102.324
2432	102.424
2431	102.515
2430	102.616
2429	102.717
2428	102.808
2427	102.909
2426	103.01
2425	103.111
2424	103.212
2423	103.313
2422	103.414
2421	103.525
2420	103.626
2419	103.726
2418	103.827
2417	103.928
2416	104.029
2415	104.13
2414	104.231
2413	104.332
2412	104.423
2411	104.524
2410	104.625
2409	104.716
2408	104.817
2407	104.918
2406	105.008
2405	105.109
2404	105.21
2403	105.301
2402	105.402
2401	105.493
2400	105.594
2399	105.675
2398	105.766
2397	105.837
2396	105.908
2395	105.969
2394	106.02
2393	106.07
2392	106.111
2391	106.142
2390	106.183
2389	106.234
2388	106.285
2387	106.346
2386	106.417
2385	106.518
2384	106.629
2383	106.77
2382	106.931
2381	107.122
2380	107.342
2379	107.573
2378	107.834
2377	108.105
2376	108.396
2375	108.687
2374	108.998
2373	109.309
2372	109.64
2371	109.981
2370	110.332
2369	110.712
2368	111.091
2367	111.49
2366	111.859
2365	112.218
2364	112.527
2363	112.816
2362	113.075
2361	113.314
2360	113.513
2359	113.662
2358	113.751
2357	113.76
2356	113.699
2355	113.558
2354	113.367
2353	113.156
2352	112.955
2351	112.804
2350	112.683
2349	112.582
2348	112.491
2347	112.42
2346	112.389
2345	112.418
2344	112.517
2343	112.676
2342	112.895
2341	113.155
2340	113.454
2339	113.753
2338	114.052
2337	114.341
2336	114.62
2335	114.899
2334	115.178
2333	115.437
2332	115.666
2331	115.865
2330	116.024
2329	116.163
2328	116.272
2327	116.351
2326	116.39
2325	116.399
2324	116.378
2323	116.337
2322	116.266
2321	116.165
2320	116.044
2319	115.913
2318	115.772
2317	115.621
2316	115.46
2315	115.289
2314	115.128
2313	114.977
2312	114.836
2311	114.705
2310	114.594
2309	114.504
2308	114.423
2307	114.352
2306	114.301
2305	114.27
2304	114.249
2303	114.248
2302	114.257
2301	114.276
2300	114.305
2299	114.334
2298	114.383
2297	114.422
2296	114.481
2295	114.53
2294	114.589
2293	114.648
2292	114.717
2291	114.776
2290	114.835
2289	114.894
2288	114.953
2287	115.002
2286	115.051
2285	115.11
2284	115.159
2283	115.198
2282	115.247
2281	115.286
2280	115.335
2279	115.374
2278	115.424
2277	115.463
2276	115.512
2275	115.551
2274	115.6
2273	115.639
2272	115.678
2271	115.727
2270	115.766
2269	115.805
2268	115.844
2267	115.883
2266	115.922
2265	115.961
2264	115.99
2263	116.019
2262	116.058
2261	116.087
2260	116.106
2259	116.135
2258	116.154
2257	116.183
2256	116.202
2255	116.211
2254	116.23
2253	116.249
2252	116.258
2251	116.277
2250	116.286
2249	116.295
2248	116.304
2247	116.313
2246	116.313
2245	116.322
2244	116.321
2243	116.32
2242	116.319
2241	116.318
2240	116.307
2239	116.296
2238	116.285
2237	116.264
2236	116.253
2235	116.232
2234	116.201
2233	116.18
2232	116.159
2231	116.128
2230	116.097
2229	116.066
2228	116.035
2227	116.014
2226	115.983
2225	115.952
2224	115.921
2223	115.89
2222	115.859
2221	115.838
2220	115.807
2219	115.776
2218	115.755
2217	115.724
2216	115.703
2215	115.683
2214	115.672
2213	115.651
2212	115.64
2211	115.629
2210	115.628
2209	115.617
2208	115.616
2207	115.615
2206	115.614
2205	115.623
2204	115.622
2203	115.631
2202	115.64
2201	115.649
2200	115.658
2199	115.667
2198	115.676
2197	115.695
2196	115.714
2195	115.733
2194	115.752
2193	115.771
2192	115.79
2191	115.809
2190	115.828
2189	115.857
2188	115.876
2187	115.895
2186	115.914
2185	115.923
2184	115.942
2183	115.952
2182	115.971
2181	115.98
2180	115.989
2179	115.998
2178	115.997
2177	116.006
2176	116.005
2175	116.014
2174	116.013
2173	116.012
2172	116.021
2171	116.02
2170	116.019
2169	116.028
2168	116.027
2167	116.036
2166	116.045
2165	116.044
2164	116.053
2163	116.062
2162	116.061
2161	116.07
2160	116.069
2159	116.078
2158	116.077
2157	116.086
2156	116.085
2155	116.084
2154	116.083
2153	116.092
2152	116.091
2151	116.091
2150	116.08
2149	116.079
2148	116.078
2147	116.077
2146	116.066
2145	116.065
2144	116.054
2143	116.043
2142	116.042
2141	116.031
2140	116.02
2139	116.009
2138	116.008
2137	116.017
2136	116.016
2135	116.005
2134	116.004
2133	116.003
2132	116.002
2131	116.011
2130	116.01
2129	116.009
2128	116.008
2127	116.017
2126	116.016
2125	116.015
2124	116.014
2123	116.013
2122	116.012
2121	116.011
2120	116.001
2119	116
2118	115.999
2117	115.988
2116	115.987
2115	115.976
2114	115.975
2113	115.964
2112	115.963
2111	115.952
2110	115.951
2109	115.94
2108	115.939
2107	115.938
2106	115.937
2105	115.936
2104	115.935
2103	115.934
2102	115.943
2101	115.942
2100	115.941
2099	115.94
2098	115.939
2097	115.948
2096	115.947
2095	115.946
2094	115.935
2093	115.934
2092	115.933
2091	115.922
2090	115.921
2089	115.91
2088	115.9
2087	115.899
2086	115.888
2085	115.877
2084	115.876
2083	115.865
2082	115.863
2081	115.852
2080	115.85
2079	115.839
2078	115.837
2077	115.826
2076	115.824
2075	115.823
2074	115.812
2073	115.81
2072	115.809
2071	115.797
2070	115.796
2069	115.794
2068	115.783
2067	115.781
2066	115.77
2065	115.769
2064	115.757
2063	115.756
2062	115.754
2061	115.743
2060	115.741
2059	115.74
2058	115.738
2057	115.737
2056	115.735
2055	115.734
2054	115.733
2053	115.741
2052	115.74
2051	115.738
2050	115.737
2049	115.745
2048	115.744
2047	115.742
2046	115.741
2045	115.739
2044	115.738
2043	115.737
2042	115.735
2041	115.744
2040	115.742
2039	115.741
2038	115.739
2037	115.748
2036	115.746
2035	115.755
2034	115.753
2033	115.762
2032	115.761
2031	115.759
2030	115.768
2029	115.766
2028	115.765
2027	115.763
2026	115.762
2025	115.76
2024	115.749
2023	115.748
2022	115.746
2021	115.745
2020	115.743
2019	115.742
2018	115.75
2017	115.749
2016	115.757
2015	115.756
2014	115.764
2013	115.773
2012	115.792
2011	115.8
2010	115.809
2009	115.817
2008	115.826
2007	115.834
2006	115.843
2005	115.841
2004	115.85
2003	115.848
2002	115.847
2001	115.846
[truncated: 1,601 more rows]

## Sheet: PXRD of the recovered catalyst
10	7.71942
10.02	0.33335
10.04	-3.33843
10.06	-2.46735
10.08	0.11801
10.1	6.70337
10.12	8.88873
10.14	10.4169
10.16	8.40231
10.18	3.07339
10.2	-1.05553
10.22	-0.29874
10.24	1.45805
10.26	2.92912
10.28	9.34306
10.3	7.41413
10.32	3.71378
10.34	-0.78657
10.36	5.39879
10.38	7.61272
10.4	12.1695
10.42	7.09773
10.44	1.85452
10.46	0.46846
10.48	5.85382
10.5	11.4678
10.52	10.3103
10.54	7.18133
10.56	4.36669
10.58	4.29491
10.6	9.70885
10.62	11.2371
10.64	7.79386
10.66	3.00779
10.68	2.07887
10.7	2.34994
10.72	6.9353
10.74	10.6921
10.76	6.27746
10.78	4.26282
10.8	9.96247
10.82	8.26211
10.84	6.24748
10.86	6.23284
10.88	10.9039
10.9	10.0607
10.92	5.87464
10.94	3.66
10.96	2.47393
10.98	6.63072
11	3.98751
11.02	3.68716
11.04	1.5011
11.06	3.1436
11.08	3.41468
11.1	2.45718
11.12	0.01397
11.14	-0.42924
11.16	2.9847
11.18	7.2272
11.2	8.49828
11.22	6.76935
11.24	2.01186
11.26	3.22579
11.28	2.4683
11.3	3.08223
11.32	0.69616
11.34	6.53867
11.36	6.69546
11.38	6.39511
11.4	4.06618
11.42	5.16583
11.44	3.32262
11.46	6.33655
11.48	6.77906
11.5	4.99299
11.52	4.97835
11.54	11.7351
11.56	9.40622
11.58	3.16301
11.6	1.5198
11.62	4.44802
11.64	2.1191
11.66	2.53303
11.68	3.31839
11.7	5.73233
11.72	7.51769
11.74	5.58876
11.76	3.0027
11.78	2.58806
11.8	3.00199
11.82	3.4445
11.84	5.94415
11.86	7.58665
11.88	2.02916
11.9	2.24309
11.92	2.79988
11.94	8.27096
11.96	5.14203
11.98	5.58454
12	1.94133
12.02	3.78383
12.04	-3.43081
12.06	0.32598
12.08	6.22563
12.1	6.89671
12.12	2.36778
12.14	2.21029
12.16	8.76708
12.18	7.43816
12.2	3.96637
12.22	1.89459
12.24	6.45138
12.26	7.63675
12.28	3.36497
12.3	3.26461
12.32	7.59283
12.34	7.80677
12.36	6.90641
12.38	3.60606
12.4	0.27714
12.42	-0.3375
12.44	6.19072
12.46	7.49037
12.48	0.93287
12.5	-1.53891
12.52	5.18931
12.54	5.46039
12.56	2.96003
12.58	0.45968
12.6	4.01647
12.62	0.34469
12.64	-2.49852
12.66	-1.08459
12.68	5.44363
12.7	5.429
12.72	3.35721
12.74	2.54258
12.76	3.09937
12.78	3.34187
12.8	6.64152
12.82	4.36974
12.84	2.66939
12.86	1.74046
12.88	0.66868
12.9	-2.88881
12.92	2.06798
12.94	7.71048
12.96	9.32441
12.98	9.16692
13	11.0666
13.02	12.3376
13.04	8.89443
13.06	5.02265
13.08	4.00802
13.1	4.62195
13.12	2.35017
13.14	4.02124
13.16	7.12089
13.18	9.44911
13.2	4.4059
13.22	0.50555
13.24	-1.45195
13.26	1.87627
13.28	1.26163
13.3	1.50414
13.32	2.03236
13.34	1.67486
13.36	-0.08263
13.38	0.27416
13.4	1.28809
13.42	3.87345
13.44	9.68739
13.46	7.95846
13.48	3.28668
13.5	-3.5851
13.52	-1.85688
13.54	2.64277
13.56	9.31384
13.58	5.69921
13.6	0.71314
13.62	-0.15864
13.64	0.31244
13.66	5.15494
13.68	5.88316
13.7	1.58281
13.72	-6.28897
13.74	-1.67504
13.76	1.25318
13.78	1.92425
13.8	0.19533
13.82	0.98069
13.84	3.76605
13.86	4.83713
13.88	7.39392
13.9	6.12214
13.92	10.5361
13.94	10.7786
13.96	10.2497
13.98	4.17787
14	2.62038
14.02	4.06288
14.04	9.1911
14.06	7.51932
14.08	3.81897
14.1	1.40433
14.12	0.96112
14.14	-3.22494
14.16	-0.95387
14.18	1.66007
14.2	0.95971
14.22	-2.94064
14.24	0.30187
14.26	0.23008
14.28	2.41545
14.3	2.17224
14.32	10.6147
14.34	12.0572
14.36	11.7283
14.38	2.45654
14.4	3.52762
14.42	2.31298
14.44	0.58406
14.46	-4.57344
14.48	-4.27379
14.5	-0.65986
14.52	5.29693
14.54	7.39658
14.56	3.46766
14.58	-2.26127
14.6	-0.96162
14.62	3.7666
14.64	6.69482
14.66	6.99447
14.68	4.6084
14.7	1.62233
14.72	3.12198
14.74	5.93591
14.76	7.8927
14.78	6.79235
14.8	8.97771
14.82	3.04879
14.84	0.77701
14.86	8.90523
14.88	15.862
14.9	12.3331
14.92	0.23274
14.94	-5.86761
14.96	-4.56796
14.98	6.84597
15	12.8028
15.02	11.8453
15.04	5.91634
15.06	3.75885
15.08	-2.57008
15.1	-7.21328
15.12	-9.57078
15.14	-0.0997
15.16	3.3428
15.18	2.61388
15.2	0.82781
15.22	7.49889
15.24	9.36996
15.26	6.01247
15.28	3.99783
15.3	0.38319
15.32	3.51141
15.34	8.4682
15.36	18.8536
15.38	11.5818
15.4	6.28143
15.42	4.69536
15.44	8.62358
15.46	6.63752
15.48	6.16574
15.5	6.40824
15.52	6.42217
15.54	2.89325
15.56	2.56433
15.58	4.52112
15.6	10.3065
15.62	11.2061
15.64	9.22006
15.66	5.57685
15.68	5.96221
15.7	5.03329
15.72	0.27579
15.74	2.60401
15.76	3.33223
15.78	3.83188
15.8	0.90295
15.82	6.25975
15.84	4.24511
15.86	3.05904
15.88	-0.92703
15.9	-1.25595
15.92	2.6437
15.94	4.62906
15.96	6.90014
15.98	6.34264
16	10.9852
16.02	12.3991
16.04	12.413
16.06	7.28409
16.08	5.01231
16.1	2.48338
16.12	-0.55983
16.14	-0.63161
16.16	0.52518
16.18	0.48197
16.2	3.49633
16.22	6.65272
16.24	2.46042
16.26	-1.59558
16.28	-3.88316
16.3	-0.59845
16.32	5.71482
16.34	3.97095
16.36	2.22709
16.38	0.82608
16.4	4.76793
16.42	1.56692
16.44	-0.57695
16.46	-1.40653
16.48	-3.32183
16.5	2.07716
16.52	4.64758
16.54	7.96086
16.56	9.64556
16.58	6.41598
16.6	3.04354
16.62	-0.72889
16.64	0.2701
16.66	2.01194
16.68	8.63951
16.7	10.6671
16.72	2.15177
16.74	0.15076
16.76	3.83547
16.78	3.12017
16.8	0.40488
16.82	2.26101
16.84	3.28857
16.86	4.05899
16.88	6.48655
16.9	4.37126
16.92	3.42739
16.94	3.22638
16.96	2.82537
16.98	2.96722
17	6.88049
17.02	10.4223
17.04	10.2499
17.06	11.4775
17.08	3.01931
17.1	-3.63884
17.12	-5.55413
17.14	5.35914
17.16	10.101
17.18	11.0428
17.2	3.04183
17.22	4.26939
17.24	4.98266
17.26	12.0674
17.28	7.75207
17.3	6.46535
17.32	3.57863
17.34	4.6919
17.36	1.86232
17.38	4.9756
17.4	10.6317
17.42	9.88786
17.44	1.88685
17.46	0.2287
17.48	0.28483
17.5	0.05525
17.52	-0.48861
17.54	2.99609
17.56	6.16651
17.58	5.1655
17.6	7.45021
17.62	1.02062
17.64	-1.43753
17.66	-0.00997
17.68	5.87474
17.7	10.0452
17.72	8.92986
17.74	4.186
17.76	1.0707
17.78	5.12683
17.8	4.55439
17.82	3.2391
17.84	6.03809
17.86	7.92279
17.88	9.17893
17.9	11.5494
17.92	10.6912
17.94	8.03304
17.96	7.08917
17.98	9.23102
18	11.43
18.02	11.4862
18.04	8.51371
18.06	4.56984
18.08	6.54026
18.1	9.85354
18.12	10.1382
18.14	5.99437
18.16	1.22194
18.18	5.50664
18.2	9.81992
18.22	17.7903
18.24	13.6179
18.26	9.64546
18.28	9.44445
18.3	14.0149
18.32	9.75672
18.34	5.04142
18.36	2.78327
18.38	4.69654
18.4	5.12411
18.42	13.1517
18.44	12.6935
18.46	6.60679
18.48	2.92007
18.5	9.31906
18.52	7.40376
18.54	5.48847
18.56	1.28746
18.58	8.17216
18.6	9.74258
18.62	8.57014
18.64	-4.03087
18.66	0.1967
18.68	5.10997
18.7	2.82325
18.72	-1.54919
18.74	-2.43591
18.76	2.1345
18.78	-2.18079
18.8	2.87534
18.82	2.07433
18.84	6.87332
18.86	8.01517
18.88	12.2999
18.9	12.156
18.92	6.09786
18.94	3.35399
18.96	3.15298
18.98	4.03768
19	2.8081
19.02	5.29281
19.04	7.40608
19.06	1.74793
19.08	-0.11022
19.1	8.40305
19.12	13.8592
19.14	11.0296
19.16	4.85717
19.18	4.45616
19.2	2.39801
19.22	5.02557
19.24	7.82456
19.26	12.8235
19.28	10.7368
19.3	4.4501
19.32	4.82052
19.34	5.27665
19.36	3.96136
19.38	1.50321
19.4	12.1308
19.42	14.3012
19.44	10.3573
19.46	4.15631
19.48	7.7553
19.5	10.04
19.52	3.66757
19.54	-0.50487
19.56	-0.76302
19.58	3.8074
19.6	8.37781
19.62	9.03395
19.64	7.17579
19.66	1.17479
19.68	5.08806
19.7	2.91562
19.72	4.6289
19.74	1.14218
19.76	2.25545
19.78	-0.77413
19.8	1.59629
19.82	0.39528
19.84	-0.74859
19.86	4.79326
19.88	4.44939
19.9	5.70553
19.92	0.56166
19.94	3.73208
19.96	1.04536
19.98	6.61577
20	9.21476
20.02	6.72804
20.04	-0.38725
20.06	-3.93112
20.08	2.81073
20.1	6.03829
20.12	1.18014
20.14	-2.50659
20.16	0.40669
20.18	2.89139
20.2	7.51895
20.22	4.57509
20.24	6.71693
20.26	-4.62747
20.28	5.97236
20.3	8.03546
20.32	11.7336
20.34	-3.45137
20.36	-0.35143
20.38	3.29137
20.4	5.1056
20.42	1.23412
20.44	3.27692
20.46	2.29115
20.48	1.76252
20.5	-1.93754
20.52	2.90526
20.54	1.09092
20.56	4.99086
20.58	9.11938
20.6	10.3622
20.62	3.00498
20.64	-5.78079
20.66	-0.48085
20.68	4.0191
20.7	9.89047
20.72	4.3047
20.74	6.91893
20.76	6.5903
20.78	5.14738
20.8	3.04733
20.82	5.34727
20.84	12.5044
20.86	13.6614
20.88	8.58996
20.9	0.54704
20.92	1.67556
20.94	4.11836
20.96	4.67545
20.98	3.77539
21	6.84676
21.02	2.43242
21.04	3.33236
21.06	4.20373
21.08	9.24653
21.1	5.57505
21.12	5.47499
21.14	5.00351
21.16	9.47488
21.18	7.68911
21.2	0.87477
21.22	3.26042
21.24	6.9318
21.26	4.74602
21.28	8.53168
21.3	15.9745
21.32	12.9601
21.34	3.68866
21.36	4.01717
21.38	0.0314
21.4	1.81706
21.42	5.17414
21.44	2.61694
21.46	-1.82597
21.48	1.8454
21.5	5.57392
21.52	3.61672
21.54	7.60237
21.56	10.6166
21.58	5.80226
21.6	2.61649
21.62	3.63072
21.64	6.58781
21.66	4.23061
21.68	3.93055
21.7	1.91621
21.72	4.90187
21.74	5.34467
21.76	3.3589
21.78	0.31598
21.8	-1.18408
21.82	6.2873
21.84	7.3301
21.86	5.80147
21.88	-4.84144
21.9	-1.68436
21.92	-3.07013
21.94	-0.08447
21.96	3.50119
21.98	6.37256
22	5.21536
22.02	2.94387
22.04	8.21525
22.06	8.77233
22.08	6.01513
22.1	0.51508
22.12	7.67216
22.14	9.62925
22.16	8.27205
22.18	2.88628
22.2	6.24336
22.22	0.97188
22.24	3.55647
22.26	8.00239
22.28	12.1689
22.3	3.79727
22.32	4.22484
22.34	7.10948
22.36	12.337
22.38	1.67875
22.4	-0.46518
22.42	4.41946
22.44	11.4755
22.46	8.87445
22.48	9.95909
22.5	7.64373
22.52	3.18551
22.54	3.813
22.56	12.0976
22.58	17.2394
22.6	12.8955
22.62	8.52299
22.64	6.86477
22.66	7.74941
22.68	1.86262
22.7	4.54726
22.72	8.77475
22.74	11.3165
22.76	2.02974
22.78	0.45724
22.8	1.57045
22.82	3.48366
22.84	2.9683
22.86	5.16722
22.88	4.76615
22.9	-4.00636
22.92	-3.03601
22.94	2.70578
22.96	8.59041
22.98	3.47505
23	6.78826
23.02	8.21576
23.04	9.52897
23.06	5.07075
23.08	3.26968
23.1	6.64003
23.12	12.6389
23.14	13.295
23.16	11.3225
23.18	6.77858
23.2	6.60608
23.22	7.09072
23.24	8.31821
23.26	7.48857
23.28	10.0589
23.3	11.8007
23.32	7.14248
23.34	0.88426
23.36	3.82604
23.38	5.31068
23.4	3.28104
23.42	-3.23433
23.44	3.62174
23.46	7.56352
23.48	6.87673
23.5	3.3328
23.52	3.13172
23.54	-0.09792
23.56	4.18672
23.58	19.0999
23.6	23.5274
23.62	14.0121
23.64	6.26813
23.66	11.667
23.68	13.5231
23.7	8.32204
23.72	5.57811
23.74	8.37703
23.76	7.97596
23.78	7.31774
23.8	8.31667
23.82	10.9727
23.84	8.11451
23.86	4.71344
23.88	4.82665
23.9	6.91129
23.92	7.53878
23.94	9.25199
23.96	15.3652
23.98	14.3356
24	10.4202
24.02	15.6477
24.04	20.1038
24.06	13.5598
24.08	6.70161
24.1	15.5862
24.12	19.2137
24.14	10.127
24.16	8.4973
24.18	13.0962
24.2	9.49515
24.22	2.40836
24.24	7.32157
24.26	11.9491
24.28	9.63371
24.3	7.48977
24.32	4.94584
24.34	1.17334
24.36	-0.48488
24.38	5.77118
24.4	7.74154
24.42	7.85475
24.44	5.51081
24.46	5.90974
24.48	4.42295
24.5	2.22187
24.52	5.47794
24.54	9.16258
24.56	14.7044
24.58	13.3319
24.6	4.47364
24.62	6.78685
24.64	13.1572
24.66	12.4418
24.68	1.18362
24.7	2.55397
24.72	8.5529
24.74	5.12325
24.76	-1.1064
24.78	-3.53604
24.8	0.09145
24.82	4.74752
24.84	4.4893
24.86	6.3168
24.88	3.28715
24.9	2.40036
24.92	-2.115
24.94	1.88392
24.96	4.85428
24.98	13.6532
25	12.0521
25.02	5.19391
25.04	1.90712
25.06	10.4489
25.08	14.1907
25.1	12.7896
25.12	4.0171
25.14	0.38745
25.16	2.5578
25.18	9.81387
25.2	6.32708
25.22	5.26886
25.24	2.21065
25.26	6.66671
25.28	8.23707
25.3	6.80742
25.32	-4.27937
25.34	-1.8233
25.36	3.17562
25.38	7.28883
25.4	0.88775
25.42	5.17239
25.44	3.05703
25.46	-0.00119
25.48	-5.28798
25.5	-0.66048
25.52	2.10845
25.54	4.08274
25.56	3.29498
25.58	6.8862
25.6	4.90589
25.62	1.03954
25.64	0.20176
25.66	1.87826
25.68	3.18334
25.7	2.0027
25.72	1.93635
25.74	-0.18715
25.76	2.3465
25.78	8.39443
25.8	5.32808
25.82	8.94744
25.84	8.56681
25.86	9.27188
25.88	1.17696
25.9	-2.51796
25.92	-3.01289
25.94	-2.8221
25.96	-0.65988
25.98	-1.84052
26	7.80742
26.02	11.8268
26.04	12.1033
26.06	1.97979
26.08	-2.20085
26.1	-7.12434
26.12	-1.73355
26.14	5.48581
26.16	6.59089
26.18	-0.93261
26.2	3.05818
26.22	10.5633
26.24	7.81119
26.26	2.31627
26.28	1.04992
26.3	7.32642
26.32	9.6315
26.34	13.5937
26.36	11.2416
26.38	10.6324
26.4	9.13752
26.42	6.55688
26.44	2.37624
26.46	1.85275
26.48	7.75782
26.5	9.74861
26.52	10.6537
26.54	8.98734
26.56	5.89242
26.58	1.88321
26.6	5.41685
26.62	6.66479
26.64	3.05558
26.66	-1.63935
26.68	2.18002
26.7	7.51366
26.72	8.84731
26.74	4.35239
26.76	3.68604
26.78	3.21969
26.8	7.89619
26.82	5.91555
26.84	3.50634
26.86	1.29713
26.88	4.43078
26.9	7.10729
26.92	6.52665
26.94	3.74601
26.96	-0.49177
26.98	3.95616
27	9.71838
27.02	9.2806
27.04	10.1857
27.06	10.6908
27.08	9.0244
27.1	1.50091
27.12	-1.76544
27.14	1.5682
27.16	8.27328
27.18	7.06407
27.2	6.912
27.22	5.58851
27.24	8.55073
27.26	4.37009
27.28	6.73231
27.3	9.15167
27.32	13.1996
27.34	7.24754
27.36	2.6669
27.38	1.60055
27.4	4.67705
27.42	4.55356
27.44	3.68721
27.46	0.10657
27.48	-4.58835
27.5	-0.56899
27.52	-2.72106
27.54	-2.98741
27.56	-1.82519
27.58	7.22274
27.6	9.72782
27.62	7.8329
27.64	7.19511
27.66	10.7859
27.68	9.11955
27.7	4.36749
27.72	0.41542
27.74	-3.76522
27.76	-6.66014
27.78	2.67351
27.8	14.0357
27.82	13.5694
27.84	1.90302
27.86	-3.16333
27.88	-0.17254
27.9	7.10397
27.92	10.9233
27.94	8.2284
27.96	4.73348
27.98	-1.36144
28	6.08649
28.02	6.763
28.04	3.86807
28.06	-1.74114
28.08	9.67822
28.1	9.66902
28.12	7.80266
28.14	5.2506
28.16	5.35567
28.18	0.37504
28.2	1.05154
28.22	0.38519
28.24	-0.62402
28.26	1.05248
28.28	3.87185
28.3	2.54835
28.32	10.3106
28.34	10.8728
28.36	1.94929
28.38	-1.11706
28.4	9.53088
28.42	10.7502
28.44	3.71246
28.46	3.58896
28.48	6.80832
28.5	5.62769
28.52	3.04705
28.54	3.86641
28.56	8.08577
28.58	8.24799
28.6	11.6959
28.62	14.7153
28.64	12.1632
28.66	-1.7317
28.68	-2.82663
28.7	2.16417
28.72	7.49781
28.74	8.23146
28.76	8.87939
28.78	4.78447
28.8	5.80479
28.82	6.85029
28.84	11.6315
28.86	10.5207
28.88	9.0092
28.9	8.49808
28.92	13.3012
28.94	15.1616
28.96	4.87902
28.98	5.88219
29	8.39965
29.02	7.85996
29.04	-0.9083
29.06	4.23773
29.08	10.6695
29.1	9.72978
29.12	6.50438
29.14	5.82183
29.16	8.08214
29.18	8.42817
29.2	5.11705
29.22	7.06308
29.24	15.0091
29.26	10.9266
29.28	4.70116
29.3	3.50433
29.32	7.56464
29.34	-1.66076
29.36	-3.20045
29.38	-2.91156
29.4	0.52018
29.42	-3.50523
29.44	4.75509
29.46	6.58683
29.48	9.36143
29.5	3.27888
29.52	3.08205
29.54	-1.60049
29.56	2.60267
29.58	4.43442
29.6	4.49473
29.62	-2.7021
29.64	-4.41322
29.66	-3.09576
29.68	2.10741
29.7	7.85343
29.72	13.9137
29.74	13.5455
29.76	8.23437
29.78	6.83754
29.8	5.92642
29.82	8.44388
29.84	15.6756
29.86	17.5359
29.88	17.0248
29.9	18.1994
29.92	24.1169
29.94	22.6629
29.96	15.6089
29.98	16.0121
30	15.101
30.02	19.6184
30.04	14.0502
30.06	18.7962
30.08	19.8851
30.1	22.2883
30.12	22.8914
30.14	25.5232
30.16	34.7549
30.18	32.9866
30.2	25.8469
30.22	20.2787
30.24	18.3961
30.26	22.685
30.28	25.6025
30.3	28.0342
30.32	27.8374
30.34	30.212
30.36	29.5866
30.38	29.4755
30.4	30.0215
30.42	34.0247
30.44	30.3421
30.46	26.6596
30.48	18.0342
30.5	21.7802
30.52	29.1262
30.54	26.6151
30.56	19.1326
30.58	19.9929
30.6	24.7961
30.62	22.6564
30.64	20.9453
30.66	18.6913
30.68	26.0659
30.7	20.7262
30.72	17.7294
30.74	13.5325
30.76	24.0214
30.78	24.4532
30.8	23.0278
30.82	17.0595
30.84	10.8341
30.86	15.123
30.88	17.3261
30.9	13.3579
30.92	9.53248
30.94	16.3642
30.96	19.5388
30.98	17.142
31	9.6023
31.02	6.49118
31.04	6.98007
31.06	9.26895
31.08	7.47212
31.1	4.961
31.12	7.9356
31.14	11.4531
31.16	12.1419
31.18	6.91654
31.2	-0.08029
31.22	3.49431
31.24	4.44033
31.26	10.1292
31.28	10.6181
31.3	16.3927
31.32	10.3387
31.34	1.42761
31.36	-3.91208
31.38	-0.30891
31.4	8.77997
31.42	13.4403
31.44	10.6149
31.46	2.96091
31.48	0.79265
31.5	2.13868
31.52	1.14185
31.54	-0.96927
31.56	2.0339
31.58	5.37993
31.6	6.61167
31.62	4.50055
31.64	3.90372
31.66	4.96403
31.68	8.1672
31.7	4.88466
31.72	-1.31217
31.74	-2.02329
31.76	3.80845
31.78	7.24019
31.8	3.01479
31.82	0.0751
31.84	-0.46459
31.86	5.48144
31.88	4.85604
31.9	2.17349
31.92	-5.96619
31.94	-9.36302
31.96	-4.417
31.98	3.12903
32	2.16077
32.02	-3.72178
32.04	5.96711
32.06	8.62742
32.08	6.00202
32.1	-1.28053
32.12	2.35121
32.14	0.58179
32.16	-0.92668
32.18	-2.76804
32.2	0.51435
32.22	1.08467
32.24	-2.43156
32.26	-4.66208
32.28	-0.74974
32.3	3.21974
32.32	7.9035
32.34	5.78727
32.36	5.04246
32.38	6.89766
32.4	4.26714
32.42	1.5509
32.44	-3.22247
32.46	0.51843
32.48	-1.16923
32.5	0.65739
32.52	0.42687
32.54	-0.91793
32.56	5.62298
32.58	3.27817
32.6	1.73337
32.62	-3.41144
32.64	7.18661
32.66	8.52752
32.68	2.03986
32.7	1.09505
32.72	2.57882
32.74	4.51973
32.76	3.11778
32.78	7.57297
32.8	4.54245
32.82	4.45479
32.84	2.16713
32.86	4.05089
32.88	7.9918
32.9	5.81842
32.92	0.21648
32.94	-5.84261
32.96	-0.70171
32.98	0.95349
33	4.80868
33.02	3.29245
33.04	3.66193
33.06	-2.16859
33.08	-0.82768
33.1	-0.77249
33.12	3.71128
33.14	3.10933
33.16	2.76452
33.18	0.81972
33.2	-1.98223
33.22	0.73011
33.24	1.07101
33.26	0.49764
33.28	-2.07574
33.3	-3.13483
33.32	1.32036
33.34	1.34699
33.36	6.54504
33.38	2.77166
33.4	-1.34457
33.42	-0.80366
33.44	8.19439
33.46	11.221
33.48	5.39049
33.5	1.47426
33.52	2.27231
33.54	8.95607
33.56	5.32555
33.58	4.46646
33.6	4.55023
33.62	5.43399
33.64	2.48919
33.66	1.91581
33.68	0.82815
33.7	-1.63094
33.72	3.65282
33.74	4.85087
33.76	0.56321
33.78	-3.01017
33.8	0.75931
33.82	3.55737
33.84	-0.21601
33.86	-1.16082
33.88	6.32295
33.9	10.2067
33.92	7.09048
33.94	3.28853
33.96	9.22944
33.98	10.1703
34	8.9684
34.02	0.59502
34.04	2.73593
34.06	1.04827
34.08	4.30346
34.1	7.93009
34.12	9.89957
34.14	4.4119
34.16	1.43853
34.18	2.29372
34.2	3.12035
34.22	1.43268
34.24	3.45931
34.26	5.62879
34.28	9.14112
34.3	2.76775
34.32	3.3658
34.34	5.36385
34.36	6.33333
34.38	0.24567
34.4	-0.27057
34.42	-1.90109
34.44	7.12553
34.46	8.06644
34.48	3.60735
34.5	1.54826
34.52	8.54665
34.54	11.4592
34.56	8.07919
34.58	4.51939
34.6	1.26927
34.62	-0.26534
34.64	5.62863
34.66	9.40832
34.68	6.95943
34.7	-3.46089
34.72	-1.45263
34.74	5.72705
34.76	2.36388
34.78	5.28642
34.8	7.58039
34.82	12.7315
34.84	8.53976
34.86	10.8337
34.88	12.8134
34.9	14.3931
34.92	15.3156
34.94	9.52389
34.96	9.53214
34.98	8.96897
35	8.2058
35.02	9.58548
35.04	14.3366
35.06	21.8591
35.08	21.6674
35.1	20.5899
35.12	19.341
35.14	15.5493
35.16	21.1576
35.18	25.2515
35.2	27.6598
35.22	22.5252
35.24	15.4477
35.26	20.2274
35.28	29.8357
35.3	34.3296
35.32	34.3093
35.34	36.1747
35.36	37.0401
35.38	34.4769
35.4	42.4852
35.42	47.0649
35.44	44.8731
35.46	41.5957
35.48	47.9753
35.5	60.2122
35.52	54.9347
35.54	46.2573
35.56	50.8941
35.58	58.3023
35.6	62.9963
35.62	72.4046
35.64	73.2128
35.66	75.1639
35.68	80.6579
35.7	80.4376
35.72	64.4458
35.74	69.7969
35.76	78.5195
35.78	73.8706
35.8	72.5931
35.82	77.8871
35.84	82.3239
35.86	70.1893
35.88	70.6833
35.9	74.863
35.92	76.557
35.94	77.5938
35.96	71.5735
35.98	63.4674
36	57.9043
36.02	60.7411
36.04	59.0351
36.06	53.729
36.08	48.0516
36.1	44.2313
36.12	48.4109
36.14	44.8192
36.16	39.9703
36.18	40.9786
36.2	42.244
36.22	35.3951
36.24	35.6319
36.26	39.4687
36.28	36.0198
36.3	31.5138
36.32	27.5506
36.34	22.9589
36.36	19.0529
36.38	18.2325
36.4	17.1265
36.42	22.0205
36.44	23.9716
36.46	27.837
36.48	21.6167
36.5	18.0821
36.52	10.5189
36.54	12.2129
36.56	12.4211
36.58	11.8865
36.6	8.89478
36.62	13.4459
36.64	16.4256
36.66	11.7767
36.68	7.69923
36.7	3.67892
36.72	2.14431
36.74	-0.33314
36.76	6.87511
36.78	8.42622
36.8	10.9488
36.82	9.49988
36.84	9.79385
36.86	3.94496
36.88	-3.01822
36.9	-4.8671
36.92	6.22687
36.94	10.4923
36.96	8.18623
36.98	4.39449
37	5.63132
37.02	2.26814
37.04	-0.40932
37.06	-1.2582
37.08	0.60719
37.1	5.32814
37.12	4.91242
37.14	2.22071
37.16	3.73637
37.18	9.76545
37.2	10.1658
37.22	2.36609
37.24	-4.06216
37.26	-4.57613
37.28	-2.40437
37.3	0.11023
37.32	0.88198
37.34	2.25373
37.36	3.3112
37.38	3.65438
37.4	4.71184
37.42	0.59788
37.44	0.28391
37.46	-0.83005
37.48	-0.0583
37.5	-1.00084
37.52	1.39949
37.54	3.97124
37.56	1.05727
37.58	-2.91384
37.6	-7.77066
37.62	-2.62748
37.64	7.08713
37.66	5.80174
37.68	1.77349
37.7	-3.85476
37.72	2.6027
37.74	0.51731
37.76	12.2319
37.78	7.54652
37.8	2.06113
37.82	-10.2814
37.84	-6.85251
37.86	-5.08076
37.88	0.29099
37.9	4.74845
37.92	1.29163
37.94	-2.59376
37.96	-3.93629
37.98	0.54974
38	-0.04994
38.02	-3.42104
38.04	-6.44929
38.06	-0.64897
38.08	0.95135
38.1	-0.84833
38.12	1.63771
38.14	5.52374
38.16	-1.56165
38.18	-5.16133
38.2	-2.30386
38.22	-3.18926
38.24	-6.84608
38.26	-4.47433
38.28	-1.98829
38.3	0.69775
38.32	1.8695
38.34	0.84125
38.36	-1.92986
38.38	-4.12954
38.4	-2.98636
38.42	-0.5289
38.44	-0.1
38.46	2.58603
38.48	4.32921
38.5	8.04382
38.52	0.67271
38.54	1.64446
38.56	-3.49807
38.58	-2.38346
38.6	-5.86886
38.62	0.18861
38.64	2.24607
38.66	3.21782
38.68	-0.75328
38.7	-0.98153
38.72	-0.23836
38.74	-1.26661
38.76	-1.03771
38.78	2.8769
38.8	1.9915
38.82	-3.06532
38.84	-9.52214
38.86	-7.49325
38.88	-7.77864
38.9	-6.60689
38.92	-4.178
38.94	1.39375
38.96	1.65122
38.98	0.70868
39	-6.46242
39.02	-7.20496
39.04	-4.00464
39.06	1.4814
39.08	-1.31828
39.1	-6.68939
39.12	-6.11764
39.14	-7.2316
39.16	0.39729
39.18	0.16904
39.2	-2.88778
39.22	-4.9446
39.24	1.31287
39.26	5.88462
39.28	-0.45792
39.3	-6.17188
39.32	-6.97156
39.34	-4.74267
39.36	0.82908
39.38	3.88655
39.4	7.17258
39.42	1.63005
39.44	-0.91249
39.46	2.03069
39.48	3.00244
39.5	1.31705
39.52	2.14594
39.54	3.31769
39.56	-1.33913
39.58	-1.11024
39.6	0.20437
39.62	-1.56674
39.64	-7.30927
39.66	-2.70895
39.68	2.03423
39.7	6.77741
39.72	4.12059
39.74	0.32091
39.76	-1.62163
39.78	-3.79273
39.8	-5.24956
39.82	-5.53495
39.84	-0.53463
39.86	2.60855
39.88	1.60887
39.9	1.63777
39.92	-2.84763
39.94	-5.07588
39.96	-2.10412
39.98	2.78191
40	0.18223
40.02	-2.81745
40.04	-0.30284
40.06	-2.44537
40.08	-3.44505
40.1	-3.15902
40.12	0.86988
40.14	0.64163
40.16	1.38481
40.18	-1.47201
40.2	-1.67169
40.22	-2.21423
40.24	1.75752
40.26	1.72927
40.28	1.52959
40.3	-0.09866
40.32	0.64452
40.34	-0.18373
40.36	2.70231
40.38	6.18835
40.4	7.3601
40.42	2.58899
40.44	3.3036
40.46	3.70392
40.48	0.90424
40.5	-2.12401
40.52	0.13345
40.54	5.99092
40.56	1.47695
40.58	-1.03701
40.6	0.70617
40.62	3.70649
40.64	1.90681
40.66	2.99285
40.68	4.30746
40.7	0.19349
40.72	-3.92047
40.74	1.36556
40.76	2.73731
40.78	5.79478
40.8	3.36653
40.82	3.16685
40.84	0.85289
40.86	2.73892
40.88	6.0821
40.9	6.93957
40.92	2.11132
40.94	-4.00265
40.96	-0.74518
40.98	7.45514
41	8.14117
41.02	0.25578
41.04	-4.25818
41.06	-4.34357
41.08	-1.65754
41.1	-5.34293
41.12	-8.11404
41.14	-6.51372
41.16	-3.62768
41.18	1.57264
41.2	1.97296
41.22	0.71614
41.24	-2.54068
41.26	-2.02607
41.28	-1.28289
41.3	-3.79686
41.32	-5.25368
41.34	-4.82478
41.36	-1.85303
41.38	-1.19557
41.4	-1.82382
41.42	-0.73778
41.44	0.37682
41.46	1.60572
41.48	0.89175
41.5	0.17779
41.52	3.12097
41.54	3.49272
41.56	0.75018
41.58	-3.47807
41.6	-0.50632
41.62	5.494
41.64	9.26575
41.66	4.46608
41.68	-1.1336
41.7	0.23815
41.72	4.12418
41.74	0.66736
41.76	-2.13232
41.78	-1.01771
41.8	5.35404
41.82	6.46865
41.84	4.81183
41.86	5.55501
41.88	5.49819
41.9	0.15565
41.92	-2.75831
41.94	3.81344
41.96	7.15662
41.98	4.49979
42	0.04297
42.02	-1.7567
42.04	2.32933
42.06	7.9868
42.08	11.1585
42.1	4.98744
42.12	0.4449
42.14	-1.78335
42.16	3.35983
42.18	3.04587
42.2	-3.23952
42.22	-6.95286
42.24	2.41873
42.26	10.6084
42.28	8.35719
42.3	-1.10029
42.32	-4.07033
42.34	-3.89752
42.36	0.30387
42.38	0.87669
42.4	4.19236
42.42	7.67946
42.44	9.19514
42.46	7.76795
42.48	4.7122
42.5	1.88502
42.52	-0.57074
42.54	3.14494
42.56	5.5749
42.58	3.23343
42.6	1.63481
42.62	1.29335
42.64	0.49473
42.66	2.58184
42.68	7.78322
42.7	6.27033
42.72	5.10029
42.74	6.78739
42.76	8.21735
42.78	0.99016
42.8	2.4487
42.82	4.79294
42.84	10.4229
42.86	5.91
42.88	2.99711
42.9	6.31278
42.92	13.0284
42.94	12.2298
42.96	5.63123
42.98	5.57547
43	6.17686
43.02	6.49254
43.04	9.63678
43.06	10.981
43.08	13.411
43.1	8.5838
43.12	6.21376
43.14	2.07229
43.16	1.27368
43.18	9.10364
43.2	16.6765
43.22	17.7921
43.24	16.6221
43.26	19.4235
43.28	18.3677
43.3	11.2548
43.32	11.1991
43.34	17.0576
43.36	19.9733
43.38	9.86038
43.4	5.8332
43.42	9.69173
43.44	19.1217
43.46	18.2659
43.48	19.2387
43.5	18.383
43.52	15.9844
43.54	13.7858
43.56	11.0157
43.58	14.6171
43.6	13.9614
43.62	13.277
43.64	11.107
43.66	12.1941
43.68	13.6241
43.7	8.39688
43.72	6.54112
43.74	9.02822
43.76	12.801
43.78	7.74528
43.8	5.14667
43.82	10.7481
43.84	15.6923
43.86	12.4366
43.88	9.06651
43.9	9.21076
43.92	5.04072
43.94	2.6421
43.96	5.75778
43.98	10.3592
44	7.93198
44.02	5.53337
44.04	1.56333
44.06	-2.29242
44.08	0.25182
44.1	3.82464
44.12	3.74031
44.14	5.59884
44.16	7.54309
44.18	8.25876
44.2	1.63158
44.22	2.69011
44.24	2.66293
44.26	5.15003
44.28	7.52284
44.3	8.32423
44.32	2.66848
44.34	-1.47299
44.36	2.55697
44.38	4.27264
44.4	3.01689
44.42	5.53256
44.44	6.81966
44.46	7.13534
44.48	8.93673
44.5	5.70954
44.52	0.02522
44.54	-3.9734
44.56	0.22799
44.58	2.57224
44.6	6.43077
44.62	3.40359
44.64	5.03354
44.66	2.20636
44.68	2.06489
44.7	-0.53372
44.72	2.61053
44.74	0.5262
44.76	0.6133
44.78	0.95755
44.8	2.41608
44.82	1.3889
44.84	0.41885
44.86	2.10596
44.88	3.02163
44.9	-1.17698
44.92	-4.43274
44.94	-3.14563
44.96	-0.14543
44.98	-0.85477
45	0.72834
45.02	1.40192
45.04	-1.38283
45.06	-5.13902
45.08	-4.52377
45.1	-3.45138
45.12	-0.89328
45.14	3.15054
45.16	3.93721
45.18	2.15246
45.2	2.45342
45.22	1.15438
45.24	-2.65895
45.26	-4.50085
45.28	-0.62846
45.3	2.70107
45.32	0.54489
45.34	-3.38272
45.36	-1.39605
45.38	0.73348
45.4	-1.19413
45.42	-1.09317
45.44	4.6935
45.46	6.90875
45.48	5.324
45.5	2.65353
45.52	0.38306
45.54	-1.88741
45.56	-0.44359
45.58	2.91451
45.6	1.44404
45.62	1.25929
45.64	3.24596
45.66	2.08978
45.68	0.04788
45.7	1.03455
45.72	3.70694
45.74	2.29362
45.76	2.62315
45.78	-0.10446
45.8	0.11078
45.82	1.92603
45.84	4.99842
45.86	6.69938
45.88	5.37176
45.9	0.81558
45.92	-0.22632
45.94	1.56036
45.96	1.3756
45.98	-1.40915
46	-1.22248
46.02	-1.55009
46.04	-1.33484
46.06	-2.63388
46.08	-4.81864
46.1	-0.97482
46.12	2.29757
46.14	5.36996
46.16	0.41377
46.18	1.57188
46.2	-0.78431
46.22	0.7738
46.24	0.10333
46.26	3.49
46.28	2.19096
46.3	0.49192
46.32	-2.12141
46.34	-2.42045
46.36	-4.66234
46.38	-0.93281
46.4	4.11101
46.42	2.35482
46.44	0.71293
46.46	-0.12897
46.48	0.40056
46.5	-6.24134
46.52	-0.68324
46.54	3.76058
46.56	8.6044
46.58	1.73393
46.6	-1.96511
46.62	-7.26415
46.64	0.66538
46.66	2.56634
46.68	4.81016
46.7	3.48255
46.72	3.69779
46.74	5.17018
46.76	3.29971
46.78	3.74353
46.8	-2.52694
46.82	0.63116
46.84	1.67498
46.86	-0.8812
46.88	-6.09453
46.9	-2.99357
46.92	6.82168
46.94	4.37978
46.96	2.36645
46.98	0.86741
47	3.62551
47.02	1.52647
47.04	0.79886
47.06	0.29982
47.08	3.60078
47.1	3.27317
47.12	2.6027
47.14	1.70366
47.16	3.80462
47.18	1.73415
47.2	0.69226
47.22	-0.6925
47.24	-1.39154
47.26	2.39514
47.28	4.4961
47.3	3.22563
47.32	-2.64484
47.34	-5.0296
47.36	-2.15721
47.38	6.51518
47.4	6.959
47.42	1.9171
47.44	-1.49623
47.46	-0.73812
47.48	-1.86574
47.5	-1.10763
47.52	2.0219
47.54	2.09429
47.56	5.96668
47.58	8.63906
47.6	4.65431
47.62	-0.21616
47.64	-0.40091
47.66	1.67147
47.68	0.62958
47.7	0.55911
47.72	0.94578
47.74	5.13246
47.76	4.7477
47.78	5.56295
47.8	3.06391
47.82	2.67915
47.84	-0.76274
47.86	3.56679
47.88	2.18203
47.9	3.65442
47.92	-0.5589
47.94	0.62777
47.96	-1.78556
47.98	2.02969
48	0.33065
48.02	4.14589
48.04	5.07543
48.06	3.71924
48.08	1.47735
48.1	1.32116
48.12	0.42212
48.14	2.2088
48.16	2.30976
48.18	-0.21786
48.2	-4.00261
48.22	-0.98736
48.24	-1.42926
48.26	0.44313
48.28	-0.51306
48.3	0.44505
48.32	-0.31114
48.34	-1.15303
48.36	-1.16636
48.38	1.5346
48.4	4.77842
48.42	2.45081
48.44	0.58034
48.46	-2.23299
48.48	-1.58917
48.5	0.7975
48.52	3.86989
48.54	4.82799
48.56	3.24324
48.58	3.3442
48.6	-0.12627
48.62	4.71755
48.64	5.76136
48.66	6.91947
48.68	0.50614
48.7	3.6071
48.72	2.10806
48.74	2.52331
48.76	-0.14716
48.78	2.21094
48.8	2.48333
48.82	2.81286
48.84	-0.71475
48.86	-0.98522
48.88	-0.02712
48.9	-0.81187
48.92	0.23194
48.94	-0.29567
48.96	1.54815
48.98	0.82054
49	2.03578
49.02	1.2796
49.04	3.69485
49.06	7.19581
49.08	2.98248
49.1	1.45487
49.12	5.89869
49.14	8.3425
49.16	7.07203
49.18	1.34442
49.2	-0.35462
49.22	0.97491
49.24	1.27587
49.26	1.0054
49.28	-3.92221
49.3	3.40732
49.32	2.36543
49.34	1.09496
49.36	-4.43265
49.38	-0.44598
49.4	1.71212
49.42	4.8988
49.44	3.02833
49.46	3.95786
49.48	1.65882
49.5	3.01692
49.52	2.6036
49.54	1.59027
49.56	4.72036
49.58	6.50728
49.6	5.3405
49.62	-0.41081
49.64	0.05933
49.66	1.47425
49.68	4.40345
49.7	5.64694
49.72	4.20472
49.74	3.44821
49.76	5.80599
49.78	2.8209
49.8	0.92154
49.82	4.05074
49.84	9.09423
49.86	5.48058
49.88	4.06693
49.9	7.71042
49.92	5.09676
49.94	-1.83118
49.96	-1.98769
49.98	0.88438
[truncated: 1,501 more rows]
